# Supplementary material
Source: PubMed Central journal article supplement (PMC3905243)

Supplementary Figure 1: Heatmap of the 68 non-small cell lung cancer cell lines with EGFR wild-type used to train the Sorafenib Sensitivity Signature

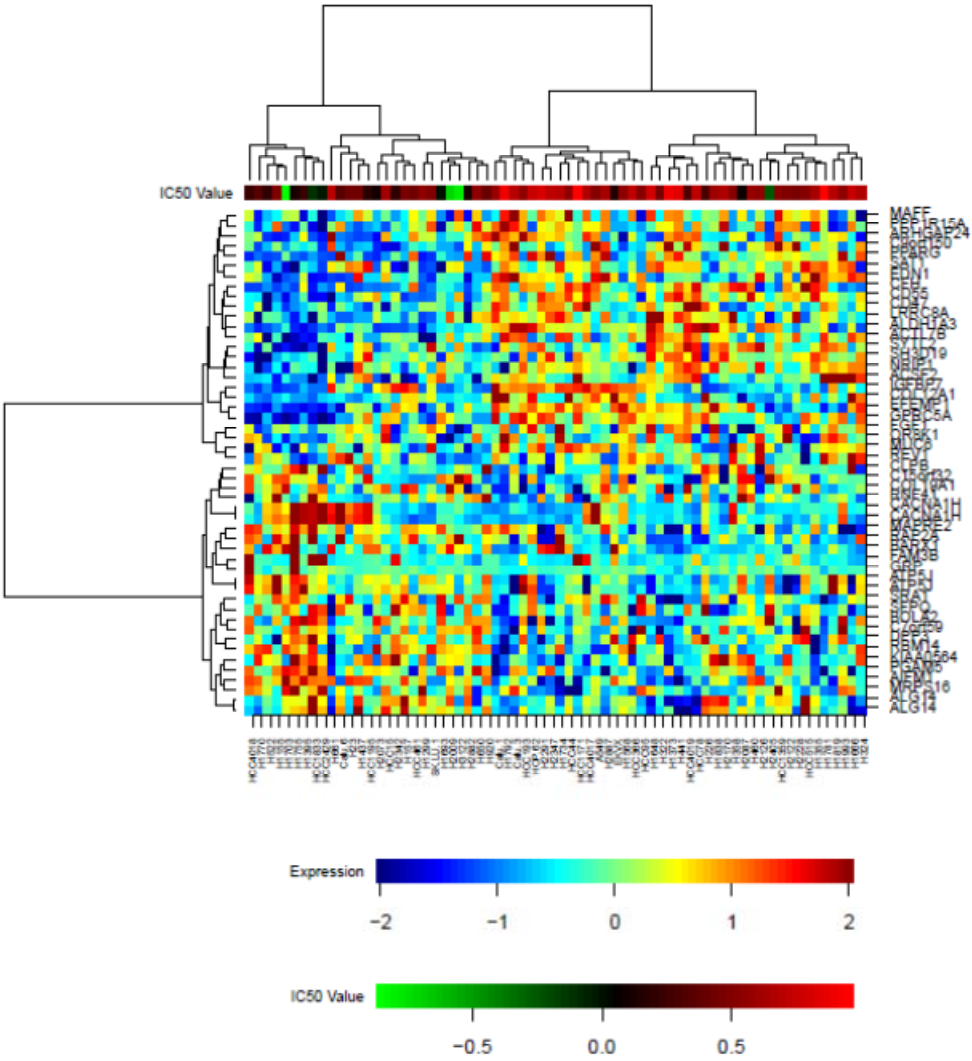

Supplementary Figure 2: Heatmap of the 37 patients with *EGFR* mutant tumors using the Sorafenib Sensitivity signature; yes: disease control at 8 weeks; no: no disease control at 8 weeks

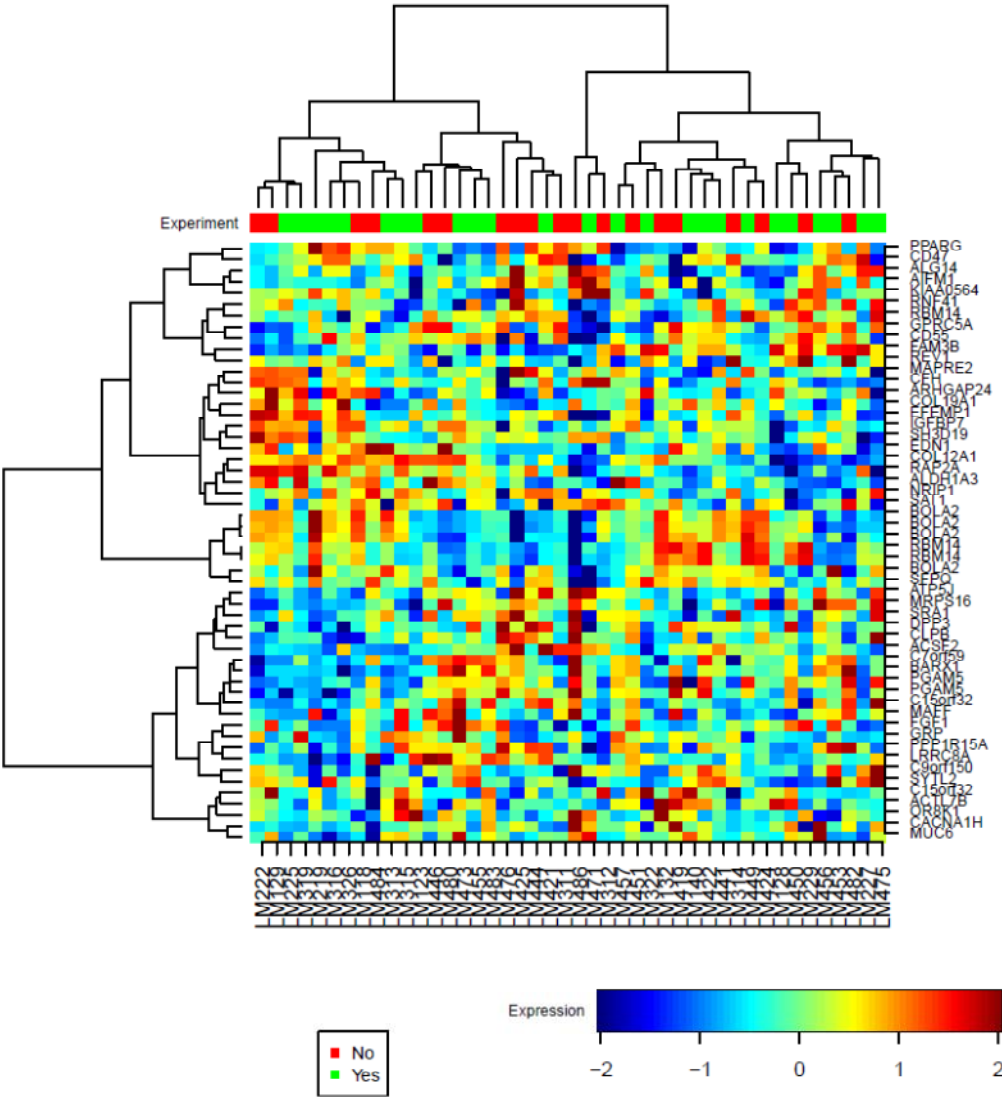

Supplement: NIHMS534085-supplement-1.pdf [file NIHMS534085-supplement-1.pdf]
