# Supplementary material
Source: PubMed Central journal article supplement (PMC3905243)
Supplement: NIHMS534085-supplement-2.pdf [file NIHMS534085-supplement-2.pdf]

**Supplementary Table 1:** Non-small cell lung cancer cell lines used to develop the sorafenib sensitivity signature

| Sort | Cell Line | KRAS                     | EGFR | Sorafenib (uM) |
|------|-----------|--------------------------|------|----------------|
| 1    | H1703     | WT                       | WT   | -0.85          |
| 2    | H2009     | [c.35G>C; p.G12A]        | WT   | -0.71          |
| 3    | H2405     | WT                       | WT   | -0.24          |
| 4    | HCC1833   | WT                       | WT   | -0.12          |
| 5    | HCC2429   | WT                       | WT   | -0.02          |
| 6    | H1693     | WT                       | WT   | 0.02           |
| 7    | H2087     | WT                       | WT   | 0.08           |
| 8    | H2073     | WT                       | WT   | 0.10           |
| 9    | H1755     | WT                       | WT   | 0.11           |
| 10   | H2882     | WT                       | WT   | 0.13           |
| 11   | EKVX      | WT                       | WT   | 0.14           |
| 12   | HCC1195   | WT                       | WT   | 0.19           |
| 13   | H2342     | WT                       | WT   | 0.20           |
| 14   | H522      | WT                       | WT   | 0.21           |
| 15   | HCC4018   | WT                       | WT   | 0.24           |
| 16   | H1395     | WT                       | WT   | 0.24           |
| 17   | H226      | WT                       | WT   | 0.30           |
| 18   | HCC4019   | [c.35G>T; p.G12V]        | WT   | 0.33           |
| 19   | Calu-6    | [c.180_181TC>CA; p.Q61K] | WT   | 0.33           |
| 20   | H1770     | WT                       | WT   | 0.35           |
| 21   | H920      | WT                       | WT   | 0.42           |
| 22   | H1437     | WT                       | WT   | 0.43           |
| 23   | HCC461    | 12GAT (Gazdar)           | WT   | 0.44           |
| 24   | H23       | [c.34G>T; p.G12C]        | WT   | 0.44           |
| 25   | H157      | [c.34G>C; p.G12R]        | WT   | 0.45           |
| 26   | H2228     | WT                       | WT   | 0.45           |
| 27   | H322      | WT                       | WT   | 0.46           |
| 28   | H1155     | [c.183A>T; p.Q61H]       | WT   | 0.48           |
| 29   | SK-LU-1   | [c.35G>A; p.G12D]        | WT   | 0.48           |
| 30   | H2122     | [c.34G>T; p.G12C]        | WT   | 0.49           |
| 31   | A549      | [c.34G>A; p.G12S]        | WT   | 0.52           |
| 32   | HCC1359   | WT                       | WT   | 0.52           |
| 33   | H358      | [c.35G>T; p.G12V]        | WT   | 0.52           |
| 34   | HCC95     | WT                       | WT   | 0.52           |
| 35   | HCC515    | [c.38G>A; p.G13D]        | WT   | 0.52           |
| 36   | HCC44     | [c.34G>T; p.G12C]        | WT   | 0.53           |
| 37   | H1299     | WT                       | WT   | 0.53           |
| 38   | H1568     | WT                       | WT   | 0.54           |
| 39   | H650      | [c.182A>T; p.Q61L]       | WT   | 0.54           |

|    |                |                        |    |      |
|----|----------------|------------------------|----|------|
| 40 | <b>H1993</b>   | WT                     | WT | 0.55 |
| 41 | <b>H2126</b>   | WT                     | WT | 0.55 |
| 42 | <b>HCC193</b>  | WT                     | WT | 0.55 |
| 43 | <b>H460</b>    | [c.183A>T; p.Q61H]     | WT | 0.57 |
| 44 | <b>Calu-1</b>  | [c.34G>T; p.G12C]      | WT | 0.57 |
| 45 | <b>H1838</b>   | WT                     | WT | 0.61 |
| 46 | <b>HCC15</b>   | WT                     | WT | 0.61 |
| 47 | <b>H1355</b>   | [c.37G>T; p.G13C]      | WT | 0.64 |
| 48 | <b>H2887</b>   | [c.35G>T; p.G12V]      | WT | 0.64 |
| 49 | <b>H324</b>    | WT                     | WT | 0.65 |
| 50 | <b>H2170</b>   | WT                     | WT | 0.66 |
| 51 | <b>HCC4017</b> | [c.35G>T; p.G12V]      | WT | 0.67 |
| 52 | <b>Calu-3</b>  | WT                     | WT | 0.67 |
| 53 | <b>H1734</b>   | [c.37G>T; p.G13C]      | WT | 0.68 |
| 54 | <b>H661</b>    | WT                     | WT | 0.68 |
| 55 | <b>H1819</b>   | WT                     | WT | 0.68 |
| 56 | <b>HCC366</b>  | WT                     | WT | 0.71 |
| 57 | <b>HCC78</b>   | WT                     | WT | 0.71 |
| 58 | <b>H2347</b>   | WT                     | WT | 0.72 |
| 59 | <b>H1666</b>   | WT                     | WT | 0.73 |
| 60 | <b>HOP-62</b>  | [c.34G>T; p.G12C]      | WT | 0.75 |
| 61 | <b>H1648</b>   | WT                     | WT | 0.76 |
| 62 | <b>H2291</b>   | [c.34_35GG>TT; p.G12F] | WT | 0.81 |
| 63 | <b>H441</b>    | [c.35G>T; p.G12V]      | WT | 0.82 |
| 64 | <b>H82</b>     | WT                     | WT | 0.82 |
| 65 | <b>H1373</b>   | [c.34G>T; p.G12C]      | WT | 0.89 |
| 66 | <b>H1792</b>   | [c.34G>T; p.G12C]      | WT | 0.89 |
| 67 | <b>H1781</b>   | WT                     | WT | 0.93 |
| 68 | <b>HCC1171</b> | [c.35G>T; p.G12V]      | WT | 0.95 |
