# Supplementary material
Source: PubMed Central journal article supplement (PMC3905243)
Supplement: NIHMS534085-supplement-3.pdf [file NIHMS534085-supplement-3.pdf]

**Supplementary Table 2:** Genes included in the sorafenib sensitivity signature

| Rank | Symbol   | Gene Name                                                                       | Direction   | Spearman rho | Spearman P-value |
|------|----------|---------------------------------------------------------------------------------|-------------|--------------|------------------|
| 1    | GRP      | Gastrin-releasing peptide                                                       | Sensitivity | -0.46        | 8.07E-05         |
| 2    | ACSF2    | Acyl-CoA synthetase family member 2                                             | Resistance  | 0.46         | 8.59E-05         |
| 3    | EDN1     | Endothelin 1                                                                    | Resistance  | 0.46         | 8.60E-05         |
| 4    | C7orf59  | Chromosome 7 open reading frame 59                                              | Sensitivity | -0.46        | 8.64E-05         |
| 5    | CD55     | CD55 molecule, decay accelerating factor for complement                         | Resistance  | 0.44         | 1.45E-04         |
| 6    | ALG14*   | Asparagine-linked glycosylation 14 homolog ( <i>S. cerevisiae</i> )             | Sensitivity | -0.44        | 1.73E-04         |
| 7    | COL12A1  | Collagen, type XII, alpha 1                                                     | Resistance  | 0.44         | 1.82E-04         |
| 8    | COL19A1  | Collagen, type XIX, alpha 1                                                     | Sensitivity | -0.44        | 2.09E-04         |
| 9    | SH3D19   | SH3 domain containing 19                                                        | Resistance  | 0.43         | 2.20E-04         |
| 10   | RAP2A    | RAP2A, member of RAS oncogene family                                            | Sensitivity | -0.43        | 2.28E-04         |
| 11   | PPP1R15A | Protein phosphatase 1, regulatory (inhibitor) subunit 15A                       | Resistance  | 0.43         | 2.91E-04         |
| 12   | SAT1     | Spermidine/spermine N1-acetyltransferase 1                                      | Resistance  | 0.42         | 3.31E-04         |
| 13   | ATP5J*   | ATP synthase, H <sup>+</sup> transporting, mitochondrial Fo complex, subunit F6 | Sensitivity | -0.42        | 3.46E-04         |
| 14   | NRIP1    | Nuclear receptor interacting protein 1                                          | Resistance  | 0.42         | 4.19E-04         |
| 15   | SFPQ     | Splicing factor proline/glutamine-rich                                          | Sensitivity | -0.42        | 4.23E-04         |
| 16   | REV1     | REV1 homolog ( <i>S. cerevisiae</i> )                                           | Resistance  | 0.41         | 4.45E-04         |
| 17   | MAPRE2   | Microtubule-associated protein, RP/EB family, member 2                          | Sensitivity | -0.41        | 4.98E-04         |
| 18   | SRA1     | Steroid receptor RNA activator 1                                                | Sensitivity | -0.41        | 4.99E-04         |
| 19   | PGAM5    | Phosphoglycerate mutase family member 5                                         | Sensitivity | -0.41        | 5.14E-04         |
| 20   | IGFBP7   | Insulin-like growth factor binding protein 7                                    | Resistance  | 0.41         | 5.20E-04         |
| 21   | GPRC5A   | G protein-coupled receptor, family C, group 5, member A                         | Resistance  | 0.41         | 5.21E-04         |
| 22   | MRPS16   | Mitochondrial ribosomal protein S16                                             | Sensitivity | -0.41        | 5.95E-04         |
| 23   | RBM14    | RNA binding motif protein 14                                                    | Sensitivity | -0.41        | 5.96E-04         |
| 24   | CD47     | CD47 molecule                                                                   | Resistance  | 0.41         | 6.05E-04         |
| 25   | ARHGAP24 | Rho GTPase activating protein 24                                                | Resistance  | 0.40         | 6.14E-04         |
| 26   | ACTL7B   | Actin-like 7B                                                                   | Resistance  | 0.40         | 6.40E-04         |
| 27   | CACNA1H* | Calcium channel, voltage-dependent, T type, alpha 1H subunit                    | Sensitivity | -0.40        | 7.04E-04         |

|    |          |                                                                  |             |       |          |
|----|----------|------------------------------------------------------------------|-------------|-------|----------|
| 28 | EFEMP1   | EGF-containing fibulin-like extracellular matrix protein 1       | Resistance  | 0.40  | 7.08E-04 |
| 29 | C15orf32 | Chromosome 15 open reading frame 32                              | Sensitivity | -0.40 | 7.35E-04 |
| 30 | OR8K1    | Olfactory receptor, family 8, subfamily K, member 1              | Resistance  | 0.40  | 7.38E-04 |
| 31 | PPARG    | Peroxisome proliferator-activated receptor gamma                 | Resistance  | 0.40  | 7.73E-04 |
| 32 | ALDH1A3  | Aldehyde dehydrogenase 1 family, member A3                       | Resistance  | 0.40  | 7.82E-04 |
| 33 | BOLA2    | BolA homolog 2 (E. coli)                                         | Sensitivity | -0.40 | 8.07E-04 |
| 34 | SYTL2    | Synaptotagmin-like 2                                             | Resistance  | 0.40  | 8.27E-04 |
| 35 | FGF1     | Fibroblast growth factor 1 (acidic)                              | Resistance  | 0.40  | 8.49E-04 |
| 36 | AIFM1    | Apoptosis-inducing factor, mitochondrion-associated, 1           | Sensitivity | -0.39 | 8.89E-04 |
| 37 | CLPB     | ClpB caseinolytic peptidase B homolog (E. coli)                  | Sensitivity | -0.39 | 9.01E-04 |
| 38 | LRRC8A   | Leucine rich repeat containing 8 family, member A                | Resistance  | 0.39  | 9.34E-04 |
| 39 | MUC6     | Mucin 6, oligomeric mucus/gel-forming                            | Resistance  | 0.39  | 9.53E-04 |
| 40 | DPP3     | Dipeptidyl-peptidase 3                                           | Sensitivity | -0.39 | 9.70E-04 |
| 41 | RNF41    | Ring finger protein 41                                           | Sensitivity | -0.39 | 9.82E-04 |
| 42 | MAFF     | V-maf musculoaponeurotic fibrosarcoma oncogene homolog F (avian) | Resistance  | 0.39  | 9.92E-04 |
| 43 | BARX1    | BARX homeobox 1                                                  | Sensitivity | -0.39 | 1.02E-03 |
| 44 | C9orf150 | Chromosome 9 open reading frame 150                              | Resistance  | 0.39  | 1.03E-03 |
| 45 | KIAA0564 | KIAA0564                                                         | Sensitivity | -0.39 | 1.04E-03 |
| 46 | FAM3B    | Family with sequence similarity 3, member B                      | Sensitivity | -0.39 | 1.04E-03 |
| 47 | CFH      | Complement factor H                                              | Resistance  | 0.39  | 1.04E-03 |

\*ALG14, ATP5J and CACNA1H were represented by 2 Illumina probes; the most significant probe is shown in the table.
