# Supplementary material
Source: PubMed Central journal article supplement (PMC3905243)
Supplement: NIHMS534085-supplement-4.pdf [file NIHMS534085-supplement-4.pdf]

**Supplementary Table 3: Sorafenib-related adverse events in more than 10% of the patients**

| Adverse Event      | Grade  |      |              |      |
|--------------------|--------|------|--------------|------|
|                    | Any    |      | Grade 3 or 4 |      |
|                    | Number | %    | Number       | %    |
| Hand/Food Syndrome | 62     | 59.6 | 17           | 16.3 |
| Fatigue            | 44     | 42.3 | 12           | 11.5 |
| Rash               | 42     | 40.4 | 7            | 6.7  |
| Diarrhea           | 40     | 38.5 | 3            | 2.9  |
| Weight Loss        | 40     | 38.5 | 0            | 0.0  |
| Pain               | 39     | 37.5 | 10           | 9.6  |
| Anorexia           | 33     | 31.7 | 2            | 1.9  |
| Anemia             | 28     | 26.9 | 3            | 2.9  |
| Dyspnea            | 27     | 26.0 | 9            | 8.7  |
| Hyperglycemia      | 26     | 25.0 | 3            | 2.9  |
| Nausea             | 25     | 24.0 | 3            | 2.9  |
| Hypertension       | 20     | 19.2 | 8            | 7.7  |
| Hyponatremia       | 20     | 19.2 | 5            | 4.8  |
