# Supplementary material
Source: PubMed Central journal article supplement (PMC3905243)
Supplement: NIHMS534085-supplement-5.pdf [file NIHMS534085-supplement-5.pdf]

**Supplementary Table 4:** Eight-week disease control rates by *EGFR* mutation status stratified by ECOG performance status (4a) and by the number of prior lines of therapy before inclusion in the trial (4b)

Table 4a:

| <b>ECOG</b> | <b><i>EGFR</i> mutation</b> | <b><i>EGFR</i> wild type</b> |
|-------------|-----------------------------|------------------------------|
| 0           | 0% (0/2)                    | 100% (2/2)                   |
| 1           | 22% (2/9)                   | 68% (39/57)                  |
| 2           | 50% (1/2)                   | 25% (2/8)                    |
| Total       | 23% (3/13)                  | 64% (43/67)                  |

Table 4b:

| <b>Prior treatments</b> | <b><i>EGFR</i> mutation</b> | <b><i>EGFR</i> wild type</b> |
|-------------------------|-----------------------------|------------------------------|
| 0-1                     | 0% (0/2)                    | 43% (6/14)                   |
| >=2                     | 27% (3/11)                  | 70% (37/53)                  |
| Total                   | 23% (3/13)                  | 64% (43/67)                  |
