# Supplementary material
Source: PubMed Central journal article supplement (PMC3905243)
Supplement: NIHMS534085-supplement-7.pdf [file NIHMS534085-supplement-7.pdf]

| NAME      | SIZE | ES       | NES      | NOM p-val | FDR q-val | FWER p-val |
|-----------|------|----------|----------|-----------|-----------|------------|
| REACTOME  | 125  | -0.55655 | -2.74025 | 0         | 0         | 0          |
| SOTIRIOU_ | 145  | -0.52566 | -2.64629 | 0         | 0         | 0          |
| REACTOME  | 94   | -0.56226 | -2.62514 | 0         | 0         | 0          |
| REACTOME  | 36   | -0.66227 | -2.52258 | 0         | 0         | 0          |
| REACTOME  | 49   | -0.60874 | -2.48902 | 0         | 0         | 0          |
| KEGG_SPLI | 115  | -0.514   | -2.48888 | 0         | 0         | 0          |
| REACTOME  | 95   | -0.51238 | -2.42643 | 0         | 0         | 0          |
| LIN_MELAN | 65   | -0.56022 | -2.41519 | 0         | 0         | 0          |
| REACTOME  | 121  | -0.49356 | -2.40155 | 0         | 0         | 0          |
| KANG_DOX  | 51   | -0.57719 | -2.39718 | 0         | 0         | 0          |
| REACTOME  | 301  | -0.42857 | -2.37088 | 0         | 6.02E-05  | 0.001      |
| MANALO_H  | 278  | -0.43355 | -2.36015 | 0         | 1.11E-04  | 0.002      |
| EGUCHI_CE | 19   | -0.72905 | -2.35963 | 0         | 1.02E-04  | 0.002      |
| STARK_HYF | 17   | -0.73707 | -2.34288 | 0         | 9.48E-05  | 0.002      |
| REACTOME  | 155  | -0.46201 | -2.33805 | 0         | 8.85E-05  | 0.002      |
| REACTOME  | 139  | -0.47237 | -2.33558 | 0         | 8.30E-05  | 0.002      |
| GRAHAM_I  | 85   | -0.50259 | -2.3004  | 0         | 1.56E-04  | 0.004      |
| ROSTY_CEF | 138  | -0.46774 | -2.28621 | 0         | 1.84E-04  | 0.005      |
| REACTOME  | 102  | -0.48181 | -2.28599 | 0         | 1.75E-04  | 0.005      |
| REACTOME  | 76   | -0.50154 | -2.26759 | 0         | 2.98E-04  | 0.009      |
| REACTOME  | 89   | -0.49507 | -2.25798 | 0         | 3.76E-04  | 0.012      |
| REN_BOUN  | 47   | -0.558   | -2.24647 | 0         | 4.19E-04  | 0.014      |
| GRAHAM_C  | 176  | -0.44021 | -2.24629 | 0         | 4.01E-04  | 0.014      |
| REACTOME  | 31   | -0.61084 | -2.23804 | 0         | 4.12E-04  | 0.015      |
| REACTOME  | 31   | -0.60372 | -2.21814 | 0         | 4.23E-04  | 0.016      |
| CROONQUI  | 80   | -0.48068 | -2.21813 | 0         | 4.07E-04  | 0.016      |
| BLUM_RES  | 323  | -0.39737 | -2.21595 | 0         | 4.16E-04  | 0.017      |
| REACTOME  | 102  | -0.47113 | -2.2098  | 0         | 4.49E-04  | 0.019      |
| ELVIDGE_H | 65   | -0.51089 | -2.20581 | 0         | 4.34E-04  | 0.019      |
| REACTOME  | 20   | -0.66605 | -2.20379 | 0         | 4.41E-04  | 0.02       |
| ELVIDGE_H | 57   | -0.5072  | -2.18638 | 0         | 5.53E-04  | 0.026      |
| REACTOME  | 29   | -0.60805 | -2.18269 | 0         | 5.36E-04  | 0.026      |
| KORKOLA_  | 20   | -0.67423 | -2.18258 | 0         | 5.20E-04  | 0.026      |

|            |     |          |          |          |          |       |
|------------|-----|----------|----------|----------|----------|-------|
| MOOTHA_`   | 15  | -0.71281 | -2.18246 | 0        | 5.04E-04 | 0.026 |
| ELVIDGE_H  | 40  | -0.55612 | -2.17673 | 0        | 5.28E-04 | 0.028 |
| REACTOME   | 61  | -0.50472 | -2.16168 | 0        | 6.42E-04 | 0.035 |
| PUJANA_BI  | 53  | -0.52098 | -2.15661 | 0        | 6.60E-04 | 0.037 |
| ZHAN_MUI   | 43  | -0.55113 | -2.15495 | 0        | 6.43E-04 | 0.037 |
| RICKMAN_`  | 38  | -0.56283 | -2.13946 | 0        | 8.13E-04 | 0.048 |
| REACTOME   | 42  | -0.54038 | -2.13784 | 0        | 8.10E-04 | 0.048 |
| AMUNDSO    | 36  | -0.56231 | -2.13397 | 0        | 8.06E-04 | 0.049 |
| REACTOME   | 30  | -0.59101 | -2.13334 | 0        | 7.87E-04 | 0.049 |
| REACTOME   | 29  | -0.59482 | -2.1312  | 0        | 7.84E-04 | 0.05  |
| REACTOME   | 29  | -0.59108 | -2.13067 | 0        | 7.66E-04 | 0.05  |
| RICKMAN_`  | 38  | -0.56283 | -2.11357 | 0        | 9.23E-04 | 0.061 |
| FARMER_B   | 33  | -0.5661  | -2.11301 | 0        | 9.18E-04 | 0.062 |
| REACTOME   | 58  | -0.49766 | -2.10655 | 0        | 0.001022 | 0.07  |
| REACTOME   | 38  | -0.5507  | -2.09497 | 0        | 0.001192 | 0.084 |
| KEGG_OXII  | 109 | -0.4356  | -2.09407 | 0        | 0.001181 | 0.085 |
| PUJANA_XI  | 162 | -0.40789 | -2.08641 | 0        | 0.001302 | 0.095 |
| REACTOME   | 140 | -0.42067 | -2.07335 | 0        | 0.001509 | 0.111 |
| WHITEFOR   | 92  | -0.43882 | -2.06715 | 0        | 0.001555 | 0.116 |
| REACTOME   | 21  | -0.62557 | -2.06127 | 0        | 0.001688 | 0.127 |
| REACTOME   | 37  | -0.55281 | -2.05606 | 0        | 0.001755 | 0.135 |
| LEE_EARLY_ | 80  | -0.47016 | -2.05472 | 0        | 0.001782 | 0.14  |
| REACTOME   | 110 | -0.43298 | -2.05446 | 0        | 0.00175  | 0.14  |
| LI_WILMS_  | 156 | -0.40357 | -2.05028 | 0        | 0.001778 | 0.144 |
| REACTOME   | 18  | -0.64895 | -2.04005 | 0        | 0.002031 | 0.166 |
| FRASOR_RI  | 42  | -0.52092 | -2.03466 | 0.002532 | 0.002207 | 0.184 |
| REACTOME   | 32  | -0.55064 | -2.03404 | 0        | 0.00218  | 0.184 |
| REACTOME   | 90  | -0.43535 | -2.0299  | 0        | 0.002274 | 0.194 |
| FUJII_YBX1 | 137 | -0.4055  | -2.02603 | 0        | 0.002332 | 0.201 |
| GARGALOV   | 52  | -0.48985 | -2.02461 | 0        | 0.002377 | 0.207 |
| REACTOME   | 40  | -0.52033 | -2.02326 | 0        | 0.00237  | 0.21  |
| FINETTI_BF | 15  | -0.67495 | -2.02309 | 0.004444 | 0.002344 | 0.211 |
| REACTOME   | 30  | -0.54995 | -2.02175 | 0.00241  | 0.002358 | 0.214 |
| REACTOME   | 28  | -0.55935 | -2.01422 | 0        | 0.00251  | 0.23  |

|            |     |          |          |          |          |       |
|------------|-----|----------|----------|----------|----------|-------|
| KEGG_PAR   | 104 | -0.42296 | -2.01306 | 0        | 0.002511 | 0.233 |
| REACTOME   | 19  | -0.62578 | -2.00953 | 0        | 0.00261  | 0.246 |
| FINETTI_BF | 15  | -0.67495 | -1.99812 | 0.002404 | 0.002949 | 0.28  |
| PUJANA_BI  | 405 | -0.35041 | -1.99543 | 0        | 0.003056 | 0.292 |
| REACTOME   | 63  | -0.46302 | -1.9845  | 0        | 0.003533 | 0.33  |
| REACTOME   | 88  | -0.43103 | -1.97853 | 0        | 0.003784 | 0.351 |
| KEGG_HUN   | 160 | -0.38861 | -1.97728 | 0        | 0.00375  | 0.353 |
| ELVIDGE_H  | 138 | -0.39125 | -1.96956 | 0        | 0.003964 | 0.367 |
| MOOTHA_'   | 77  | -0.44011 | -1.96424 | 0        | 0.00411  | 0.379 |
| REACTOME   | 43  | -0.49137 | -1.9545  | 0.002571 | 0.004482 | 0.408 |
| WONG_EV    | 328 | -0.34703 | -1.94062 | 0        | 0.005108 | 0.455 |
| REACTOME   | 31  | -0.53034 | -1.93899 | 0.002475 | 0.005135 | 0.464 |
| MUELLER_I  | 290 | -0.35169 | -1.93722 | 0        | 0.005203 | 0.471 |
| KEGG_AMI   | 41  | -0.48037 | -1.92455 | 0        | 0.005764 | 0.514 |
| REACTOME   | 71  | -0.43518 | -1.92331 | 0        | 0.005766 | 0.519 |
| REACTOME   | 191 | -0.36906 | -1.9215  | 0        | 0.005791 | 0.523 |
| SHEDDEN_   | 442 | -0.33228 | -1.91905 | 0        | 0.005886 | 0.536 |
| REACTOME   | 57  | -0.45632 | -1.91756 | 0        | 0.005894 | 0.542 |
| REACTOME   | 27  | -0.55348 | -1.91689 | 0        | 0.005841 | 0.544 |
| TARTE_PLA  | 298 | -0.3465  | -1.91213 | 0        | 0.006036 | 0.566 |
| REACTOME   | 43  | -0.4864  | -1.90202 | 0        | 0.006667 | 0.608 |
| REACTOME   | 52  | -0.45673 | -1.89931 | 0        | 0.006753 | 0.618 |
| KEGG_DNA   | 36  | -0.50588 | -1.89736 | 0        | 0.006838 | 0.63  |
| COLDREN_I  | 81  | -0.41848 | -1.88472 | 0        | 0.007893 | 0.683 |
| REACTOME   | 63  | -0.43494 | -1.87997 | 0        | 0.008203 | 0.7   |
| MOOTHA_I   | 22  | -0.56206 | -1.86101 | 0.002538 | 0.009678 | 0.758 |
| PENG_RAP   | 70  | -0.41829 | -1.86099 | 0        | 0.009575 | 0.758 |
| REACTOME   | 47  | -0.45246 | -1.85953 | 0        | 0.00962  | 0.763 |
| REACTOME   | 48  | -0.45528 | -1.84612 | 0.002564 | 0.010915 | 0.811 |
| KEGG_RNA   | 26  | -0.51225 | -1.84054 | 0.00232  | 0.01143  | 0.827 |
| REACTOME   | 22  | -0.5553  | -1.84044 | 0.002392 | 0.01134  | 0.828 |
| REACTOME   | 208 | -0.34632 | -1.82168 | 0        | 0.013309 | 0.874 |
| REACTOME   | 101 | -0.38631 | -1.82098 | 0.002899 | 0.013282 | 0.879 |
| PUJANA_BI  | 91  | -0.39065 | -1.82039 | 0        | 0.013235 | 0.882 |

|            |     |          |          |          |          |       |
|------------|-----|----------|----------|----------|----------|-------|
| REACTOME   | 17  | -0.59264 | -1.81667 | 0.016204 | 0.013573 | 0.892 |
| HOFFMANI   | 92  | -0.38917 | -1.81459 | 0        | 0.013709 | 0.897 |
| MITSIADES  | 237 | -0.33632 | -1.81296 | 0        | 0.013735 | 0.901 |
| CROONQUI   | 62  | -0.41616 | -1.81005 | 0.002584 | 0.01388  | 0.904 |
| NIKOLSKY_  | 116 | -0.36857 | -1.80708 | 0        | 0.014158 | 0.91  |
| ZHAN_VAR   | 27  | -0.5141  | -1.80592 | 0        | 0.014197 | 0.912 |
| KEGG_CELL  | 122 | -0.37333 | -1.80224 | 0        | 0.014539 | 0.918 |
| SCIAN_CEL  | 22  | -0.54704 | -1.79989 | 0.004963 | 0.014719 | 0.918 |
| BIDUS_ME   | 202 | -0.34068 | -1.79619 | 0        | 0.015053 | 0.923 |
| MOOTHA_I   | 411 | -0.31083 | -1.79499 | 0        | 0.015152 | 0.927 |
| PAL_PRMT   | 178 | -0.34692 | -1.7912  | 0        | 0.01558  | 0.935 |
| MISSIAGLI  | 93  | -0.39019 | -1.78953 | 0        | 0.015646 | 0.936 |
| REACTOME   | 25  | -0.50861 | -1.77834 | 0.005038 | 0.017101 | 0.95  |
| REACTOME   | 33  | -0.47417 | -1.7731  | 0.002597 | 0.017699 | 0.955 |
| REACTOME   | 118 | -0.36427 | -1.77263 | 0        | 0.017644 | 0.955 |
| NADERI_BF  | 36  | -0.46775 | -1.77118 | 0.0025   | 0.017696 | 0.956 |
| KAUFFMAN   | 125 | -0.36284 | -1.77109 | 0        | 0.017557 | 0.956 |
| MOLENAAF   | 55  | -0.4233  | -1.77053 | 0        | 0.017459 | 0.956 |
| WONG_MI    | 203 | -0.33789 | -1.76697 | 0        | 0.017833 | 0.961 |
| YAO_TEMP   | 153 | -0.34597 | -1.76469 | 0        | 0.017983 | 0.962 |
| WALLACE_   | 21  | -0.53721 | -1.76175 | 0.009828 | 0.018309 | 0.968 |
| FERREIRA_I | 146 | -0.34992 | -1.76153 | 0        | 0.018214 | 0.969 |
| REACTOME   | 21  | -0.5219  | -1.76146 | 0        | 0.018077 | 0.969 |
| REACTOME   | 179 | -0.33964 | -1.75643 | 0        | 0.018725 | 0.975 |
| REACTOME   | 52  | -0.41598 | -1.75078 | 0.002445 | 0.019427 | 0.977 |
| KOBAYASH   | 242 | -0.32363 | -1.7462  | 0        | 0.020124 | 0.983 |
| REACTOME   | 82  | -0.38457 | -1.74591 | 0        | 0.019998 | 0.983 |
| TOYOTA_T   | 430 | -0.30858 | -1.74281 | 0        | 0.020352 | 0.983 |
| CHEMNITZ   | 133 | -0.35172 | -1.74009 | 0        | 0.020682 | 0.985 |
| REACTOME   | 46  | -0.43664 | -1.73852 | 0.013158 | 0.020835 | 0.986 |
| KEGG_RNA   | 57  | -0.41392 | -1.73289 | 0.0025   | 0.021616 | 0.987 |
| REACTOME   | 20  | -0.52728 | -1.72663 | 0.004525 | 0.022657 | 0.992 |
| REACTOME   | 58  | -0.40167 | -1.72541 | 0        | 0.022688 | 0.992 |
| BOYVAULT_I | 186 | -0.32474 | -1.71045 | 0        | 0.025317 | 0.996 |

|           |     |          |          |          |          |       |
|-----------|-----|----------|----------|----------|----------|-------|
| RHODES_U  | 59  | -0.39453 | -1.69621 | 0.002415 | 0.028466 | 0.997 |
| WINNEPEN  | 160 | -0.33364 | -1.69509 | 0        | 0.028533 | 0.998 |
| REACTOME  | 174 | -0.33115 | -1.69495 | 0        | 0.028349 | 0.998 |
| NIKOLSKY_ | 24  | -0.50634 | -1.69325 | 0.015228 | 0.028544 | 0.998 |
| REACTOME  | 15  | -0.54133 | -1.69227 | 0.017429 | 0.028579 | 0.998 |
| REACTOME  | 28  | -0.46835 | -1.68904 | 0.006881 | 0.029084 | 0.998 |
| REACTOME  | 61  | -0.38769 | -1.682   | 0.00554  | 0.030758 | 0.999 |
| RORIE_TAR | 22  | -0.49699 | -1.68078 | 0.011628 | 0.030873 | 0.999 |
| SONG_TAR  | 49  | -0.40768 | -1.68001 | 0        | 0.030818 | 0.999 |
| MARKEY_R  | 199 | -0.32164 | -1.67955 | 0        | 0.030697 | 0.999 |
| REACTOME  | 46  | -0.41999 | -1.66053 | 0.005319 | 0.035689 | 1     |
| PYEON_HP  | 85  | -0.36185 | -1.65934 | 0.005319 | 0.035764 | 1     |
| REACTOME  | 70  | -0.37673 | -1.65815 | 0        | 0.035903 | 1     |
| RHODES_C  | 54  | -0.38774 | -1.65779 | 0.007444 | 0.035746 | 1     |
| REACTOME  | 81  | -0.36287 | -1.64988 | 0.00565  | 0.037785 | 1     |
| REACTOME  | 46  | -0.41111 | -1.64688 | 0        | 0.038371 | 1     |
| KEGG_PRO  | 44  | -0.41485 | -1.64573 | 0.015152 | 0.038395 | 1     |
| MORI_IMV  | 51  | -0.40186 | -1.64445 | 0.005236 | 0.038608 | 1     |
| RASHI_RES | 42  | -0.41317 | -1.63846 | 0.007979 | 0.040157 | 1     |
| NAKAYAM/  | 72  | -0.36398 | -1.63374 | 0        | 0.041363 | 1     |
| MOOTHA_I  | 430 | -0.28515 | -1.62534 | 0        | 0.043618 | 1     |
| WEST_ADR  | 282 | -0.29614 | -1.6246  | 0        | 0.043567 | 1     |
| WU_APOP   | 37  | -0.42788 | -1.61988 | 0.014528 | 0.044875 | 1     |
| CHEOK_RE  | 25  | -0.46556 | -1.61586 | 0.023316 | 0.045887 | 1     |
| HORIUCHI_ | 290 | -0.29435 | -1.61128 | 0        | 0.047216 | 1     |
| REACTOME  | 70  | -0.36422 | -1.59982 | 0.008287 | 0.050955 | 1     |
| DANG_REG  | 64  | -0.37732 | -1.59229 | 0.002488 | 0.053539 | 1     |
| LY_AGING_ | 24  | -0.45639 | -1.58548 | 0.020305 | 0.055972 | 1     |
| MORI_EML  | 90  | -0.34686 | -1.58308 | 0.003021 | 0.05671  | 1     |
| MORI_LAR  | 51  | -0.39142 | -1.58277 | 0.015385 | 0.056485 | 1     |
| REACTOME  | 58  | -0.37486 | -1.57437 | 0        | 0.059632 | 1     |
| PENG_GLU  | 84  | -0.33829 | -1.5739  | 0.002809 | 0.05951  | 1     |
| KEGG_ALZ  | 150 | -0.31412 | -1.57221 | 0        | 0.059914 | 1     |
| KEGG_TER  | 15  | -0.51228 | -1.56809 | 0.022831 | 0.06149  | 1     |

|            |     |          |          |          |          |   |
|------------|-----|----------|----------|----------|----------|---|
| WEST_ADR   | 17  | -0.49415 | -1.56603 | 0.034404 | 0.062003 | 1 |
| HEDENFALI  | 28  | -0.44484 | -1.56228 | 0.017073 | 0.063351 | 1 |
| BENPORAT   | 40  | -0.40213 | -1.55801 | 0.029703 | 0.065021 | 1 |
| LEE_META   | 15  | -0.51251 | -1.54958 | 0.0311   | 0.068575 | 1 |
| ODONNELL   | 130 | -0.31487 | -1.54591 | 0        | 0.069861 | 1 |
| REACTOME   | 18  | -0.49275 | -1.54575 | 0.036952 | 0.069541 | 1 |
| BIOCARTA_  | 18  | -0.50972 | -1.54529 | 0.041379 | 0.06937  | 1 |
| YU_MYC_T   | 37  | -0.39888 | -1.5436  | 0.02439  | 0.069819 | 1 |
| LINDGREN_  | 322 | -0.2752  | -1.53803 | 0        | 0.072253 | 1 |
| REACTOME   | 15  | -0.50496 | -1.53571 | 0.045558 | 0.073232 | 1 |
| REACTOME   | 405 | -0.26913 | -1.52998 | 0        | 0.075736 | 1 |
| REACTOME   | 18  | -0.48533 | -1.52941 | 0.042755 | 0.075591 | 1 |
| GINESTIER_ | 158 | -0.30336 | -1.52051 | 0.003247 | 0.079907 | 1 |
| FOURNIER_  | 267 | -0.27693 | -1.50636 | 0        | 0.087572 | 1 |
| REACTOME   | 57  | -0.35468 | -1.50513 | 0.008043 | 0.087836 | 1 |
| BIOCARTA_  | 15  | -0.48021 | -1.50372 | 0.064677 | 0.088143 | 1 |
| RHEIN_ALL  | 353 | -0.26493 | -1.49911 | 0        | 0.090431 | 1 |
| GUENTHER   | 21  | -0.44732 | -1.49439 | 0.046272 | 0.092947 | 1 |
| REACTOME   | 48  | -0.37103 | -1.49028 | 0.021108 | 0.095137 | 1 |
| LY_AGING_  | 15  | -0.496   | -1.48713 | 0.0525   | 0.096657 | 1 |
| NIKOLSKY_  | 153 | -0.29387 | -1.48521 | 0        | 0.097427 | 1 |
| REACTOME   | 31  | -0.40794 | -1.48381 | 0.04359  | 0.097871 | 1 |
| CHANG_CY   | 48  | -0.36516 | -1.48335 | 0.027569 | 0.097665 | 1 |
| REACTOME   | 27  | -0.41891 | -1.47235 | 0.038462 | 0.104456 | 1 |
| NAKAYAMA   | 86  | -0.32297 | -1.46981 | 0.008065 | 0.105748 | 1 |
| BOYALT_I   | 51  | -0.36264 | -1.46582 | 0.035443 | 0.108085 | 1 |
| STARK_PRE  | 427 | -0.25755 | -1.46304 | 0        | 0.109608 | 1 |
| REACTOME   | 17  | -0.46395 | -1.46202 | 0.056471 | 0.109802 | 1 |
| BIOCARTA_  | 24  | -0.41719 | -1.46135 | 0.050549 | 0.109738 | 1 |
| ZHANG_RE   | 58  | -0.34628 | -1.46087 | 0.035714 | 0.109563 | 1 |
| ACEVEDO_   | 349 | -0.25912 | -1.46058 | 0        | 0.109192 | 1 |
| SPIELMAN_  | 460 | -0.25389 | -1.45726 | 0        | 0.110978 | 1 |
| LY_AGING_  | 47  | -0.35652 | -1.45612 | 0.037333 | 0.111267 | 1 |
| HANN_RES   | 33  | -0.38717 | -1.45552 | 0.055072 | 0.111171 | 1 |

|            |     |          |          |          |          |   |
|------------|-----|----------|----------|----------|----------|---|
| BENPORAT   | 146 | -0.29003 | -1.45507 | 0.017857 | 0.110977 | 1 |
| KEGG_CITR  | 30  | -0.4004  | -1.45373 | 0.052885 | 0.11137  | 1 |
| KAUFFMAN   | 56  | -0.34    | -1.44602 | 0.013477 | 0.116575 | 1 |
| HUMMEL_I   | 40  | -0.3744  | -1.44511 | 0.037825 | 0.116694 | 1 |
| REACTOME   | 117 | -0.29773 | -1.44169 | 0.011561 | 0.118634 | 1 |
| REACTOME   | 102 | -0.30121 | -1.42283 | 0.016393 | 0.133777 | 1 |
| WATTEL_A   | 21  | -0.4297  | -1.42254 | 0.084507 | 0.133365 | 1 |
| REACTOME   | 20  | -0.43854 | -1.42243 | 0.076566 | 0.132839 | 1 |
| TANG_SEN   | 39  | -0.36272 | -1.41943 | 0.051213 | 0.134721 | 1 |
| GAUSSMAN   | 26  | -0.40608 | -1.41881 | 0.080189 | 0.13457  | 1 |
| DAIRKEE_C  | 46  | -0.3496  | -1.40537 | 0.054124 | 0.145417 | 1 |
| STEIN_ESRI | 41  | -0.35198 | -1.40403 | 0.049875 | 0.145868 | 1 |
| CAFFAREL_  | 25  | -0.40949 | -1.40251 | 0.060533 | 0.146515 | 1 |
| REACTOME   | 15  | -0.47757 | -1.40093 | 0.089835 | 0.14743  | 1 |
| REACTOME   | 36  | -0.3641  | -1.40074 | 0.053846 | 0.146922 | 1 |
| SUNG_MET   | 52  | -0.33765 | -1.39908 | 0.034314 | 0.147919 | 1 |
| REACTOME   | 23  | -0.418   | -1.39672 | 0.086331 | 0.149451 | 1 |
| ZHANG_BR   | 365 | -0.24786 | -1.39156 | 0        | 0.153489 | 1 |
| LE_EGR2_T  | 97  | -0.29862 | -1.38997 | 0.022535 | 0.154328 | 1 |
| SHEPARD_I  | 59  | -0.32326 | -1.38674 | 0.049261 | 0.156783 | 1 |
| MATTIOLI_  | 102 | -0.29171 | -1.38392 | 0.017291 | 0.158848 | 1 |
| SLEBOS_HE  | 75  | -0.31216 | -1.38157 | 0.040346 | 0.160242 | 1 |
| FOURNIER_  | 21  | -0.41442 | -1.3798  | 0.100218 | 0.161386 | 1 |
| GEORGES_I  | 58  | -0.31799 | -1.37776 | 0.053708 | 0.162713 | 1 |
| REACTOME   | 107 | -0.28981 | -1.37672 | 0.035813 | 0.163054 | 1 |
| CAFFAREL_  | 48  | -0.33776 | -1.3723  | 0.047619 | 0.166773 | 1 |
| MCCLUNG_   | 40  | -0.35309 | -1.37194 | 0.057416 | 0.166375 | 1 |
| REACTOME   | 48  | -0.34055 | -1.37147 | 0.061625 | 0.166207 | 1 |
| REACTOME   | 18  | -0.4346  | -1.37115 | 0.099515 | 0.165803 | 1 |
| BIOCARTA_  | 19  | -0.42653 | -1.37035 | 0.099548 | 0.165904 | 1 |
| REACTOME   | 21  | -0.41378 | -1.36945 | 0.101205 | 0.166128 | 1 |
| REACTOME   | 18  | -0.43028 | -1.36931 | 0.087167 | 0.165591 | 1 |
| WONG_PRI   | 46  | -0.34491 | -1.3693  | 0.057221 | 0.164889 | 1 |
| STEIN_ESRI | 373 | -0.24326 | -1.36755 | 0.00431  | 0.165955 | 1 |

|            |     |          |          |          |          |   |
|------------|-----|----------|----------|----------|----------|---|
| MORI_MA1   | 55  | -0.32077 | -1.358   | 0.06599  | 0.175263 | 1 |
| CHANG_CC   | 68  | -0.3063  | -1.35511 | 0.036269 | 0.177524 | 1 |
| MENSSEN_   | 16  | -0.44033 | -1.35207 | 0.104651 | 0.180061 | 1 |
| BILD_E2F3_ | 223 | -0.24967 | -1.34972 | 0.006969 | 0.181859 | 1 |
| CHIANG_LI' | 155 | -0.26919 | -1.34942 | 0.022082 | 0.18143  | 1 |
| RAMASWA    | 60  | -0.3131  | -1.34134 | 0.046997 | 0.18975  | 1 |
| MCCLUNG_   | 44  | -0.33897 | -1.34001 | 0.077108 | 0.190437 | 1 |
| REACTOME   | 15  | -0.44581 | -1.33689 | 0.126829 | 0.193337 | 1 |
| DEBIASI_AF | 222 | -0.25485 | -1.33364 | 0.023026 | 0.196325 | 1 |
| CHARAFE_I  | 351 | -0.23951 | -1.33323 | 0        | 0.195993 | 1 |
| REACTOME   | 17  | -0.43707 | -1.33035 | 0.128806 | 0.198732 | 1 |
| GARY_CD5_  | 408 | -0.23552 | -1.33031 | 0.004016 | 0.197981 | 1 |
| BIOCARTA_  | 33  | -0.36143 | -1.33008 | 0.106383 | 0.197462 | 1 |
| GARCIA_TA  | 146 | -0.26412 | -1.33001 | 0.009434 | 0.19674  | 1 |
| REACTOME   | 30  | -0.36343 | -1.32841 | 0.104167 | 0.197813 | 1 |
| GAZDA_DI/  | 61  | -0.30781 | -1.32792 | 0.070461 | 0.197618 | 1 |
| ODONNELL   | 43  | -0.3368  | -1.32707 | 0.087766 | 0.197815 | 1 |
| NIKOLSKY_  | 128 | -0.26759 | -1.3266  | 0.040698 | 0.19759  | 1 |
| KEGG_OOC   | 111 | -0.27794 | -1.32466 | 0.038576 | 0.199153 | 1 |
| GRADE_CO   | 214 | -0.2524  | -1.3234  | 0.02069  | 0.199957 | 1 |
| REACTOME   | 39  | -0.34065 | -1.32031 | 0.107769 | 0.20284  | 1 |
| REACTOME   | 27  | -0.36733 | -1.31877 | 0.109453 | 0.203999 | 1 |
| CONCANN    | 160 | -0.25708 | -1.31672 | 0.027108 | 0.205691 | 1 |
| FARMER_B   | 16  | -0.41737 | -1.3136  | 0.125296 | 0.208714 | 1 |
| CERVERA_Š  | 33  | -0.35598 | -1.31273 | 0.109948 | 0.208949 | 1 |
| BENPORAT   | 372 | -0.22953 | -1.31149 | 0.004329 | 0.209664 | 1 |
| HEIDENBLA  | 27  | -0.3733  | -1.3094  | 0.120192 | 0.21139  | 1 |
| REACTOME   | 42  | -0.33417 | -1.30738 | 0.084337 | 0.213212 | 1 |
| NIKOLSKY_  | 38  | -0.33018 | -1.30564 | 0.111386 | 0.214583 | 1 |
| CHOI_ATL_  | 33  | -0.34484 | -1.30539 | 0.106635 | 0.214103 | 1 |
| REACTOME   | 15  | -0.43088 | -1.30465 | 0.14128  | 0.214176 | 1 |
| KEGG_MISI  | 23  | -0.37812 | -1.29573 | 0.124694 | 0.224798 | 1 |
| SU_TESTIS  | 75  | -0.28785 | -1.29037 | 0.065089 | 0.231114 | 1 |
| VANTVEER_  | 103 | -0.27445 | -1.28972 | 0.062323 | 0.231188 | 1 |



|            |     |          |          |          |          |   |
|------------|-----|----------|----------|----------|----------|---|
| KAUFFMAN   | 201 | -0.24722 | -1.28933 | 0.041237 | 0.230875 | 1 |
| LOCKWOOI   | 167 | -0.24902 | -1.28914 | 0.031884 | 0.230245 | 1 |
| REACTOME   | 32  | -0.35128 | -1.28704 | 0.112245 | 0.232213 | 1 |
| REACTOME   | 160 | -0.25642 | -1.28606 | 0.035336 | 0.232642 | 1 |
| WELCSH_B   | 121 | -0.26344 | -1.27697 | 0.050147 | 0.244145 | 1 |
| CREIGHTON  | 22  | -0.38052 | -1.27551 | 0.15814  | 0.24532  | 1 |
| REACTOME   | 71  | -0.29004 | -1.27472 | 0.075145 | 0.245569 | 1 |
| CROMER_T   | 42  | -0.32377 | -1.26887 | 0.130542 | 0.25308  | 1 |
| REACTOME   | 15  | -0.41691 | -1.264   | 0.156951 | 0.259331 | 1 |
| CHEN_NEU   | 45  | -0.31277 | -1.25959 | 0.121655 | 0.264996 | 1 |
| BIOCARTA_  | 22  | -0.37876 | -1.25951 | 0.155251 | 0.264178 | 1 |
| REACTOME   | 26  | -0.35292 | -1.25899 | 0.159314 | 0.264071 | 1 |
| REACTOME   | 15  | -0.42137 | -1.25768 | 0.184685 | 0.265185 | 1 |
| VECCHI_GA  | 400 | -0.22263 | -1.25389 | 0.008511 | 0.270021 | 1 |
| JAIN_NFKB  | 71  | -0.27863 | -1.24928 | 0.115903 | 0.2761   | 1 |
| WEIGEL_O   | 34  | -0.32984 | -1.24847 | 0.141148 | 0.276352 | 1 |
| YAO_TEMP   | 62  | -0.28902 | -1.24728 | 0.117808 | 0.277215 | 1 |
| MOOTHA_I   | 323 | -0.22331 | -1.24473 | 0.027451 | 0.280468 | 1 |
| NIKOLSKY_  | 91  | -0.26968 | -1.24345 | 0.089337 | 0.281601 | 1 |
| REACTOME   | 27  | -0.35287 | -1.24233 | 0.157277 | 0.282348 | 1 |
| REACTOME   | 30  | -0.34265 | -1.24161 | 0.175711 | 0.282533 | 1 |
| RICKMAN_   | 318 | -0.22296 | -1.23832 | 0.023438 | 0.286859 | 1 |
| YAO_TEMP   | 127 | -0.25316 | -1.23675 | 0.078125 | 0.288393 | 1 |
| BIOCARTA_  | 18  | -0.38651 | -1.23209 | 0.196217 | 0.294741 | 1 |
| REACTOME   | 21  | -0.36894 | -1.23053 | 0.181604 | 0.296208 | 1 |
| REACTOME   | 18  | -0.3887  | -1.22885 | 0.191943 | 0.298081 | 1 |
| MONNIER_   | 342 | -0.22112 | -1.2287  | 0.02381  | 0.297296 | 1 |
| BIOCARTA_  | 15  | -0.4104  | -1.22496 | 0.196759 | 0.302306 | 1 |
| PELLICCIOT | 48  | -0.30328 | -1.22332 | 0.145408 | 0.304016 | 1 |
| IVANOVA_I  | 99  | -0.2616  | -1.22309 | 0.1      | 0.30339  | 1 |
| HOLLMAN_   | 193 | -0.23493 | -1.22197 | 0.068404 | 0.30428  | 1 |
| REACTOME   | 47  | -0.30578 | -1.22065 | 0.15869  | 0.305484 | 1 |
| REACTOME   | 23  | -0.35375 | -1.21752 | 0.179028 | 0.309765 | 1 |
| BOYLAN_M   | 34  | -0.32231 | -1.21636 | 0.167883 | 0.310758 | 1 |

|            |     |          |          |          |          |   |
|------------|-----|----------|----------|----------|----------|---|
| LASTOWSK   | 169 | -0.23573 | -1.21591 | 0.050955 | 0.310527 | 1 |
| ROME_INS   | 50  | -0.29764 | -1.21067 | 0.176611 | 0.318531 | 1 |
| KEGG_CAR   | 71  | -0.27248 | -1.2099  | 0.133858 | 0.318872 | 1 |
| LEE_LIVER_ | 124 | -0.24663 | -1.20763 | 0.096154 | 0.321875 | 1 |
| YAO_TEMP   | 15  | -0.40845 | -1.20558 | 0.218225 | 0.324491 | 1 |
| BORCZUK_   | 290 | -0.21832 | -1.20551 | 0.050781 | 0.323591 | 1 |
| BLALOCK_/  | 160 | -0.23765 | -1.20514 | 0.113269 | 0.323193 | 1 |
| WALLACE_   | 17  | -0.3868  | -1.20137 | 0.222727 | 0.328736 | 1 |
| CHIANG_LI' | 32  | -0.32625 | -1.20056 | 0.190931 | 0.329191 | 1 |
| FAELT_B_C  | 46  | -0.29713 | -1.20012 | 0.179028 | 0.328913 | 1 |
| REACTOME   | 37  | -0.30978 | -1.19977 | 0.17866  | 0.32854  | 1 |
| GINESTIER_ | 305 | -0.21845 | -1.19748 | 0.082759 | 0.331471 | 1 |
| FERRANDO   | 75  | -0.26719 | -1.19153 | 0.141388 | 0.341182 | 1 |
| CHIANG_LI' | 134 | -0.24062 | -1.18896 | 0.118156 | 0.344816 | 1 |
| ODONNELL   | 21  | -0.35871 | -1.18861 | 0.231678 | 0.344431 | 1 |
| REACTOME   | 60  | -0.27588 | -1.18819 | 0.153061 | 0.34413  | 1 |
| BARIS_THY  | 19  | -0.36318 | -1.18455 | 0.257353 | 0.349909 | 1 |
| RIZ_ERYTHI | 71  | -0.26905 | -1.18176 | 0.171662 | 0.353988 | 1 |
| REACTOME   | 41  | -0.29713 | -1.16854 | 0.195122 | 0.37852  | 1 |
| KIM_GASTI  | 94  | -0.24913 | -1.16669 | 0.148571 | 0.381031 | 1 |
| SHEPARD_(  | 143 | -0.23376 | -1.16541 | 0.14377  | 0.382378 | 1 |
| IVANOVA_I  | 31  | -0.31039 | -1.16246 | 0.223919 | 0.38707  | 1 |
| FURUKAW/   | 65  | -0.27286 | -1.16187 | 0.176781 | 0.387026 | 1 |
| NAKAMUR,   | 45  | -0.29544 | -1.15605 | 0.211401 | 0.39797  | 1 |
| BERENJENC  | 478 | -0.20044 | -1.15248 | 0.052885 | 0.404189 | 1 |
| BIOCARTA_  | 16  | -0.37797 | -1.14823 | 0.268409 | 0.412103 | 1 |
| HOSHIDA_I  | 111 | -0.24154 | -1.14744 | 0.165165 | 0.412506 | 1 |
| WILLIAMS_  | 17  | -0.37409 | -1.14741 | 0.28246  | 0.411322 | 1 |
| PUIFFE_IN\ | 77  | -0.25601 | -1.14669 | 0.188571 | 0.41172  | 1 |
| SHEPARD_I  | 156 | -0.22834 | -1.14607 | 0.173913 | 0.411861 | 1 |
| REACTOME   | 28  | -0.31802 | -1.14474 | 0.254279 | 0.413647 | 1 |
| REACTOME   | 16  | -0.37979 | -1.1443  | 0.268065 | 0.413342 | 1 |
| LIU_CDX2_  | 35  | -0.30077 | -1.13822 | 0.225    | 0.425032 | 1 |
| WANG_CIS   | 131 | -0.23001 | -1.13577 | 0.159292 | 0.429092 | 1 |

|            |     |          |          |          |          |   |
|------------|-----|----------|----------|----------|----------|---|
| KEGG_PRO   | 82  | -0.24888 | -1.13438 | 0.185864 | 0.430837 | 1 |
| REACTOME   | 21  | -0.33884 | -1.13306 | 0.275862 | 0.432443 | 1 |
| CAIRO_HEF  | 197 | -0.21558 | -1.13214 | 0.16443  | 0.433159 | 1 |
| KEGG_BASI  | 33  | -0.30082 | -1.13083 | 0.243316 | 0.434787 | 1 |
| REACTOME   | 36  | -0.29608 | -1.12917 | 0.271318 | 0.437317 | 1 |
| SEIDEN_MI  | 17  | -0.35163 | -1.12909 | 0.264563 | 0.436233 | 1 |
| JAZAG_TGF  | 34  | -0.30459 | -1.12877 | 0.297872 | 0.435655 | 1 |
| MOREAUX_   | 43  | -0.28348 | -1.12691 | 0.235142 | 0.43856  | 1 |
| REACTOME   | 30  | -0.3095  | -1.12626 | 0.3      | 0.438883 | 1 |
| CHOW_RA    | 27  | -0.31302 | -1.12061 | 0.296758 | 0.450436 | 1 |
| REACTOME   | 33  | -0.30234 | -1.11481 | 0.272727 | 0.46231  | 1 |
| FLOTHO_PI  | 28  | -0.30954 | -1.11398 | 0.248244 | 0.463013 | 1 |
| HU_ANGIO   | 29  | -0.31011 | -1.11171 | 0.275325 | 0.466997 | 1 |
| MEINHOLD   | 18  | -0.35592 | -1.11145 | 0.315534 | 0.466304 | 1 |
| BROWNE_I   | 96  | -0.24166 | -1.11084 | 0.254491 | 0.466428 | 1 |
| YAO_TEMP   | 163 | -0.21755 | -1.1066  | 0.197531 | 0.47504  | 1 |
| WONG_IFN   | 17  | -0.35505 | -1.10455 | 0.313726 | 0.478558 | 1 |
| REACTOME   | 56  | -0.26402 | -1.10357 | 0.269841 | 0.479665 | 1 |
| SCHLOSSER  | 155 | -0.21764 | -1.10224 | 0.213376 | 0.481506 | 1 |
| JEON_SMA   | 18  | -0.34379 | -1.10081 | 0.324074 | 0.483678 | 1 |
| SMITH_LIV  | 31  | -0.29749 | -1.10047 | 0.293532 | 0.483152 | 1 |
| KEGG_PRO   | 23  | -0.32305 | -1.09939 | 0.291469 | 0.484417 | 1 |
| KAYO_AGIN  | 104 | -0.2281  | -1.09839 | 0.26257  | 0.485335 | 1 |
| LIN_MELAN  | 39  | -0.28107 | -1.09481 | 0.285347 | 0.492702 | 1 |
| REACTOME   | 358 | -0.19401 | -1.09348 | 0.148551 | 0.494591 | 1 |
| JAZAERI_BF | 45  | -0.27346 | -1.09343 | 0.314861 | 0.493349 | 1 |
| DAIRKEE_T  | 320 | -0.19383 | -1.08897 | 0.201754 | 0.503012 | 1 |
| KRASNOSEI  | 37  | -0.28346 | -1.08881 | 0.30597  | 0.502057 | 1 |
| PENG_RAP   | 37  | -0.28418 | -1.08792 | 0.321526 | 0.502899 | 1 |
| PUJANA_BI  | 100 | -0.22931 | -1.08788 | 0.259155 | 0.501641 | 1 |
| MELLMAN_   | 45  | -0.27147 | -1.08699 | 0.305211 | 0.502452 | 1 |
| NIKOLSKY_  | 17  | -0.34334 | -1.08571 | 0.339367 | 0.504178 | 1 |
| ZHANG_RE   | 98  | -0.22878 | -1.08546 | 0.260355 | 0.503504 | 1 |
| BIOCARTA_  | 23  | -0.31047 | -1.08345 | 0.320093 | 0.507145 | 1 |

|            |     |          |          |          |          |   |
|------------|-----|----------|----------|----------|----------|---|
| VANTVEER_  | 42  | -0.27112 | -1.08308 | 0.323457 | 0.506645 | 1 |
| MOREIRA_   | 24  | -0.31213 | -1.07783 | 0.339713 | 0.518507 | 1 |
| SIG_INSULI | 49  | -0.26693 | -1.07576 | 0.306329 | 0.522247 | 1 |
| REACTOME   | 24  | -0.3136  | -1.07386 | 0.363218 | 0.525789 | 1 |
| RICKMAN_   | 217 | -0.20207 | -1.07293 | 0.260417 | 0.526671 | 1 |
| DACOSTA_   | 23  | -0.32449 | -1.07165 | 0.366589 | 0.528671 | 1 |
| MARKEY_R   | 108 | -0.22028 | -1.06973 | 0.283747 | 0.532231 | 1 |
| CREIGHTON  | 416 | -0.18589 | -1.06855 | 0.2      | 0.533793 | 1 |
| KUUSELO_I  | 23  | -0.3136  | -1.0663  | 0.36211  | 0.538231 | 1 |
| REACTOME   | 77  | -0.2376  | -1.06549 | 0.309659 | 0.538926 | 1 |
| LU_AGING_  | 145 | -0.20999 | -1.0652  | 0.292398 | 0.538238 | 1 |
| SCHLOSSER  | 102 | -0.22361 | -1.06489 | 0.328652 | 0.537626 | 1 |
| ALCALAY_A  | 178 | -0.20653 | -1.06437 | 0.2589   | 0.537656 | 1 |
| BROWNE_I   | 220 | -0.20068 | -1.06424 | 0.263844 | 0.536647 | 1 |
| KAYO_AGIN  | 189 | -0.20431 | -1.06143 | 0.282828 | 0.542716 | 1 |
| NUTT_GBN   | 43  | -0.26692 | -1.06077 | 0.369898 | 0.542987 | 1 |
| APPIERTO_  | 38  | -0.27281 | -1.06016 | 0.353808 | 0.54319  | 1 |
| KEGG_ONE   | 16  | -0.34103 | -1.05692 | 0.36689  | 0.550231 | 1 |
| KEGG_PUR   | 152 | -0.2078  | -1.04893 | 0.33119  | 0.570025 | 1 |
| MODY_HIP   | 27  | -0.29585 | -1.0489  | 0.383495 | 0.568688 | 1 |
| KEGG_HIST  | 29  | -0.29502 | -1.0483  | 0.350711 | 0.568922 | 1 |
| LIU_SOX4_  | 296 | -0.19164 | -1.04824 | 0.304196 | 0.567644 | 1 |
| AMUNDSO    | 85  | -0.22992 | -1.04791 | 0.355844 | 0.567073 | 1 |
| SMID_BRE/  | 159 | -0.20728 | -1.04749 | 0.340836 | 0.566748 | 1 |
| BIOCARTA_  | 33  | -0.27866 | -1.04431 | 0.365482 | 0.574123 | 1 |
| SHEDDEN_   | 61  | -0.23865 | -1.04281 | 0.34903  | 0.576825 | 1 |
| NIKOLSKY_  | 21  | -0.32102 | -1.04239 | 0.400463 | 0.576526 | 1 |
| REACTOME   | 128 | -0.21463 | -1.0409  | 0.371191 | 0.579012 | 1 |
| PENG_LEU/  | 50  | -0.24988 | -1.0406  | 0.382813 | 0.578366 | 1 |
| WAKASUGI   | 55  | -0.24594 | -1.04021 | 0.36911  | 0.577887 | 1 |
| GAZDA_DI/  | 36  | -0.26625 | -1.03925 | 0.405128 | 0.579145 | 1 |
| YAO_TEMP   | 92  | -0.22461 | -1.03851 | 0.357542 | 0.579671 | 1 |
| BOYLAN_M   | 26  | -0.29455 | -1.02942 | 0.397059 | 0.603121 | 1 |
| BOYALT_I   | 26  | -0.29428 | -1.02872 | 0.395181 | 0.603561 | 1 |

|           |     |          |          |          |          |   |
|-----------|-----|----------|----------|----------|----------|---|
| KEGG_NUC  | 44  | -0.25674 | -1.02869 | 0.424691 | 0.602177 | 1 |
| BIOCARTA_ | 21  | -0.31368 | -1.02547 | 0.397229 | 0.609569 | 1 |
| DACOSTA_  | 297 | -0.18523 | -1.02499 | 0.369004 | 0.609409 | 1 |
| YOSHIOKA_ | 32  | -0.27561 | -1.02471 | 0.4      | 0.608684 | 1 |
| GRAHAM_   | 83  | -0.22459 | -1.02396 | 0.4      | 0.609228 | 1 |
| KEGG_PRO  | 23  | -0.30506 | -1.02076 | 0.426914 | 0.616654 | 1 |
| DANG_MY   | 124 | -0.20837 | -1.02072 | 0.412104 | 0.615282 | 1 |
| KEGG_PYRI | 92  | -0.22085 | -1.01942 | 0.419718 | 0.617538 | 1 |
| MATTIOLI_ | 15  | -0.33315 | -1.01904 | 0.435185 | 0.617129 | 1 |
| REACTOME  | 15  | -0.336   | -1.01803 | 0.418605 | 0.618408 | 1 |
| TONG_INTI | 55  | -0.2417  | -1.01525 | 0.407407 | 0.624456 | 1 |
| AGUIRRE_F | 287 | -0.18674 | -1.01511 | 0.374046 | 0.623373 | 1 |
| BIOCARTA_ | 27  | -0.28282 | -1.01225 | 0.415385 | 0.629753 | 1 |
| BIOCARTA_ | 32  | -0.27576 | -1.01181 | 0.437666 | 0.629494 | 1 |
| HASLINGER | 16  | -0.33063 | -1.01106 | 0.445652 | 0.630062 | 1 |
| LIU_PROST | 90  | -0.21747 | -1.00988 | 0.429348 | 0.631813 | 1 |
| SCHUHMA   | 67  | -0.23023 | -1.0087  | 0.4375   | 0.633431 | 1 |
| BOYALT_I  | 45  | -0.25369 | -1.00865 | 0.443099 | 0.63212  | 1 |
| LIANG_HEN | 36  | -0.26276 | -1.00821 | 0.417303 | 0.631855 | 1 |
| MAYBURD_  | 50  | -0.24354 | -1.00781 | 0.462366 | 0.631507 | 1 |
| KEGG_HON  | 28  | -0.28789 | -1.00758 | 0.448687 | 0.630658 | 1 |
| REACTOME  | 32  | -0.27285 | -1.00635 | 0.436364 | 0.632651 | 1 |
| SAKAI_TUN | 79  | -0.22014 | -1.00589 | 0.452247 | 0.632404 | 1 |
| REACTOME  | 29  | -0.27636 | -1.00543 | 0.418719 | 0.632269 | 1 |
| KEGG_ARG  | 53  | -0.24518 | -1.00518 | 0.420103 | 0.63159  | 1 |
| JAERVINEN | 39  | -0.25918 | -1.00514 | 0.449383 | 0.630245 | 1 |
| JIANG_VHL | 91  | -0.21639 | -1.00505 | 0.439353 | 0.62904  | 1 |
| HOFFMANI  | 38  | -0.26461 | -1.0049  | 0.421717 | 0.628039 | 1 |
| TSENG_IRS | 99  | -0.21079 | -1.00448 | 0.439528 | 0.62766  | 1 |
| DOUGLAS_  | 500 | -0.17373 | -1.00309 | 0.426009 | 0.630017 | 1 |
| MARTORIA  | 76  | -0.2175  | -1.00284 | 0.447917 | 0.629337 | 1 |
| KEGG_TAS  | 50  | -0.2446  | -1.00068 | 0.443099 | 0.633966 | 1 |
| KEGG_VALI | 43  | -0.25316 | -0.99918 | 0.427184 | 0.636684 | 1 |
| SA_CASPAS | 15  | -0.33387 | -0.99849 | 0.454545 | 0.637159 | 1 |

|            |     |          |          |          |          |   |
|------------|-----|----------|----------|----------|----------|---|
| KEGG_SYST  | 117 | -0.20819 | -0.99737 | 0.457317 | 0.638757 | 1 |
| MOREAUX_   | 124 | -0.19944 | -0.99648 | 0.48     | 0.639657 | 1 |
| MODY_HIP   | 22  | -0.29086 | -0.99216 | 0.468031 | 0.650136 | 1 |
| SHEN_SMA   | 406 | -0.17548 | -0.99121 | 0.471963 | 0.651283 | 1 |
| STARK_HYF  | 41  | -0.25572 | -0.99018 | 0.460274 | 0.65267  | 1 |
| KEGG_INO   | 54  | -0.23426 | -0.98645 | 0.493188 | 0.661685 | 1 |
| BASSO_B_I  | 133 | -0.19952 | -0.98488 | 0.504532 | 0.664579 | 1 |
| GENTILE_U  | 29  | -0.27423 | -0.98429 | 0.453725 | 0.664791 | 1 |
| CHAUHAN_   | 47  | -0.24482 | -0.98409 | 0.482927 | 0.6639   | 1 |
| GRADE_CO   | 28  | -0.27375 | -0.98146 | 0.470588 | 0.669684 | 1 |
| PYEON_CA   | 171 | -0.19042 | -0.98051 | 0.485714 | 0.670813 | 1 |
| TCGA_GLIC  | 29  | -0.26996 | -0.98009 | 0.471744 | 0.670392 | 1 |
| KAAB_FAIL  | 40  | -0.24954 | -0.97879 | 0.48062  | 0.672537 | 1 |
| KIM_MYC_   | 155 | -0.19434 | -0.97482 | 0.523511 | 0.682087 | 1 |
| WANG_RES   | 28  | -0.27061 | -0.97071 | 0.5      | 0.692038 | 1 |
| XU_HGF_T   | 17  | -0.30937 | -0.96829 | 0.5      | 0.697423 | 1 |
| REACTOME   | 42  | -0.24383 | -0.96823 | 0.534527 | 0.696069 | 1 |
| CHEOK_RE   | 17  | -0.31718 | -0.96774 | 0.521028 | 0.695943 | 1 |
| MARTORIA   | 252 | -0.17733 | -0.96345 | 0.57483  | 0.706428 | 1 |
| GOUYER_T   | 17  | -0.30541 | -0.96302 | 0.538265 | 0.70616  | 1 |
| RICKMAN_   | 91  | -0.2094  | -0.9621  | 0.571831 | 0.707266 | 1 |
| BANDRES_I  | 132 | -0.19409 | -0.95939 | 0.550315 | 0.713254 | 1 |
| PRAMOON    | 49  | -0.23444 | -0.9559  | 0.538462 | 0.721248 | 1 |
| BIOCARTA_  | 21  | -0.29595 | -0.95465 | 0.532637 | 0.723259 | 1 |
| SESTO_RES  | 19  | -0.29699 | -0.95087 | 0.532067 | 0.731972 | 1 |
| YAO_TEMP   | 30  | -0.25974 | -0.95036 | 0.544776 | 0.731857 | 1 |
| JIANG_HYP  | 21  | -0.28867 | -0.95007 | 0.543062 | 0.73109  | 1 |
| KEGG_FAT   | 41  | -0.2455  | -0.94923 | 0.553616 | 0.731951 | 1 |
| PELLICCIOT | 62  | -0.2187  | -0.94869 | 0.508108 | 0.73187  | 1 |
| PROVENZA   | 186 | -0.18281 | -0.94535 | 0.638037 | 0.73967  | 1 |
| BIOCARTA_  | 18  | -0.29893 | -0.94034 | 0.521531 | 0.751735 | 1 |
| ACEVEDO_   | 110 | -0.19626 | -0.94026 | 0.625    | 0.750362 | 1 |
| VERNELL_R  | 39  | -0.24262 | -0.93713 | 0.562176 | 0.75738  | 1 |
| ROME_INS   | 92  | -0.20135 | -0.93703 | 0.598901 | 0.756103 | 1 |

|            |     |          |          |          |          |   |
|------------|-----|----------|----------|----------|----------|---|
| CHEOK_REI  | 19  | -0.29726 | -0.9356  | 0.523227 | 0.758286 | 1 |
| KEGG_REG   | 32  | -0.2546  | -0.93512 | 0.554124 | 0.757993 | 1 |
| REACTOME   | 19  | -0.29292 | -0.93403 | 0.561611 | 0.759417 | 1 |
| CROMER_M   | 48  | -0.2285  | -0.93217 | 0.594724 | 0.762854 | 1 |
| BIOCARTA_  | 21  | -0.28022 | -0.93055 | 0.587156 | 0.765602 | 1 |
| CHENG_IM   | 105 | -0.19353 | -0.92995 | 0.593583 | 0.765634 | 1 |
| SHARMA_F   | 24  | -0.27509 | -0.92888 | 0.592342 | 0.76686  | 1 |
| REACTOME   | 59  | -0.22103 | -0.92801 | 0.61244  | 0.767632 | 1 |
| SABATES_C  | 20  | -0.2827  | -0.92513 | 0.556098 | 0.77367  | 1 |
| GRADE_ME   | 43  | -0.23279 | -0.92451 | 0.580808 | 0.773796 | 1 |
| MARTINEZ_  | 213 | -0.17625 | -0.92127 | 0.690972 | 0.781158 | 1 |
| XU_GH1_EI  | 46  | -0.2246  | -0.92071 | 0.59204  | 0.781077 | 1 |
| BIOCARTA_  | 27  | -0.25524 | -0.91889 | 0.585366 | 0.784341 | 1 |
| REACTOME   | 34  | -0.24481 | -0.9183  | 0.573265 | 0.784315 | 1 |
| TAKAO_REI  | 88  | -0.19876 | -0.9182  | 0.642276 | 0.782976 | 1 |
| BROWNE_I   | 241 | -0.17081 | -0.91343 | 0.754153 | 0.794052 | 1 |
| VALK_AML   | 26  | -0.26026 | -0.91104 | 0.580723 | 0.798889 | 1 |
| BIOCARTA_  | 28  | -0.25269 | -0.91069 | 0.62093  | 0.798183 | 1 |
| UEDA_CEN   | 83  | -0.19514 | -0.90873 | 0.67027  | 0.801738 | 1 |
| LIN_NPAS4  | 126 | -0.18642 | -0.90655 | 0.710526 | 0.805758 | 1 |
| DAIRKEE_C  | 110 | -0.19005 | -0.90623 | 0.684211 | 0.804883 | 1 |
| ZHAN_MUI   | 28  | -0.25149 | -0.90368 | 0.585678 | 0.80979  | 1 |
| BANDRES_I  | 17  | -0.29277 | -0.90298 | 0.574468 | 0.809947 | 1 |
| GOLUB_ALI  | 19  | -0.28224 | -0.90259 | 0.624402 | 0.809351 | 1 |
| REACTOME   | 34  | -0.24066 | -0.9005  | 0.620525 | 0.812969 | 1 |
| REACTOME   | 26  | -0.25276 | -0.89921 | 0.643564 | 0.814668 | 1 |
| REACTOME   | 68  | -0.20559 | -0.89811 | 0.650754 | 0.815767 | 1 |
| KEGG_ALAI  | 31  | -0.24509 | -0.89768 | 0.623288 | 0.815171 | 1 |
| KEGG_LYSII | 44  | -0.22206 | -0.89483 | 0.65     | 0.820581 | 1 |
| KEGG_GLYC  | 16  | -0.28861 | -0.89481 | 0.610723 | 0.818989 | 1 |
| ST_PHOSPH  | 33  | -0.23901 | -0.89453 | 0.650386 | 0.818037 | 1 |
| SMID_BREI  | 17  | -0.28739 | -0.89427 | 0.590047 | 0.817099 | 1 |
| WEST_ADR   | 20  | -0.27024 | -0.89327 | 0.621749 | 0.817995 | 1 |
| BIOCARTA_  | 21  | -0.26955 | -0.88581 | 0.6075   | 0.834805 | 1 |

|            |     |          |          |          |          |   |
|------------|-----|----------|----------|----------|----------|---|
| SCHLOSSER  | 46  | -0.21844 | -0.88506 | 0.662404 | 0.834972 | 1 |
| TANAKA_M   | 98  | -0.18614 | -0.88471 | 0.724638 | 0.834204 | 1 |
| HASLINGER  | 15  | -0.29243 | -0.88285 | 0.637387 | 0.837081 | 1 |
| ASGHARZA   | 34  | -0.23157 | -0.87976 | 0.673171 | 0.842713 | 1 |
| PODAR_RE   | 18  | -0.27893 | -0.87641 | 0.652381 | 0.849027 | 1 |
| BIOCARTA_  | 22  | -0.26082 | -0.87596 | 0.668269 | 0.848467 | 1 |
| LASTOWSK   | 38  | -0.22444 | -0.87537 | 0.666667 | 0.848205 | 1 |
| BONOME_I   | 20  | -0.26702 | -0.87435 | 0.626126 | 0.84891  | 1 |
| REACTOME   | 20  | -0.27267 | -0.8738  | 0.640898 | 0.848562 | 1 |
| GAZDA_DI/  | 28  | -0.24341 | -0.87054 | 0.661578 | 0.854383 | 1 |
| MCCABE_H   | 21  | -0.26466 | -0.86813 | 0.664336 | 0.858165 | 1 |
| BIOCARTA_  | 27  | -0.24706 | -0.86613 | 0.68     | 0.861074 | 1 |
| RIGGINS_T, | 64  | -0.19875 | -0.86593 | 0.759669 | 0.859864 | 1 |
| LIANG_HEN  | 42  | -0.22246 | -0.86496 | 0.720627 | 0.860367 | 1 |
| KEGG_RIBC  | 16  | -0.28643 | -0.86269 | 0.661215 | 0.863768 | 1 |
| BIOCARTA_  | 51  | -0.2084  | -0.86126 | 0.735294 | 0.865302 | 1 |
| AGUIRRE_F  | 220 | -0.16132 | -0.86112 | 0.855306 | 0.863961 | 1 |
| BACOLOD_   | 42  | -0.21778 | -0.85975 | 0.716495 | 0.865322 | 1 |
| REACTOME   | 21  | -0.25528 | -0.85872 | 0.670886 | 0.865846 | 1 |
| KEGG_BUT,  | 34  | -0.22473 | -0.85865 | 0.67801  | 0.864347 | 1 |
| KEGG_BAS,  | 34  | -0.23271 | -0.85814 | 0.704388 | 0.863836 | 1 |
| FERRANDO   | 15  | -0.27972 | -0.85708 | 0.661098 | 0.864382 | 1 |
| GAJATE_RE  | 16  | -0.28138 | -0.85468 | 0.637387 | 0.867748 | 1 |
| HUANG_D/   | 57  | -0.20117 | -0.85439 | 0.76455  | 0.866757 | 1 |
| HONMA_D    | 31  | -0.23166 | -0.85336 | 0.687961 | 0.867295 | 1 |
| CHESLER_B  | 62  | -0.1967  | -0.84463 | 0.761039 | 0.883631 | 1 |
| SYED_ESTR  | 18  | -0.26471 | -0.84315 | 0.683951 | 0.884988 | 1 |
| KEGG_GLYC  | 25  | -0.24424 | -0.84184 | 0.706311 | 0.886053 | 1 |
| WEBER_MI   | 15  | -0.28312 | -0.8404  | 0.666667 | 0.887226 | 1 |
| BIOCARTA_  | 42  | -0.21248 | -0.83743 | 0.759494 | 0.891315 | 1 |
| MOOTHA_I   | 19  | -0.25497 | -0.83742 | 0.709091 | 0.889681 | 1 |
| BEIER_GLIC | 36  | -0.21834 | -0.83706 | 0.738499 | 0.888718 | 1 |
| HOSHIDA_I  | 65  | -0.18929 | -0.8344  | 0.803371 | 0.892287 | 1 |
| SMID_BRE/  | 37  | -0.21771 | -0.83302 | 0.744472 | 0.893222 | 1 |



|            |     |          |          |          |          |   |
|------------|-----|----------|----------|----------|----------|---|
| BERNARD_   | 35  | -0.21471 | -0.8287  | 0.74813  | 0.8998   | 1 |
| LIU_COMM   | 41  | -0.2068  | -0.82389 | 0.752551 | 0.907037 | 1 |
| SPIRA_SMC  | 19  | -0.25527 | -0.8236  | 0.716346 | 0.90587  | 1 |
| REN_ALVEC  | 95  | -0.17663 | -0.82336 | 0.867435 | 0.904633 | 1 |
| BIOCARTA_  | 28  | -0.22563 | -0.82189 | 0.763547 | 0.905763 | 1 |
| REACTOME   | 29  | -0.22774 | -0.82004 | 0.760599 | 0.907365 | 1 |
| LIN_APC_T. | 50  | -0.19637 | -0.81452 | 0.820896 | 0.915412 | 1 |
| DING_LUN   | 92  | -0.17195 | -0.80974 | 0.871795 | 0.922    | 1 |
| REACTOME   | 25  | -0.22414 | -0.80779 | 0.77327  | 0.923693 | 1 |
| GENTILE_R  | 44  | -0.19862 | -0.8077  | 0.813843 | 0.922152 | 1 |
| BIOCARTA_  | 15  | -0.26798 | -0.80625 | 0.73523  | 0.922982 | 1 |
| NOUZOVA_   | 131 | -0.16204 | -0.80443 | 0.91716  | 0.924302 | 1 |
| BIOCARTA_  | 25  | -0.23271 | -0.80063 | 0.775    | 0.928815 | 1 |
| REACTOME   | 16  | -0.26197 | -0.79587 | 0.758389 | 0.934598 | 1 |
| BIOCARTA_  | 26  | -0.23028 | -0.79431 | 0.785894 | 0.935479 | 1 |
| REACTOME   | 24  | -0.22723 | -0.79056 | 0.761488 | 0.939479 | 1 |
| REACTOME   | 26  | -0.22181 | -0.78419 | 0.776961 | 0.946936 | 1 |
| GALLUZZI_I | 38  | -0.20184 | -0.78411 | 0.838542 | 0.945353 | 1 |
| FRASOR_RI  | 20  | -0.23915 | -0.78309 | 0.772622 | 0.945162 | 1 |
| LUCAS_HNI  | 50  | -0.19174 | -0.77754 | 0.859903 | 0.951262 | 1 |
| RIZ_ERYTHI | 38  | -0.20262 | -0.7759  | 0.838095 | 0.951717 | 1 |
| BIOCARTA_  | 34  | -0.20614 | -0.77376 | 0.84901  | 0.952932 | 1 |
| BIOCARTA_  | 27  | -0.22081 | -0.76979 | 0.824607 | 0.956673 | 1 |
| ZHAN_EAR   | 37  | -0.20016 | -0.76965 | 0.85122  | 0.955162 | 1 |
| BROWNE_I   | 149 | -0.15227 | -0.7609  | 0.975936 | 0.964559 | 1 |
| YAO_TEMP   | 63  | -0.17783 | -0.76063 | 0.898907 | 0.963227 | 1 |
| BIOCARTA_  | 19  | -0.23625 | -0.75748 | 0.781182 | 0.965276 | 1 |
| REACTOME   | 28  | -0.21269 | -0.75352 | 0.856796 | 0.968277 | 1 |
| REACTOME   | 82  | -0.16467 | -0.74926 | 0.941177 | 0.971423 | 1 |
| REACTOME   | 28  | -0.20616 | -0.74662 | 0.873737 | 0.972728 | 1 |
| LAIHO_COL  | 77  | -0.16514 | -0.74634 | 0.938503 | 0.971314 | 1 |
| LI_WILMS_  | 26  | -0.20933 | -0.74124 | 0.853904 | 0.975006 | 1 |
| REACTOME   | 17  | -0.23472 | -0.74001 | 0.835648 | 0.974592 | 1 |
| CAIRO_HEF  | 16  | -0.24295 | -0.73823 | 0.831754 | 0.974785 | 1 |

|            |    |          |          |          |          |   |
|------------|----|----------|----------|----------|----------|---|
| SCHLESING  | 22 | -0.22304 | -0.73696 | 0.862981 | 0.974453 | 1 |
| BIOCARTA_  | 19 | -0.22816 | -0.72798 | 0.845209 | 0.981482 | 1 |
| REACTOME   | 18 | -0.22936 | -0.72563 | 0.84949  | 0.981931 | 1 |
| CAFFAREL_  | 25 | -0.20734 | -0.72557 | 0.881549 | 0.980282 | 1 |
| FAELT_B_C  | 43 | -0.18311 | -0.72413 | 0.916667 | 0.979952 | 1 |
| HANN_RES   | 45 | -0.18461 | -0.72057 | 0.908163 | 0.981477 | 1 |
| REACTOME   | 16 | -0.23624 | -0.71615 | 0.859189 | 0.983611 | 1 |
| CHANG_IM   | 15 | -0.23518 | -0.7144  | 0.85814  | 0.983431 | 1 |
| BIOCARTA_  | 16 | -0.23368 | -0.70756 | 0.876623 | 0.987361 | 1 |
| REACTOME   | 33 | -0.18762 | -0.70231 | 0.944724 | 0.98983  | 1 |
| KEGG_BET/  | 22 | -0.20504 | -0.70108 | 0.899244 | 0.989023 | 1 |
| REACTOME   | 23 | -0.20139 | -0.70067 | 0.877359 | 0.987647 | 1 |
| LEE_LIVER_ | 68 | -0.15955 | -0.69717 | 0.954667 | 0.988651 | 1 |
| LIANG_HEN  | 32 | -0.18867 | -0.69546 | 0.9275   | 0.988198 | 1 |
| ZHONG_RE   | 67 | -0.15641 | -0.68837 | 0.98645  | 0.991458 | 1 |
| OZEN_MIR   | 15 | -0.22809 | -0.68728 | 0.898455 | 0.990489 | 1 |
| REACTOME   | 31 | -0.18932 | -0.68052 | 0.916067 | 0.993309 | 1 |
| PIEPOLI_LG | 15 | -0.22695 | -0.67798 | 0.877193 | 0.993168 | 1 |
| REACTOME   | 15 | -0.22516 | -0.6779  | 0.892135 | 0.991556 | 1 |
| KAAB_FAIL  | 36 | -0.18184 | -0.67563 | 0.943878 | 0.991242 | 1 |
| REACTOME   | 47 | -0.16755 | -0.67332 | 0.97     | 0.99087  | 1 |
| HOEBEKE_I  | 87 | -0.15008 | -0.67312 | 0.994505 | 0.989339 | 1 |
| REACTOME   | 26 | -0.19181 | -0.67134 | 0.916667 | 0.988734 | 1 |
| KEGG_FRU   | 33 | -0.17707 | -0.67119 | 0.929782 | 0.98717  | 1 |
| REACTOME   | 39 | -0.17166 | -0.66953 | 0.960396 | 0.986479 | 1 |
| REACTOME   | 27 | -0.18832 | -0.66806 | 0.938967 | 0.985634 | 1 |
| MOOTHA_I   | 21 | -0.20145 | -0.65852 | 0.924574 | 0.989001 | 1 |
| REACTOME   | 30 | -0.18475 | -0.6566  | 0.96401  | 0.988332 | 1 |
| KAYO_CALC  | 65 | -0.1498  | -0.64832 | 0.992611 | 0.990542 | 1 |
| VANTVEER_  | 38 | -0.16438 | -0.63133 | 0.970223 | 0.995842 | 1 |
| TOMIDA_M   | 19 | -0.1933  | -0.62626 | 0.942094 | 0.996048 | 1 |
| BIOCARTA_  | 27 | -0.17667 | -0.62464 | 0.956204 | 0.994996 | 1 |
| BANDRES_I  | 25 | -0.17806 | -0.61664 | 0.967901 | 0.996056 | 1 |
| GAUSSMAN   | 29 | -0.17063 | -0.61381 | 0.975186 | 0.995318 | 1 |

|           |    |          |          |          |          |   |
|-----------|----|----------|----------|----------|----------|---|
| BIOCARTA_ | 17 | -0.19563 | -0.59901 | 0.948478 | 0.997857 | 1 |
| KEGG_PHO  | 76 | -0.13483 | -0.59624 | 0.997348 | 0.996946 | 1 |
| REACTOME  | 21 | -0.17508 | -0.58869 | 0.97561  | 0.997176 | 1 |
| YANG_BRE  | 28 | -0.15836 | -0.57127 | 0.989822 | 0.999065 | 1 |
| REACTOME  | 25 | -0.16504 | -0.56502 | 0.98533  | 0.998527 | 1 |
| GARGALOV  | 24 | -0.16474 | -0.56388 | 0.98801  | 0.997077 | 1 |
| REACTOME  | 28 | -0.15144 | -0.54741 | 0.981221 | 0.997959 | 1 |
| REACTOME  | 16 | -0.16931 | -0.52987 | 0.995283 | 0.998368 | 1 |
| BIOCARTA_ | 18 | -0.14879 | -0.47119 | 0.992991 | 1        | 1 |
| REACTOME  | 17 | -0.13424 | -0.42023 | 1        | 0.999733 | 1 |
