# Supplementary material
Source: PubMed Central journal article supplement (PMC3905243)
Supplement: NIHMS534085-supplement-8.pdf [file NIHMS534085-supplement-8.pdf]

| NAME       | SIZE | ES       | NES      | NOM p-val | FDR q-val | FWER p-val |
|------------|------|----------|----------|-----------|-----------|------------|
| CHARAFE_I  | 431  | 0.539515 | 2.843872 | 0         | 0         | 0          |
| WU_CELL_I  | 180  | 0.591739 | 2.834126 | 0         | 0         | 0          |
| ONDER_CD   | 455  | 0.506793 | 2.677947 | 0         | 0         | 0          |
| ZHANG_RE   | 207  | 0.542992 | 2.656739 | 0         | 0         | 0          |
| REN_ALVEC  | 400  | 0.497504 | 2.601917 | 0         | 0         | 0          |
| MISSIAGLIA | 97   | 0.591785 | 2.590789 | 0         | 0         | 0          |
| LIN_SILENC | 101  | 0.586855 | 2.588637 | 0         | 0         | 0          |
| SANA_TNF_I | 75   | 0.617773 | 2.581962 | 0         | 0         | 0          |
| TAKEDA_T/  | 167  | 0.538111 | 2.57526  | 0         | 0         | 0          |
| BROWNE_I   | 67   | 0.618092 | 2.545484 | 0         | 0         | 0          |
| BILD_HRAS  | 244  | 0.512776 | 2.536006 | 0         | 0         | 0          |
| GRAHAM_C   | 90   | 0.569964 | 2.496806 | 0         | 0         | 0          |
| HUANG_D/   | 74   | 0.600444 | 2.471039 | 0         | 0         | 0          |
| KOBAYASH   | 96   | 0.569797 | 2.467323 | 0         | 0         | 0          |
| MOSERLE_I  | 29   | 0.723569 | 2.463894 | 0         | 0         | 0          |
| GUENTHER   | 25   | 0.746949 | 2.457667 | 0         | 0         | 0          |
| NOJIMA_SF  | 24   | 0.741336 | 2.446814 | 0         | 0         | 0          |
| SANA_RESF  | 64   | 0.598933 | 2.437727 | 0         | 0         | 0          |
| NAGASHIM   | 172  | 0.514007 | 2.43458  | 0         | 0         | 0          |
| XU_HGF_SI  | 24   | 0.736744 | 2.432169 | 0         | 0         | 0          |
| AMIT_SERU  | 56   | 0.62064  | 2.417766 | 0         | 0         | 0          |
| LI_WILMS_I | 177  | 0.506134 | 2.414015 | 0         | 0         | 0          |
| ELVIDGE_H  | 164  | 0.517474 | 2.41294  | 0         | 0         | 0          |
| RASHI_RES  | 118  | 0.53874  | 2.409351 | 0         | 0         | 0          |
| SEITZ_NEO  | 72   | 0.57692  | 2.397869 | 0         | 0         | 0          |
| LIANG_SILE | 33   | 0.67905  | 2.395818 | 0         | 0         | 0          |
| BRUECKNEI  | 76   | 0.568301 | 2.394786 | 0         | 0         | 0          |
| HINATA_NI  | 70   | 0.578664 | 2.38143  | 0         | 0         | 0          |
| ELVIDGE_H  | 125  | 0.530131 | 2.375566 | 0         | 0         | 0          |
| WEINMANI   | 34   | 0.663224 | 2.364121 | 0         | 0         | 0          |
| TURASHVIL  | 184  | 0.49217  | 2.363517 | 0         | 0         | 0          |
| ONDER_CD   | 80   | 0.563088 | 2.341849 | 0         | 0         | 0          |
| COLDREN_I  | 216  | 0.474647 | 2.325055 | 0         | 0         | 0          |

|            |     |          |          |   |          |       |
|------------|-----|----------|----------|---|----------|-------|
| WANG_SM    | 157 | 0.49565  | 2.323904 | 0 | 0        | 0     |
| PICCALUGA  | 192 | 0.484652 | 2.313886 | 0 | 0        | 0     |
| LIU_TARGE  | 40  | 0.633013 | 2.311573 | 0 | 0        | 0     |
| WANG_ME    | 32  | 0.663353 | 2.3088   | 0 | 0        | 0     |
| ONDER_CD   | 54  | 0.597549 | 2.297358 | 0 | 3.21E-05 | 0.001 |
| BENNETT_S  | 22  | 0.727866 | 2.295636 | 0 | 3.12E-05 | 0.001 |
| HUPER_BR   | 59  | 0.571365 | 2.293372 | 0 | 3.05E-05 | 0.001 |
| SMIRNOV_   | 155 | 0.491484 | 2.286377 | 0 | 5.92E-05 | 0.002 |
| GRAHAM_I   | 63  | 0.569249 | 2.285899 | 0 | 5.77E-05 | 0.002 |
| PRAMOON    | 48  | 0.591069 | 2.28403  | 0 | 5.64E-05 | 0.002 |
| RIGGINS_T  | 208 | 0.465666 | 2.262708 | 0 | 8.32E-05 | 0.003 |
| CHANG_IM   | 47  | 0.595705 | 2.258928 | 0 | 8.13E-05 | 0.003 |
| HENDRICKS  | 47  | 0.592845 | 2.255618 | 0 | 7.95E-05 | 0.003 |
| AMIT_EGF_  | 65  | 0.559197 | 2.25472  | 0 | 7.79E-05 | 0.003 |
| RICKMAN_   | 364 | 0.43431  | 2.251587 | 0 | 7.62E-05 | 0.003 |
| CHARAFE_I  | 435 | 0.424498 | 2.248678 | 0 | 7.47E-05 | 0.003 |
| TAKEDA_T/  | 147 | 0.487256 | 2.248242 | 0 | 7.32E-05 | 0.003 |
| PODAR_RE   | 142 | 0.487316 | 2.242055 | 0 | 9.58E-05 | 0.004 |
| GILDEA_MI  | 30  | 0.664021 | 2.229203 | 0 | 9.39E-05 | 0.004 |
| JEON_SMA   | 23  | 0.683169 | 2.22482  | 0 | 9.22E-05 | 0.004 |
| VANHARAN   | 63  | 0.548974 | 2.218002 | 0 | 9.05E-05 | 0.004 |
| YAO_TEMP   | 67  | 0.54569  | 2.217606 | 0 | 8.88E-05 | 0.004 |
| DER_IFN_A  | 56  | 0.564425 | 2.210776 | 0 | 8.72E-05 | 0.004 |
| AMIT_EGF_  | 39  | 0.609587 | 2.209976 | 0 | 8.57E-05 | 0.004 |
| MAHADEV/   | 16  | 0.748241 | 2.209027 | 0 | 8.42E-05 | 0.004 |
| MANALO_I   | 193 | 0.460969 | 2.208596 | 0 | 8.28E-05 | 0.004 |
| NAGASHIM   | 58  | 0.557273 | 2.202813 | 0 | 8.14E-05 | 0.004 |
| HELLEBREK  | 56  | 0.56766  | 2.202602 | 0 | 8.01E-05 | 0.004 |
| SEKI_INFLA | 73  | 0.52853  | 2.202579 | 0 | 7.88E-05 | 0.004 |
| DAUER_ST/  | 37  | 0.615187 | 2.20121  | 0 | 7.75E-05 | 0.004 |
| BIOCARTA_  | 17  | 0.746394 | 2.198624 | 0 | 7.63E-05 | 0.004 |
| BEGUM_T/   | 36  | 0.60876  | 2.195535 | 0 | 9.32E-05 | 0.005 |
| KRASNOSEI  | 30  | 0.632091 | 2.193383 | 0 | 1.46E-04 | 0.008 |
| JAEGER_M   | 249 | 0.446416 | 2.192454 | 0 | 1.44E-04 | 0.008 |

|           |     |          |          |   |          |       |
|-----------|-----|----------|----------|---|----------|-------|
| SHEDDEN_  | 188 | 0.458036 | 2.191855 | 0 | 1.41E-04 | 0.008 |
| AMIT_SERU | 65  | 0.536924 | 2.191242 | 0 | 1.39E-04 | 0.008 |
| SCHUETZ_E | 337 | 0.42299  | 2.190212 | 0 | 1.37E-04 | 0.008 |
| HORIUCHI_ | 278 | 0.436505 | 2.185714 | 0 | 1.70E-04 | 0.01  |
| TSAI_RESP | 30  | 0.635782 | 2.184003 | 0 | 1.85E-04 | 0.011 |
| RICKMAN_  | 100 | 0.493422 | 2.179813 | 0 | 1.82E-04 | 0.011 |
| KIM_WT1_  | 208 | 0.446363 | 2.178399 | 0 | 1.80E-04 | 0.011 |
| DELYS_THY | 388 | 0.416089 | 2.171774 | 0 | 1.77E-04 | 0.011 |
| XU_HGF_T/ | 16  | 0.732107 | 2.166799 | 0 | 2.07E-04 | 0.013 |
| ELVIDGE_H | 100 | 0.496479 | 2.165234 | 0 | 2.04E-04 | 0.013 |
| BERENJENC | 32  | 0.629008 | 2.164999 | 0 | 2.02E-04 | 0.013 |
| FRIDMAN_  | 75  | 0.520095 | 2.164978 | 0 | 1.99E-04 | 0.013 |
| BIOCARTA_ | 17  | 0.736686 | 2.159759 | 0 | 2.27E-04 | 0.015 |
| LIU_VAV3_ | 84  | 0.501945 | 2.15747  | 0 | 2.39E-04 | 0.016 |
| FRASOR_RI | 62  | 0.522971 | 2.142793 | 0 | 3.25E-04 | 0.022 |
| SIMBULAN_ | 27  | 0.640784 | 2.141205 | 0 | 3.21E-04 | 0.022 |
| RHEIN_ALL | 75  | 0.509743 | 2.139633 | 0 | 3.17E-04 | 0.022 |
| UDAYAKUM  | 232 | 0.436309 | 2.131987 | 0 | 3.84E-04 | 0.027 |
| LIU_SOX4_ | 130 | 0.46815  | 2.129202 | 0 | 3.94E-04 | 0.028 |
| EMT_NSCL  | 254 | 0.429599 | 2.128889 | 0 | 3.89E-04 | 0.028 |
| EINAV_INT | 27  | 0.648119 | 2.126973 | 0 | 3.85E-04 | 0.028 |
| DAUER_ST/ | 37  | 0.595637 | 2.113216 | 0 | 4.35E-04 | 0.032 |
| OSWALD_F  | 217 | 0.432735 | 2.109999 | 0 | 4.70E-04 | 0.035 |
| KINSEY_TA | 307 | 0.418125 | 2.109105 | 0 | 4.65E-04 | 0.035 |
| OSWALD_F  | 217 | 0.432735 | 2.108392 | 0 | 4.73E-04 | 0.036 |
| LU_AGING_ | 252 | 0.42056  | 2.107556 | 0 | 4.81E-04 | 0.037 |
| OSADA_AS  | 24  | 0.649473 | 2.106729 | 0 | 4.89E-04 | 0.038 |
| TAKEDA_T/ | 133 | 0.457201 | 2.104497 | 0 | 4.96E-04 | 0.039 |
| MAHADEV/  | 19  | 0.684952 | 2.103781 | 0 | 5.16E-04 | 0.041 |
| AMIT_SERU | 57  | 0.535033 | 2.102679 | 0 | 5.11E-04 | 0.041 |
| HOFFMANI  | 51  | 0.544763 | 2.101305 | 0 | 5.19E-04 | 0.042 |
| CHIARADOI | 137 | 0.458533 | 2.100396 | 0 | 5.38E-04 | 0.044 |
| DANG_REG  | 235 | 0.426816 | 2.098686 | 0 | 5.57E-04 | 0.046 |
| AKL_HTLV1 | 65  | 0.516591 | 2.09613  | 0 | 5.63E-04 | 0.047 |

|           |     |          |          |   |          |       |
|-----------|-----|----------|----------|---|----------|-------|
| KOBAYASH  | 17  | 0.709204 | 2.095785 | 0 | 5.70E-04 | 0.048 |
| ZHU_CMV_  | 31  | 0.60597  | 2.092684 | 0 | 6.34E-04 | 0.054 |
| AMIT_EGF_ | 42  | 0.568481 | 2.092193 | 0 | 6.51E-04 | 0.056 |
| HAHTOLA_  | 61  | 0.515292 | 2.091059 | 0 | 6.45E-04 | 0.056 |
| TAKEDA_T/ | 179 | 0.438082 | 2.090065 | 0 | 6.50E-04 | 0.057 |
| CHIBA_RES | 43  | 0.578968 | 2.085615 | 0 | 6.67E-04 | 0.059 |
| BROWNE_I  | 107 | 0.468323 | 2.085601 | 0 | 6.61E-04 | 0.059 |
| FOSTER_IN | 143 | 0.449148 | 2.077954 | 0 | 7.75E-04 | 0.07  |
| LIU_PROST | 449 | 0.394876 | 2.077272 | 0 | 7.68E-04 | 0.07  |
| KEGG_ECM  | 80  | 0.489685 | 2.076471 | 0 | 7.62E-04 | 0.07  |
| CHARAFE_I | 117 | 0.462904 | 2.072185 | 0 | 8.09E-04 | 0.075 |
| UZONYI_RE | 36  | 0.574514 | 2.071265 | 0 | 8.34E-04 | 0.078 |
| FOSTER_IN | 363 | 0.398    | 2.070784 | 0 | 8.26E-04 | 0.078 |
| FARMER_B  | 39  | 0.567941 | 2.070749 | 0 | 8.19E-04 | 0.078 |
| MAHAJAN_  | 63  | 0.511772 | 2.064959 | 0 | 8.75E-04 | 0.084 |
| RODRIGUE: | 67  | 0.507278 | 2.060121 | 0 | 9.70E-04 | 0.094 |
| APPEL_IMA | 33  | 0.584666 | 2.058423 | 0 | 9.82E-04 | 0.096 |
| BLUM_RES  | 241 | 0.418366 | 2.055993 | 0 | 9.94E-04 | 0.098 |
| KYNG_DNA  | 98  | 0.466825 | 2.054869 | 0 | 9.96E-04 | 0.098 |
| VERHAAK_  | 177 | 0.426655 | 2.051279 | 0 | 0.001037 | 0.103 |
| THEILGAAR | 75  | 0.488087 | 2.050966 | 0 | 0.001029 | 0.103 |
| ZHOU_INFI | 383 | 0.393498 | 2.04666  | 0 | 0.00107  | 0.108 |
| ONDER_CD  | 244 | 0.415588 | 2.044309 | 0 | 0.0011   | 0.112 |
| MCLACHLA  | 198 | 0.422154 | 2.042045 | 0 | 0.00114  | 0.116 |
| TONKS_TAI | 152 | 0.438748 | 2.04088  | 0 | 0.00115  | 0.117 |
| SENGUPTA  | 165 | 0.432171 | 2.039546 | 0 | 0.001161 | 0.119 |
| CORRE_ML  | 64  | 0.499107 | 2.035861 | 0 | 0.001189 | 0.123 |
| ZHU_CMV_  | 71  | 0.496    | 2.028866 | 0 | 0.001311 | 0.136 |
| VECCHI_GA | 153 | 0.43706  | 2.027735 | 0 | 0.001347 | 0.14  |
| BOYLAN_M  | 226 | 0.410903 | 2.026785 | 0 | 0.001346 | 0.141 |
| ZHANG_IN  | 21  | 0.649705 | 2.026515 | 0 | 0.001336 | 0.141 |
| ROZANOV_  | 257 | 0.407866 | 2.024101 | 0 | 0.001326 | 0.141 |
| TAKEDA_T/ | 36  | 0.560278 | 2.022152 | 0 | 0.001334 | 0.143 |
| CROONQUI  | 45  | 0.540481 | 2.021279 | 0 | 0.001369 | 0.147 |

|            |     |          |          |   |          |       |
|------------|-----|----------|----------|---|----------|-------|
| SESTO_RES  | 69  | 0.495645 | 2.020958 | 0 | 0.001359 | 0.147 |
| LENAOUR_   | 90  | 0.473515 | 2.018372 | 0 | 0.001411 | 0.154 |
| TIEN_INTE  | 203 | 0.416859 | 2.018274 | 0 | 0.001401 | 0.154 |
| REACTOME   | 79  | 0.481914 | 2.017522 | 0 | 0.001399 | 0.155 |
| LIEN_BREA  | 77  | 0.487127 | 2.01679  | 0 | 0.001415 | 0.157 |
| KEGG_HEM   | 81  | 0.481034 | 2.016028 | 0 | 0.001414 | 0.157 |
| ZHU_CMV_   | 53  | 0.513181 | 2.01551  | 0 | 0.001404 | 0.157 |
| HASLINGER  | 19  | 0.656429 | 2.007934 | 0 | 0.00147  | 0.164 |
| COLIN_PILC | 26  | 0.608091 | 2.007298 | 0 | 0.001476 | 0.166 |
| CERVERA_S  | 109 | 0.450905 | 2.006873 | 0 | 0.001466 | 0.166 |
| RODWELL_   | 323 | 0.393584 | 2.006523 | 0 | 0.001456 | 0.166 |
| RUTELLA_R  | 404 | 0.384514 | 2.002827 | 0 | 0.001479 | 0.167 |
| RADAEVA_   | 32  | 0.566863 | 2.001897 | 0 | 0.001486 | 0.169 |
| TONKS_TAI  | 181 | 0.418565 | 2.000832 | 0 | 0.001516 | 0.173 |
| DEBIASI_AF | 241 | 0.405633 | 1.999514 | 0 | 0.001546 | 0.177 |
| REACTOME   | 82  | 0.474152 | 1.997793 | 0 | 0.001616 | 0.185 |
| HUANG_FC   | 36  | 0.558044 | 1.994573 | 0 | 0.001724 | 0.196 |
| BOYALT_I   | 17  | 0.680259 | 1.992663 | 0 | 0.001776 | 0.203 |
| ZHOU_INFL  | 431 | 0.380146 | 1.991526 | 0 | 0.001796 | 0.206 |
| JISON_SICK | 175 | 0.413665 | 1.99101  | 0 | 0.001808 | 0.209 |
| BACODOD_   | 19  | 0.648173 | 1.990251 | 0 | 0.001804 | 0.21  |
| MARKEY_R   | 199 | 0.412436 | 1.989944 | 0 | 0.0018   | 0.21  |
| MCLACHLA   | 224 | 0.401545 | 1.989652 | 0 | 0.001805 | 0.211 |
| LI_PROSTA  | 27  | 0.603537 | 1.988846 | 0 | 0.001801 | 0.212 |
| MENSE_HY   | 94  | 0.457226 | 1.988806 | 0 | 0.001797 | 0.213 |
| ZHU_CMV_   | 31  | 0.579945 | 1.988548 | 0 | 0.001786 | 0.213 |
| UROSEVIC_  | 16  | 0.669328 | 1.987307 | 0 | 0.001842 | 0.221 |
| FULCHER_I  | 424 | 0.379708 | 1.983561 | 0 | 0.00192  | 0.231 |
| ZHANG_AN   | 24  | 0.622405 | 1.982538 | 0 | 0.001945 | 0.235 |
| TURASHVIL  | 91  | 0.454319 | 1.982229 | 0 | 0.001948 | 0.237 |
| SENESE_HC  | 219 | 0.407667 | 1.977743 | 0 | 0.002059 | 0.252 |
| DER_IFN_B  | 81  | 0.466072 | 1.975654 | 0 | 0.002098 | 0.259 |
| MITSIADES  | 423 | 0.376911 | 1.970431 | 0 | 0.002302 | 0.278 |
| DOANE_BR   | 32  | 0.574405 | 1.968726 | 0 | 0.002345 | 0.283 |

|           |     |          |          |          |          |       |
|-----------|-----|----------|----------|----------|----------|-------|
| GARGALOV  | 18  | 0.651937 | 1.967622 | 0.001754 | 0.002338 | 0.284 |
| BECKER_TA | 36  | 0.541713 | 1.965681 | 0        | 0.002381 | 0.291 |
| TONKS_TAI | 179 | 0.413163 | 1.964286 | 0        | 0.002388 | 0.292 |
| GRUETZMA  | 339 | 0.380693 | 1.963133 | 0        | 0.002403 | 0.294 |
| TURASHVIL | 65  | 0.487393 | 1.962689 | 0        | 0.002403 | 0.296 |
| KONDO_EZ  | 139 | 0.422725 | 1.960449 | 0        | 0.002473 | 0.306 |
| BERTUCCI_ | 156 | 0.414744 | 1.959739 | 0        | 0.002472 | 0.307 |
| GOZGIT_ES | 137 | 0.421273 | 1.959067 | 0        | 0.002479 | 0.309 |
| GRAHAM_(  | 23  | 0.609124 | 1.958158 | 0        | 0.002478 | 0.311 |
| FRIDMAN_  | 33  | 0.550587 | 1.951969 | 0        | 0.00264  | 0.327 |
| RUIZ_TNC_ | 145 | 0.422816 | 1.951719 | 0        | 0.002632 | 0.327 |
| CHANDRAN  | 92  | 0.444153 | 1.947979 | 0        | 0.002758 | 0.342 |
| RIGGI_EWI | 175 | 0.407657 | 1.947319 | 0        | 0.00277  | 0.344 |
| CHIARADOI | 47  | 0.519501 | 1.946184 | 0.001684 | 0.002814 | 0.35  |
| CHIARADOI | 131 | 0.427078 | 1.941379 | 0        | 0.003075 | 0.375 |
| TAKEDA_T/ | 165 | 0.410279 | 1.938028 | 0        | 0.003169 | 0.386 |
| CHEN_LVAI | 41  | 0.537139 | 1.937762 | 0.001667 | 0.003159 | 0.386 |
| SHI_SPARC | 23  | 0.610421 | 1.937321 | 0        | 0.003161 | 0.389 |
| MYLLYKAN  | 16  | 0.666928 | 1.937256 | 0        | 0.003151 | 0.39  |
| REACTOME  | 67  | 0.471626 | 1.933337 | 0        | 0.003269 | 0.402 |
| KEGG_LEIS | 67  | 0.473563 | 1.932408 | 0        | 0.003283 | 0.405 |
| RORIE_TAR | 25  | 0.596164 | 1.932279 | 0        | 0.003272 | 0.406 |
| RUGO_ENV  | 28  | 0.575146 | 1.927266 | 0        | 0.003525 | 0.427 |
| KRIGE_AMI | 26  | 0.585726 | 1.926281 | 0.001698 | 0.003576 | 0.431 |
| GRAHAM_(  | 44  | 0.518211 | 1.926146 | 0        | 0.003557 | 0.431 |
| TAKEDA_T/ | 29  | 0.570318 | 1.926133 | 0        | 0.003539 | 0.431 |
| AMIT_EGF_ | 156 | 0.411591 | 1.925923 | 0        | 0.00354  | 0.432 |
| KEGG_JAK_ | 151 | 0.417738 | 1.924869 | 0        | 0.003552 | 0.435 |
| BIOCARTA_ | 33  | 0.55396  | 1.924399 | 0        | 0.003552 | 0.437 |
| CASORELLI | 164 | 0.406883 | 1.924242 | 0        | 0.003547 | 0.439 |
| LINDSTEDT | 56  | 0.486431 | 1.923315 | 0        | 0.003565 | 0.442 |
| KEGG_SMA  | 82  | 0.456146 | 1.923184 | 0        | 0.003554 | 0.443 |
| GERY_CEBF | 113 | 0.434117 | 1.922955 | 0        | 0.003548 | 0.444 |
| KEGG_CELL | 125 | 0.426785 | 1.922163 | 0        | 0.003572 | 0.446 |

|            |     |          |          |          |          |       |
|------------|-----|----------|----------|----------|----------|-------|
| DORSAM_H   | 29  | 0.567097 | 1.9211   | 0.001704 | 0.003596 | 0.45  |
| HAN_SATB   | 310 | 0.378951 | 1.920808 | 0        | 0.003584 | 0.451 |
| HALMOS_C   | 40  | 0.529529 | 1.91961  | 0        | 0.003613 | 0.454 |
| CREIGHTON  | 447 | 0.36399  | 1.91858  | 0        | 0.003625 | 0.455 |
| WANG_ESC   | 105 | 0.434521 | 1.917763 | 0        | 0.003625 | 0.458 |
| SWEET_LUI  | 393 | 0.371823 | 1.916175 | 0        | 0.003677 | 0.465 |
| TSENG_IRS  | 122 | 0.423925 | 1.915811 | 0        | 0.003677 | 0.467 |
| GARCIA_TA  | 44  | 0.514182 | 1.914233 | 0        | 0.003768 | 0.475 |
| BROWNE_H   | 141 | 0.413234 | 1.913908 | 0        | 0.003761 | 0.477 |
| RODWELL_   | 142 | 0.414548 | 1.912825 | 0        | 0.003772 | 0.478 |
| LEE_META   | 74  | 0.461077 | 1.910582 | 0.001577 | 0.003878 | 0.486 |
| LINDSTEDT  | 53  | 0.49155  | 1.908652 | 0        | 0.004001 | 0.496 |
| BROCKE_AI  | 139 | 0.417193 | 1.907364 | 0        | 0.004028 | 0.502 |
| HOSHIDA_I  | 228 | 0.390873 | 1.906827 | 0        | 0.004015 | 0.503 |
| LIANG_HEM  | 35  | 0.533652 | 1.906071 | 0.001718 | 0.004041 | 0.508 |
| LANDIS_ER  | 36  | 0.537371 | 1.905036 | 0        | 0.004083 | 0.512 |
| LEE_LIVER_ | 59  | 0.478041 | 1.900736 | 0        | 0.004294 | 0.528 |
| BROWNE_H   | 168 | 0.406383 | 1.898508 | 0        | 0.004383 | 0.539 |
| SAKAI_CHR  | 32  | 0.541206 | 1.898355 | 0.001724 | 0.004369 | 0.54  |
| KORKOLA_U  | 32  | 0.545231 | 1.896288 | 0.001704 | 0.004496 | 0.551 |
| ZHOU_INFL  | 489 | 0.358741 | 1.894215 | 0        | 0.004637 | 0.565 |
| SUNG_MET   | 105 | 0.425635 | 1.892682 | 0        | 0.004676 | 0.567 |
| AMIT_EGF_  | 58  | 0.472909 | 1.892209 | 0.001567 | 0.004682 | 0.568 |
| TARTE_PLA  | 372 | 0.362083 | 1.890811 | 0        | 0.004784 | 0.576 |
| SENESE_HC  | 420 | 0.364955 | 1.890551 | 0        | 0.004768 | 0.577 |
| LEE_LIVER_ | 15  | 0.646105 | 1.89017  | 0        | 0.004779 | 0.582 |
| HINATA_NI  | 64  | 0.468375 | 1.886222 | 0        | 0.005021 | 0.601 |
| SESTO_RES  | 20  | 0.610962 | 1.885075 | 0.008375 | 0.005052 | 0.606 |
| DIAZ_CHRC  | 114 | 0.421019 | 1.884211 | 0        | 0.005108 | 0.614 |
| BROWNE_H   | 53  | 0.482419 | 1.882197 | 0        | 0.005221 | 0.624 |
| JIANG_TIP  | 44  | 0.491296 | 1.880575 | 0        | 0.005302 | 0.633 |
| SIMBULAN   | 30  | 0.551696 | 1.879517 | 0.001695 | 0.005336 | 0.636 |
| MASSARWI   | 56  | 0.471367 | 1.877191 | 0        | 0.005482 | 0.647 |
| RUTELLA_R  | 324 | 0.366429 | 1.876321 | 0        | 0.005515 | 0.651 |

|            |     |          |          |          |          |       |
|------------|-----|----------|----------|----------|----------|-------|
| RUTELLA_R  | 391 | 0.360146 | 1.876172 | 0        | 0.005497 | 0.652 |
| RICKMAN_   | 106 | 0.429572 | 1.8755   | 0        | 0.005525 | 0.658 |
| LIANG_SILE | 20  | 0.608952 | 1.873386 | 0.001681 | 0.005668 | 0.668 |
| ELVIDGE_H  | 86  | 0.442417 | 1.873307 | 0        | 0.005655 | 0.669 |
| LINDGREN_  | 374 | 0.362527 | 1.87215  | 0        | 0.005691 | 0.671 |
| KYNG_ENV   | 30  | 0.550117 | 1.870303 | 0        | 0.005797 | 0.679 |
| KEGG_CYT   | 257 | 0.37529  | 1.87019  | 0        | 0.005788 | 0.681 |
| KHETCHOU   | 44  | 0.4998   | 1.869784 | 0.001623 | 0.005775 | 0.681 |
| NAKAYAMA   | 41  | 0.513659 | 1.869739 | 0        | 0.005756 | 0.681 |
| KANG_CISF  | 19  | 0.610447 | 1.869696 | 0        | 0.005737 | 0.681 |
| LANDIS_ER  | 134 | 0.406149 | 1.869194 | 0        | 0.005758 | 0.684 |
| ST_GA12_F  | 21  | 0.588663 | 1.867959 | 0.003419 | 0.005817 | 0.692 |
| GAUSSMAN   | 73  | 0.451671 | 1.865219 | 0        | 0.005948 | 0.699 |
| TSUNODA_   | 27  | 0.545562 | 1.865072 | 0.003425 | 0.005933 | 0.699 |
| VALK_AML   | 33  | 0.53851  | 1.864473 | 0        | 0.005944 | 0.701 |
| KEGG_FOC   | 194 | 0.388503 | 1.862534 | 0        | 0.00603  | 0.709 |
| KOKKINAKI  | 124 | 0.417078 | 1.858696 | 0        | 0.006306 | 0.724 |
| PUIFFE_IN  | 141 | 0.403826 | 1.858449 | 0        | 0.006304 | 0.725 |
| KANG_FLU   | 16  | 0.640989 | 1.857166 | 0.001783 | 0.006379 | 0.73  |
| HELLER_SIL | 239 | 0.373423 | 1.854191 | 0        | 0.006566 | 0.744 |
| MCBRYAN_   | 185 | 0.389294 | 1.853717 | 0        | 0.006583 | 0.748 |
| DER_IFN_G  | 57  | 0.476081 | 1.85279  | 0.00161  | 0.006614 | 0.748 |
| HELLER_HC  | 235 | 0.371783 | 1.852764 | 0        | 0.006588 | 0.748 |
| GEORGANT   | 17  | 0.625695 | 1.852452 | 0.003396 | 0.006572 | 0.748 |
| VERHAAK_   | 237 | 0.373464 | 1.850994 | 0        | 0.00669  | 0.76  |
| KIM_RESPC  | 126 | 0.411211 | 1.850912 | 0        | 0.006665 | 0.76  |
| WANG_HCI   | 80  | 0.443899 | 1.850279 | 0        | 0.00669  | 0.762 |
| REACTOME   | 82  | 0.437484 | 1.849858 | 0        | 0.006678 | 0.764 |
| MIDORIKAI  | 36  | 0.511962 | 1.848495 | 0        | 0.006767 | 0.772 |
| RUTELLA_R  | 306 | 0.364373 | 1.847216 | 0        | 0.006819 | 0.775 |
| MORI_EML   | 16  | 0.629284 | 1.84578  | 0.003454 | 0.006866 | 0.779 |
| MUELLER_I  | 42  | 0.492726 | 1.84525  | 0        | 0.006876 | 0.779 |
| ICHIBA_GR  | 117 | 0.413093 | 1.843296 | 0        | 0.006989 | 0.785 |
| MCBRYAN_   | 235 | 0.376803 | 1.842586 | 0        | 0.007034 | 0.789 |



|            |     |          |          |          |          |       |
|------------|-----|----------|----------|----------|----------|-------|
| ROZANOV_   | 33  | 0.516574 | 1.840892 | 0        | 0.00715  | 0.794 |
| FUJII_YBX1 | 27  | 0.560496 | 1.840254 | 0.001842 | 0.007164 | 0.794 |
| CHUNG_BL   | 40  | 0.50878  | 1.83999  | 0        | 0.00716  | 0.795 |
| HELLER_SIL | 87  | 0.428186 | 1.838923 | 0        | 0.007195 | 0.799 |
| YAO_TEMP   | 67  | 0.448267 | 1.83852  | 0        | 0.007186 | 0.8   |
| STOSSI_RE  | 36  | 0.518744 | 1.838473 | 0.0016   | 0.007165 | 0.8   |
| RASHI_RES  | 37  | 0.515992 | 1.83751  | 0        | 0.007226 | 0.804 |
| DAVICIONI_ | 248 | 0.368647 | 1.836825 | 0        | 0.007252 | 0.806 |
| XU_HGF_SI  | 34  | 0.516154 | 1.835698 | 0        | 0.007335 | 0.811 |
| BOYALT_I   | 25  | 0.55542  | 1.834857 | 0        | 0.007399 | 0.816 |
| CONCANN    | 232 | 0.368256 | 1.834516 | 0        | 0.007394 | 0.817 |
| BERENJENC  | 40  | 0.502435 | 1.833464 | 0        | 0.007453 | 0.819 |
| ZHANG_AN   | 41  | 0.491567 | 1.832908 | 0.001709 | 0.007466 | 0.82  |
| KIM_LRRC3  | 29  | 0.529281 | 1.830617 | 0        | 0.00765  | 0.827 |
| HALMOS_C   | 41  | 0.495426 | 1.830013 | 0        | 0.007691 | 0.829 |
| GARGALOV   | 124 | 0.402206 | 1.827688 | 0        | 0.007841 | 0.835 |
| LE_SKI_TAF | 16  | 0.636244 | 1.826788 | 0.005291 | 0.007911 | 0.84  |
| FARMER_B   | 16  | 0.621075 | 1.825893 | 0.008389 | 0.007959 | 0.842 |
| TENEDINI_I | 53  | 0.463506 | 1.823745 | 0        | 0.008102 | 0.845 |
| PETRETTO_  | 33  | 0.521374 | 1.823708 | 0.003367 | 0.008078 | 0.846 |
| RUTELLA_R  | 239 | 0.36677  | 1.823096 | 0        | 0.008117 | 0.85  |
| COULOUAF   | 85  | 0.423183 | 1.822346 | 0        | 0.008147 | 0.852 |
| FARMER_B   | 15  | 0.632909 | 1.821963 | 0.007143 | 0.00814  | 0.854 |
| LEE_LIVER_ | 59  | 0.455714 | 1.821763 | 0        | 0.008116 | 0.854 |
| WINTER_H   | 211 | 0.375843 | 1.820282 | 0        | 0.008215 | 0.855 |
| DE_YY1_TA  | 17  | 0.606188 | 1.819042 | 0.003317 | 0.008305 | 0.861 |
| MCBRYAN_   | 107 | 0.417016 | 1.817186 | 0        | 0.008467 | 0.866 |
| WALLACE_I  | 271 | 0.35918  | 1.814366 | 0        | 0.00867  | 0.875 |
| REACTOME   | 82  | 0.431057 | 1.814118 | 0.001543 | 0.008666 | 0.876 |
| LAIHO_COL  | 107 | 0.405876 | 1.813826 | 0        | 0.008669 | 0.877 |
| SHAFFER_II | 65  | 0.447655 | 1.811748 | 0        | 0.00884  | 0.881 |
| NEWMAN_    | 26  | 0.542635 | 1.810954 | 0.003328 | 0.008886 | 0.883 |
| TONKS_TAI  | 42  | 0.485378 | 1.808493 | 0.001724 | 0.009052 | 0.889 |
| KEGG_ARR   | 73  | 0.439649 | 1.80634  | 0        | 0.009204 | 0.894 |

|            |     |          |          |          |          |       |
|------------|-----|----------|----------|----------|----------|-------|
| VERRECCHI  | 50  | 0.469022 | 1.805371 | 0.001605 | 0.009253 | 0.894 |
| HOEBEKE_I  | 84  | 0.426219 | 1.804345 | 0        | 0.009308 | 0.897 |
| CLASPER_L  | 19  | 0.598984 | 1.803695 | 0.007055 | 0.009325 | 0.898 |
| AMIT_DELA  | 17  | 0.609711 | 1.800585 | 0.003503 | 0.009588 | 0.906 |
| TIEN_INTES | 48  | 0.472173 | 1.797936 | 0.001661 | 0.009826 | 0.912 |
| CERVERA_S  | 103 | 0.411011 | 1.797669 | 0        | 0.009825 | 0.912 |
| MACLACHL   | 16  | 0.625464 | 1.797662 | 0.005226 | 0.009793 | 0.912 |
| CAIRO_HEF  | 203 | 0.370563 | 1.796702 | 0        | 0.009851 | 0.913 |
| MISHRA_C   | 22  | 0.562562 | 1.796617 | 0.003384 | 0.009823 | 0.913 |
| MAHADEV    | 19  | 0.590678 | 1.796419 | 0.003503 | 0.009815 | 0.913 |
| ROSS_AML   | 51  | 0.470753 | 1.796147 | 0        | 0.009826 | 0.913 |
| GEISS_RESF | 31  | 0.511858 | 1.794401 | 0.001712 | 0.009982 | 0.916 |
| GENTILE_U  | 30  | 0.521747 | 1.793295 | 0.001639 | 0.010054 | 0.919 |
| AMIT_EGF_  | 20  | 0.572022 | 1.793236 | 0.006633 | 0.010026 | 0.919 |
| BIOCARTA_  | 33  | 0.509244 | 1.792758 | 0.001608 | 0.010037 | 0.921 |
| KIM_WT1_   | 157 | 0.38034  | 1.791592 | 0        | 0.01016  | 0.926 |
| FLECHNER_  | 39  | 0.486075 | 1.791321 | 0.001595 | 0.010147 | 0.926 |
| HOEGERKO   | 16  | 0.618207 | 1.787388 | 0.005181 | 0.010501 | 0.936 |
| GARGALOV   | 17  | 0.608517 | 1.785305 | 0.010187 | 0.010703 | 0.937 |
| BASSO_CD   | 95  | 0.411651 | 1.781786 | 0        | 0.011052 | 0.94  |
| OKUMURA    | 180 | 0.371213 | 1.77912  | 0        | 0.011366 | 0.944 |
| REACTOME   | 23  | 0.553462 | 1.778894 | 0.005137 | 0.011382 | 0.944 |
| BOYLAN_M   | 71  | 0.435528 | 1.778598 | 0        | 0.011377 | 0.945 |
| BIOCARTA_  | 16  | 0.624422 | 1.777184 | 0.003367 | 0.011504 | 0.949 |
| WOO_LIVE   | 103 | 0.40134  | 1.776149 | 0        | 0.011615 | 0.951 |
| HUPER_BR   | 53  | 0.453789 | 1.775431 | 0        | 0.011653 | 0.952 |
| ADDYA_ER   | 59  | 0.448797 | 1.77533  | 0        | 0.011628 | 0.952 |
| SEIDEN_ON  | 83  | 0.412849 | 1.774538 | 0        | 0.011684 | 0.952 |
| DUTTA_AP   | 31  | 0.515937 | 1.772869 | 0        | 0.011898 | 0.957 |
| SENESE_HC  | 214 | 0.360877 | 1.772342 | 0        | 0.011946 | 0.958 |
| HAN_SATB   | 315 | 0.34983  | 1.772088 | 0        | 0.011943 | 0.958 |
| CHEBOTAE   | 115 | 0.39362  | 1.77183  | 0        | 0.011951 | 0.958 |
| ODONNELL   | 387 | 0.342713 | 1.771158 | 0        | 0.012001 | 0.961 |
| DORSEY_G   | 22  | 0.552846 | 1.771115 | 0.003344 | 0.011986 | 0.961 |

|            |     |          |          |          |          |       |
|------------|-----|----------|----------|----------|----------|-------|
| REACTOME   | 116 | 0.397837 | 1.769877 | 0        | 0.012122 | 0.961 |
| SESTO_RES  | 53  | 0.457483 | 1.769642 | 0.001626 | 0.012107 | 0.961 |
| LI_CISPLAT | 28  | 0.524952 | 1.769388 | 0.003378 | 0.012111 | 0.961 |
| COATES_M   | 62  | 0.438223 | 1.768892 | 0        | 0.012135 | 0.962 |
| AMIT_SERL  | 32  | 0.509319 | 1.767832 | 0.001653 | 0.012254 | 0.964 |
| HARRIS_HY  | 77  | 0.425934 | 1.767164 | 0.003049 | 0.012296 | 0.964 |
| CROMER_M   | 60  | 0.447119 | 1.764366 | 0.00491  | 0.012606 | 0.967 |
| KORKOLA_   | 49  | 0.456416 | 1.762485 | 0        | 0.012824 | 0.972 |
| ZHAN_MUI   | 17  | 0.599818 | 1.761617 | 0.005495 | 0.012895 | 0.973 |
| BOYLAN_M   | 80  | 0.421287 | 1.761471 | 0        | 0.012879 | 0.973 |
| HESS_TARC  | 69  | 0.432013 | 1.757904 | 0.001582 | 0.013281 | 0.976 |
| FONTAINE_  | 25  | 0.540589 | 1.757035 | 0.003268 | 0.013402 | 0.977 |
| MCBRYAN_   | 32  | 0.50537  | 1.756976 | 0.001745 | 0.013367 | 0.977 |
| AIYAR_COE  | 37  | 0.48708  | 1.75686  | 0.003226 | 0.013353 | 0.978 |
| BROWNE_I   | 97  | 0.399046 | 1.755712 | 0        | 0.013462 | 0.978 |
| AMIT_EGF_  | 19  | 0.571406 | 1.755373 | 0.008834 | 0.013475 | 0.978 |
| SA_MMP_C   | 15  | 0.61107  | 1.752766 | 0.003454 | 0.013797 | 0.979 |
| SANA_TNF_  | 81  | 0.420119 | 1.749737 | 0.001582 | 0.014191 | 0.983 |
| KOKKINAKI  | 116 | 0.388635 | 1.748003 | 0        | 0.014457 | 0.984 |
| ODONNELL   | 77  | 0.41467  | 1.747788 | 0        | 0.014447 | 0.984 |
| BROWNE_I   | 288 | 0.344474 | 1.746346 | 0        | 0.014574 | 0.984 |
| BIOCARTA_  | 29  | 0.523653 | 1.745547 | 0.001751 | 0.014647 | 0.984 |
| WATTEL_A   | 24  | 0.539659 | 1.745295 | 0.005329 | 0.014653 | 0.984 |
| DORN_ADE   | 35  | 0.488214 | 1.742939 | 0.008264 | 0.015003 | 0.985 |
| LINDGREN_  | 135 | 0.37837  | 1.74219  | 0        | 0.015104 | 0.985 |
| SABATES_C  | 126 | 0.383318 | 1.74186  | 0        | 0.015102 | 0.985 |
| KEGG_CON   | 66  | 0.421752 | 1.739259 | 0.00165  | 0.015501 | 0.987 |
| FURUKAWA   | 67  | 0.423235 | 1.738238 | 0.001623 | 0.015626 | 0.987 |
| BROWNE_I   | 83  | 0.405263 | 1.737481 | 0        | 0.015728 | 0.989 |
| CHEN_LVAI  | 100 | 0.402812 | 1.737172 | 0        | 0.015732 | 0.989 |
| KAN_RESPC  | 113 | 0.39024  | 1.737108 | 0        | 0.015696 | 0.989 |
| KIM_WT1_   | 153 | 0.377019 | 1.737104 | 0        | 0.015653 | 0.989 |
| HOOI_ST7_  | 82  | 0.415033 | 1.736776 | 0.00159  | 0.015663 | 0.989 |
| CHIARADOI  | 47  | 0.462616 | 1.732363 | 0.004902 | 0.016369 | 0.992 |

|           |     |          |          |          |          |       |
|-----------|-----|----------|----------|----------|----------|-------|
| MASRI_RES | 19  | 0.565438 | 1.73121  | 0.005386 | 0.016529 | 0.992 |
| ICHIBA_GR | 91  | 0.404079 | 1.73058  | 0        | 0.016572 | 0.992 |
| VANTVEER_ | 217 | 0.354675 | 1.729205 | 0        | 0.016756 | 0.992 |
| VART_KSH  | 132 | 0.380279 | 1.729    | 0        | 0.016753 | 0.992 |
| CHIN_BREA | 20  | 0.559682 | 1.728463 | 0.005119 | 0.016815 | 0.992 |
| KANNAN_T  | 48  | 0.459102 | 1.727769 | 0.003344 | 0.016878 | 0.993 |
| ONDER_CD  | 127 | 0.379871 | 1.727489 | 0        | 0.016875 | 0.993 |
| CLASPER_L | 34  | 0.488387 | 1.727329 | 0.0016   | 0.016869 | 0.993 |
| IZADPANAF | 124 | 0.380264 | 1.726848 | 0        | 0.016894 | 0.993 |
| REACTOME  | 98  | 0.392199 | 1.726233 | 0.001522 | 0.016932 | 0.993 |
| KEGG_GRA  | 32  | 0.507555 | 1.725837 | 0.003367 | 0.016976 | 0.993 |
| REACTOME  | 103 | 0.388221 | 1.725743 | 0.001536 | 0.016944 | 0.993 |
| GRAHAM_(  | 53  | 0.445104 | 1.725311 | 0        | 0.016982 | 0.993 |
| TANG_SEN  | 22  | 0.545552 | 1.724383 | 0.008237 | 0.017072 | 0.993 |
| SENESE_HC | 116 | 0.386379 | 1.723151 | 0.001527 | 0.017243 | 0.993 |
| FLOTHO_PI | 51  | 0.442626 | 1.722498 | 0.003356 | 0.017345 | 0.993 |
| RODRIGUE: | 152 | 0.366354 | 1.719892 | 0        | 0.017742 | 0.994 |
| CHEN_LUN  | 21  | 0.545179 | 1.719574 | 0.006897 | 0.017752 | 0.994 |
| DORN_ADE  | 31  | 0.497973 | 1.719007 | 0.001712 | 0.017802 | 0.994 |
| THUM_SYS  | 393 | 0.328201 | 1.718622 | 0        | 0.017815 | 0.994 |
| WANG_BAI  | 31  | 0.496315 | 1.718288 | 0.006861 | 0.017831 | 0.995 |
| SMID_BRE/ | 296 | 0.343404 | 1.71792  | 0        | 0.017832 | 0.995 |
| VALK_AML  | 36  | 0.477413 | 1.716969 | 0.005155 | 0.017957 | 0.995 |
| REACTOME  | 16  | 0.576718 | 1.716591 | 0.017513 | 0.017952 | 0.995 |
| SENESE_HC | 463 | 0.325216 | 1.715686 | 0        | 0.018073 | 0.995 |
| YAO_TEMP  | 65  | 0.420886 | 1.715673 | 0        | 0.018031 | 0.995 |
| GU_PDEF_  | 31  | 0.49942  | 1.714534 | 0.006757 | 0.018203 | 0.995 |
| KEGG_PAN  | 68  | 0.418134 | 1.714148 | 0.001558 | 0.018215 | 0.995 |
| WIELAND_  | 97  | 0.389992 | 1.713235 | 0.001524 | 0.018377 | 0.995 |
| BIOCARTA_ | 18  | 0.578543 | 1.712625 | 0.014035 | 0.018448 | 0.995 |
| HADDAD_T  | 77  | 0.405033 | 1.711177 | 0.00157  | 0.018674 | 0.995 |
| TAKEDA_T/ | 186 | 0.356656 | 1.71108  | 0        | 0.01864  | 0.995 |
| AMUNDSO   | 175 | 0.359495 | 1.71041  | 0        | 0.018686 | 0.995 |
| KIM_MYCN  | 80  | 0.404547 | 1.709852 | 0.001603 | 0.018732 | 0.995 |

|            |     |          |          |          |          |       |
|------------|-----|----------|----------|----------|----------|-------|
| HOUSTIS_R  | 30  | 0.492962 | 1.708948 | 0.001733 | 0.018828 | 0.995 |
| LAU_APOP   | 54  | 0.435195 | 1.708183 | 0.001634 | 0.018954 | 0.996 |
| LU_IL4_SIG | 61  | 0.42317  | 1.707581 | 0        | 0.019022 | 0.996 |
| GAL_LEUKE  | 125 | 0.376243 | 1.706648 | 0        | 0.019179 | 0.996 |
| KEGG_BLA1  | 40  | 0.466607 | 1.706231 | 0.003356 | 0.019232 | 0.996 |
| DORN_ADE   | 31  | 0.502904 | 1.705994 | 0.009788 | 0.01922  | 0.996 |
| SASSON_RI  | 71  | 0.415608 | 1.705551 | 0.003082 | 0.019235 | 0.996 |
| ROVERSI_G  | 39  | 0.471136 | 1.705476 | 0.001681 | 0.019197 | 0.996 |
| CASORELLI  | 37  | 0.483142 | 1.705389 | 0.008361 | 0.019166 | 0.996 |
| KEGG_PATI  | 321 | 0.334045 | 1.705293 | 0        | 0.019143 | 0.996 |
| MARZEC_IL  | 103 | 0.391007 | 1.704774 | 0        | 0.019172 | 0.996 |
| GARGALOV   | 22  | 0.530021 | 1.704364 | 0.008818 | 0.019195 | 0.996 |
| WEINMANI   | 23  | 0.532277 | 1.703586 | 0.005042 | 0.019316 | 0.997 |
| TSENG_AD   | 42  | 0.462701 | 1.703398 | 0.003252 | 0.019307 | 0.997 |
| PASPYPRI   | 50  | 0.447034 | 1.701435 | 0.003328 | 0.019685 | 0.997 |
| ZHAN_MUI   | 41  | 0.464055 | 1.701204 | 0.001656 | 0.019678 | 0.997 |
| HAHTOLA_   | 15  | 0.602194 | 1.700218 | 0.006849 | 0.019814 | 0.998 |
| SESTO_RES  | 70  | 0.413927 | 1.699297 | 0.001642 | 0.019986 | 0.998 |
| BILBAN_B_  | 38  | 0.465245 | 1.699255 | 0.010239 | 0.019948 | 0.998 |
| HOFFMANI   | 22  | 0.535251 | 1.698405 | 0.010601 | 0.020068 | 0.998 |
| ENK_UV_R   | 497 | 0.320425 | 1.698355 | 0        | 0.020024 | 0.998 |
| GARGALOV   | 67  | 0.419975 | 1.698058 | 0        | 0.020042 | 0.998 |
| RICKMAN_   | 248 | 0.340818 | 1.696253 | 0        | 0.020335 | 0.999 |
| GAJATE_RE  | 50  | 0.433835 | 1.695266 | 0.003115 | 0.020476 | 0.999 |
| KIM_WT1_   | 198 | 0.350929 | 1.694307 | 0        | 0.020646 | 1     |
| BIOCARTA_  | 20  | 0.556384 | 1.694061 | 0.006803 | 0.020657 | 1     |
| LIU_CMYB_  | 156 | 0.360751 | 1.693517 | 0        | 0.020701 | 1     |
| WOTTON_I   | 17  | 0.579952 | 1.693192 | 0.014901 | 0.020723 | 1     |
| VECCHI_GA  | 338 | 0.332398 | 1.693087 | 0        | 0.020714 | 1     |
| ENGELMAN   | 63  | 0.422362 | 1.693047 | 0        | 0.020669 | 1     |
| KEGG_RIBC  | 85  | 0.401546 | 1.692728 | 0        | 0.020666 | 1     |
| LIU_VAV3_  | 17  | 0.570704 | 1.692406 | 0.01275  | 0.020669 | 1     |
| KEGG_DILA  | 89  | 0.391039 | 1.690596 | 0        | 0.020965 | 1     |
| KOBAYASH   | 18  | 0.556498 | 1.690584 | 0.010638 | 0.020918 | 1     |

|            |     |          |          |          |          |   |
|------------|-----|----------|----------|----------|----------|---|
| ASTON_M/   | 46  | 0.448255 | 1.690067 | 0.003419 | 0.020974 | 1 |
| KYNG_DNA   | 17  | 0.564266 | 1.686799 | 0.016043 | 0.021564 | 1 |
| WEIGEL_O/  | 56  | 0.425722 | 1.684831 | 0.001608 | 0.021937 | 1 |
| FERRANDO   | 75  | 0.404576 | 1.684212 | 0        | 0.021989 | 1 |
| GENTILE_U  | 241 | 0.34025  | 1.683347 | 0        | 0.022083 | 1 |
| FERRANDO   | 17  | 0.569292 | 1.682932 | 0.012727 | 0.022107 | 1 |
| DAVICIONI_ | 166 | 0.35531  | 1.68267  | 0        | 0.022125 | 1 |
| REACTOME   | 116 | 0.376741 | 1.681687 | 0.001475 | 0.02228  | 1 |
| MATTIOLI_  | 35  | 0.477732 | 1.681624 | 0.010345 | 0.022247 | 1 |
| TURASHVIL  | 87  | 0.393508 | 1.680968 | 0        | 0.022326 | 1 |
| MUELLER_   | 23  | 0.536134 | 1.680585 | 0.023256 | 0.022322 | 1 |
| SEITZ_NEO  | 30  | 0.496515 | 1.679074 | 0.008278 | 0.022621 | 1 |
| MARZEC_IL  | 33  | 0.477689 | 1.679055 | 0.008264 | 0.02258  | 1 |
| FERRARI_R  | 16  | 0.565818 | 1.677984 | 0.024096 | 0.022764 | 1 |
| DIRMEIER_  | 52  | 0.42975  | 1.677697 | 0.003263 | 0.022756 | 1 |
| TSAI_RESP  | 118 | 0.372497 | 1.675702 | 0        | 0.023103 | 1 |
| TONKS_TAI  | 16  | 0.569811 | 1.673062 | 0.021661 | 0.023628 | 1 |
| STEARMAN   | 31  | 0.477463 | 1.672404 | 0.005059 | 0.023736 | 1 |
| RUGO_RES   | 17  | 0.564266 | 1.671843 | 0.006981 | 0.023795 | 1 |
| BILD_CTNN  | 71  | 0.404607 | 1.671768 | 0        | 0.023757 | 1 |
| STREICHER_ | 19  | 0.55449  | 1.670454 | 0.003509 | 0.023966 | 1 |
| LANDIS_BR  | 64  | 0.412647 | 1.66843  | 0.00316  | 0.024325 | 1 |
| LI_CISPLAT | 33  | 0.471455 | 1.667778 | 0.006667 | 0.024426 | 1 |
| MARCHINI_  | 45  | 0.439686 | 1.666765 | 0.006483 | 0.024571 | 1 |
| CASTELLAN  | 55  | 0.43063  | 1.666765 | 0.007911 | 0.024518 | 1 |
| VART_KSH   | 160 | 0.35181  | 1.665638 | 0        | 0.024722 | 1 |
| YAO_TEMP   | 63  | 0.417592 | 1.664652 | 0.003448 | 0.02489  | 1 |
| REACTOME   | 320 | 0.324666 | 1.659739 | 0        | 0.026063 | 1 |
| GARGALOV   | 68  | 0.40812  | 1.658352 | 0.003072 | 0.026295 | 1 |
| CHIARADOI  | 106 | 0.377823 | 1.657875 | 0.001634 | 0.026386 | 1 |
| NELSON_RI  | 81  | 0.388929 | 1.657199 | 0.003035 | 0.026451 | 1 |
| ENGELMAN   | 47  | 0.429508 | 1.65697  | 0.006791 | 0.026454 | 1 |
| DOUGLAS_   | 274 | 0.330393 | 1.656319 | 0        | 0.026546 | 1 |
| LI_CYTIDIN | 16  | 0.560241 | 1.656217 | 0.01083  | 0.026515 | 1 |

|            |     |          |          |          |          |   |
|------------|-----|----------|----------|----------|----------|---|
| DORN_ADE   | 23  | 0.519228 | 1.655783 | 0.012069 | 0.026556 | 1 |
| GRATIAS_R  | 17  | 0.557726 | 1.654402 | 0.017212 | 0.026818 | 1 |
| YAO_TEMP   | 28  | 0.48585  | 1.653358 | 0.010345 | 0.027052 | 1 |
| LEONARD_   | 33  | 0.469368 | 1.652615 | 0.011986 | 0.027185 | 1 |
| GAZDA_DI/  | 38  | 0.45996  | 1.650975 | 0.006981 | 0.027478 | 1 |
| ZUCCHI_M/  | 27  | 0.498538 | 1.650375 | 0.015464 | 0.027593 | 1 |
| BOHN_PRII  | 25  | 0.502483 | 1.650228 | 0.012259 | 0.027573 | 1 |
| VALK_AML   | 31  | 0.48223  | 1.649545 | 0.001634 | 0.027631 | 1 |
| PICCALUGA  | 125 | 0.359148 | 1.649056 | 0        | 0.027666 | 1 |
| KYNG_DNA   | 32  | 0.466371 | 1.64788  | 0.010239 | 0.02792  | 1 |
| FARMER_B   | 322 | 0.32144  | 1.646622 | 0        | 0.028183 | 1 |
| IZADPANAF  | 102 | 0.372396 | 1.645421 | 0.001608 | 0.028425 | 1 |
| TAKEDA_T/  | 126 | 0.360654 | 1.645229 | 0.004292 | 0.028409 | 1 |
| KEGG_STAI  | 41  | 0.44513  | 1.643462 | 0.008418 | 0.028809 | 1 |
| BIOCARTA_  | 15  | 0.574767 | 1.641292 | 0.016334 | 0.029373 | 1 |
| TIAN_TNF_  | 16  | 0.56429  | 1.639586 | 0.02069  | 0.029722 | 1 |
| PEPPER_CF  | 33  | 0.464664 | 1.639499 | 0.017094 | 0.029699 | 1 |
| GAUSSMAN   | 29  | 0.480309 | 1.639467 | 0.016639 | 0.02966  | 1 |
| ZHAN_MUI   | 39  | 0.451355 | 1.638911 | 0.008636 | 0.029759 | 1 |
| NGUYEN_N   | 64  | 0.402983 | 1.638009 | 0.00312  | 0.029953 | 1 |
| AMIT_EGF_  | 42  | 0.445496 | 1.634444 | 0.013722 | 0.03102  | 1 |
| NAKAMUR,   | 264 | 0.331212 | 1.634103 | 0        | 0.031045 | 1 |
| RUTELLA_R  | 226 | 0.331661 | 1.632511 | 0        | 0.031444 | 1 |
| CROMER_T   | 44  | 0.435726 | 1.630188 | 0.010101 | 0.032041 | 1 |
| BARRIER_C  | 16  | 0.56154  | 1.629196 | 0.02385  | 0.032242 | 1 |
| REACTOME   | 18  | 0.552186 | 1.629115 | 0.017271 | 0.032204 | 1 |
| NIKOLSKY_  | 21  | 0.526258 | 1.628628 | 0.017668 | 0.032281 | 1 |
| REACTOME   | 16  | 0.558894 | 1.628445 | 0.018966 | 0.03227  | 1 |
| CHIBA_RES  | 18  | 0.539376 | 1.628099 | 0.014519 | 0.032299 | 1 |
| SENESE_HC  | 107 | 0.362426 | 1.627775 | 0.001531 | 0.032328 | 1 |
| LEE_LIVER_ | 41  | 0.442824 | 1.627524 | 0.008224 | 0.032357 | 1 |
| KEGG_THYI  | 28  | 0.486775 | 1.626448 | 0.006981 | 0.032611 | 1 |
| JI_METAST. | 23  | 0.515183 | 1.625356 | 0.012153 | 0.032849 | 1 |
| LIAO_HAVE  | 38  | 0.45211  | 1.624849 | 0.01528  | 0.032925 | 1 |

|            |     |          |          |          |          |   |
|------------|-----|----------|----------|----------|----------|---|
| DORN_ADE   | 26  | 0.481335 | 1.624843 | 0.014414 | 0.03286  | 1 |
| MURATA_\   | 16  | 0.553052 | 1.624634 | 0.01642  | 0.032864 | 1 |
| RIGGI_EWI  | 398 | 0.314157 | 1.624571 | 0        | 0.03283  | 1 |
| REACTOME   | 92  | 0.376338 | 1.624373 | 0        | 0.032841 | 1 |
| YAMASHIT/  | 55  | 0.40522  | 1.623832 | 0.006309 | 0.032961 | 1 |
| YAMASHIT/  | 46  | 0.429345 | 1.62275  | 0.006329 | 0.033254 | 1 |
| KEGG_ERBI  | 85  | 0.378866 | 1.621414 | 0.003091 | 0.03362  | 1 |
| SENGUPTA   | 331 | 0.313878 | 1.621086 | 0        | 0.033681 | 1 |
| SWEET_LUI  | 421 | 0.309474 | 1.620985 | 0        | 0.033644 | 1 |
| BASSO_HA   | 78  | 0.387595 | 1.620602 | 0.003263 | 0.033693 | 1 |
| SCHEIDERE  | 15  | 0.566478 | 1.620073 | 0.017153 | 0.033765 | 1 |
| CUI_TCF21  | 27  | 0.484608 | 1.620061 | 0.01642  | 0.033705 | 1 |
| TAVOR_CEI  | 21  | 0.51459  | 1.619688 | 0.022222 | 0.033754 | 1 |
| KEGG_VIR#  | 63  | 0.401822 | 1.619332 | 0.004815 | 0.033782 | 1 |
| RUGO_STR   | 32  | 0.466371 | 1.618922 | 0.009934 | 0.033846 | 1 |
| BIOCARTA_  | 31  | 0.469394 | 1.618842 | 0.020202 | 0.033805 | 1 |
| BAELDE_DI  | 35  | 0.45442  | 1.618834 | 0.003344 | 0.033743 | 1 |
| REACTOME   | 111 | 0.364905 | 1.618321 | 0.001493 | 0.033838 | 1 |
| KAPOSI_LIV | 17  | 0.539026 | 1.61798  | 0.019713 | 0.033856 | 1 |
| NAKAYAM/   | 70  | 0.394826 | 1.615875 | 0.006441 | 0.03441  | 1 |
| GAUSSMA#   | 130 | 0.353426 | 1.615798 | 0.00303  | 0.034366 | 1 |
| SASSON_RI  | 69  | 0.392967 | 1.615313 | 0.00311  | 0.034467 | 1 |
| KEGG_APO   | 87  | 0.37693  | 1.614792 | 0        | 0.034582 | 1 |
| AMIT_SERL  | 38  | 0.445546 | 1.614473 | 0.003356 | 0.034623 | 1 |
| YAGI_AML_  | 35  | 0.450897 | 1.614399 | 0.01318  | 0.034569 | 1 |
| DEURIG_T_  | 298 | 0.317193 | 1.612666 | 0        | 0.03508  | 1 |
| INGA_TP53  | 16  | 0.551457 | 1.61063  | 0.016216 | 0.035618 | 1 |
| BASAKI_YB  | 345 | 0.313115 | 1.610156 | 0        | 0.035696 | 1 |
| BIOCARTA_  | 17  | 0.530209 | 1.609824 | 0.017331 | 0.035713 | 1 |
| SMID_BRE/  | 446 | 0.30752  | 1.60973  | 0        | 0.03568  | 1 |
| OLSSON_E;  | 27  | 0.482304 | 1.60943  | 0.014085 | 0.035697 | 1 |
| SMITH_TEF  | 69  | 0.391656 | 1.608288 | 0.006452 | 0.035948 | 1 |
| SHAFFER_II | 36  | 0.442071 | 1.607133 | 0.008292 | 0.036227 | 1 |
| REACTOME   | 19  | 0.527661 | 1.606554 | 0.027826 | 0.036398 | 1 |



|            |     |          |          |          |          |   |
|------------|-----|----------|----------|----------|----------|---|
| KOYAMA_S   | 218 | 0.329035 | 1.606264 | 0        | 0.036416 | 1 |
| SASSON_RI  | 72  | 0.385433 | 1.604794 | 0.006088 | 0.036796 | 1 |
| FARMER_B   | 313 | 0.314762 | 1.603445 | 0        | 0.037174 | 1 |
| TOOKER_RI  | 74  | 0.381604 | 1.601219 | 0.011058 | 0.037801 | 1 |
| LEE_NEUR/  | 115 | 0.358945 | 1.598431 | 0.001548 | 0.038576 | 1 |
| LEE_LIVER_ | 41  | 0.442824 | 1.59773  | 0.010309 | 0.038724 | 1 |
| KLEIN_PRIN | 55  | 0.40449  | 1.59747  | 0.008091 | 0.03873  | 1 |
| GHO_ATF5   | 15  | 0.560743 | 1.597329 | 0.034539 | 0.038706 | 1 |
| ZHANG_RE   | 16  | 0.558812 | 1.597163 | 0.032759 | 0.038697 | 1 |
| AMUNDSO    | 78  | 0.37663  | 1.595291 | 0.004967 | 0.03923  | 1 |
| REACTOME   | 21  | 0.507097 | 1.595077 | 0.021886 | 0.039212 | 1 |
| BIOCARTA_  | 16  | 0.54313  | 1.593592 | 0.023214 | 0.039664 | 1 |
| BERENJENC  | 348 | 0.310455 | 1.5934   | 0        | 0.039653 | 1 |
| REACTOME   | 65  | 0.396381 | 1.592826 | 0.003279 | 0.039819 | 1 |
| MILI_PSEU  | 416 | 0.306664 | 1.59153  | 0        | 0.04016  | 1 |
| LINDGREN_  | 215 | 0.328123 | 1.589982 | 0        | 0.040587 | 1 |
| TOOKER_G   | 74  | 0.381604 | 1.588854 | 0.009132 | 0.040875 | 1 |
| AIGNER_ZE  | 29  | 0.469561 | 1.587925 | 0.016639 | 0.041153 | 1 |
| KEGG_NOE   | 61  | 0.399353 | 1.587895 | 0.006525 | 0.04109  | 1 |
| LEE_LIVER_ | 61  | 0.389959 | 1.586358 | 0.009836 | 0.041538 | 1 |
| BROWNE_I   | 47  | 0.42023  | 1.585971 | 0.014851 | 0.041621 | 1 |
| BILBAN_B_  | 60  | 0.398288 | 1.585732 | 0.011475 | 0.041626 | 1 |
| WENDT_CC   | 28  | 0.46809  | 1.585687 | 0.025597 | 0.041572 | 1 |
| ZHU_CMV_   | 59  | 0.402575 | 1.585313 | 0.009615 | 0.041639 | 1 |
| CHIARETTI_ | 26  | 0.469277 | 1.584227 | 0.020374 | 0.042003 | 1 |
| LEE_NEUR/  | 144 | 0.339022 | 1.58352  | 0.001447 | 0.042198 | 1 |
| NAM_FXYC   | 17  | 0.538739 | 1.583259 | 0.019366 | 0.042207 | 1 |
| MARSON_F   | 22  | 0.504799 | 1.582159 | 0.026502 | 0.04257  | 1 |
| REACTOME   | 48  | 0.408679 | 1.581954 | 0.009983 | 0.042588 | 1 |
| ZHAN_MUI   | 41  | 0.4234   | 1.581441 | 0.008347 | 0.042682 | 1 |
| KEGG_MET   | 58  | 0.401263 | 1.581014 | 0.014901 | 0.042776 | 1 |
| RODRIGUE:  | 118 | 0.353487 | 1.580539 | 0.003017 | 0.04287  | 1 |
| ZHAN_MUI   | 37  | 0.434375 | 1.579619 | 0.014151 | 0.043085 | 1 |
| BILD_SRC_I | 55  | 0.405859 | 1.579202 | 0.009615 | 0.043162 | 1 |

|            |     |          |          |          |          |   |
|------------|-----|----------|----------|----------|----------|---|
| REACTOME   | 39  | 0.427786 | 1.578992 | 0.020478 | 0.04316  | 1 |
| LINDSTEDT  | 58  | 0.399704 | 1.578661 | 0.011513 | 0.0432   | 1 |
| TOOKER_G   | 122 | 0.348616 | 1.578489 | 0.004478 | 0.043205 | 1 |
| BROWNE_I   | 52  | 0.403687 | 1.578124 | 0.019969 | 0.043276 | 1 |
| SUH_COEX   | 17  | 0.530777 | 1.577886 | 0.021898 | 0.04326  | 1 |
| TONKS_TAI  | 52  | 0.410766 | 1.577709 | 0.016287 | 0.043252 | 1 |
| HOSHIDA_I  | 73  | 0.38298  | 1.576855 | 0.004724 | 0.043481 | 1 |
| TURASHVIL  | 64  | 0.394296 | 1.576338 | 0.010972 | 0.043597 | 1 |
| BIOCARTA_  | 18  | 0.512585 | 1.576242 | 0.035149 | 0.043545 | 1 |
| VERRECCHI  | 19  | 0.519802 | 1.575895 | 0.027539 | 0.043578 | 1 |
| DACOSTA_   | 75  | 0.377846 | 1.574765 | 0.00641  | 0.043898 | 1 |
| VERRECCHI  | 18  | 0.529241 | 1.574366 | 0.037702 | 0.043975 | 1 |
| MOHANKU    | 155 | 0.338388 | 1.572298 | 0.00292  | 0.044608 | 1 |
| BIOCARTA_  | 36  | 0.435901 | 1.572124 | 0.018707 | 0.04459  | 1 |
| REACTOME   | 17  | 0.532861 | 1.571101 | 0.024561 | 0.044843 | 1 |
| ST_TUMOR   | 28  | 0.464839 | 1.570678 | 0.038851 | 0.044958 | 1 |
| ENK_UV_R   | 278 | 0.312524 | 1.570384 | 0        | 0.044996 | 1 |
| TING_SILEN | 27  | 0.464461 | 1.569704 | 0.025338 | 0.045156 | 1 |
| LINDGREN_  | 43  | 0.425017 | 1.569044 | 0.011589 | 0.04536  | 1 |
| FINETTI_BF | 15  | 0.555538 | 1.568091 | 0.03259  | 0.045624 | 1 |
| MASSARWI   | 225 | 0.318047 | 1.567464 | 0        | 0.045764 | 1 |
| KEGG_HYP   | 82  | 0.370502 | 1.567279 | 0.01248  | 0.045758 | 1 |
| MONNIER_   | 311 | 0.307114 | 1.567061 | 0.001339 | 0.045789 | 1 |
| KEGG_TOLI  | 100 | 0.359537 | 1.566512 | 0.001538 | 0.045915 | 1 |
| TOOKER_R   | 122 | 0.348616 | 1.563952 | 0.00607  | 0.046762 | 1 |
| LINDSTEDT  | 45  | 0.410963 | 1.560872 | 0.010221 | 0.047891 | 1 |
| BIOCARTA_  | 21  | 0.505695 | 1.559907 | 0.021207 | 0.048174 | 1 |
| YAGI_AML_  | 403 | 0.300423 | 1.55921  | 0        | 0.048379 | 1 |
| BIOCARTA_  | 55  | 0.39283  | 1.5558   | 0.016611 | 0.049685 | 1 |
| LEE_LIVER_ | 59  | 0.39318  | 1.55577  | 0.012618 | 0.049615 | 1 |
| YANG_BRE   | 19  | 0.497427 | 1.555132 | 0.03405  | 0.049772 | 1 |
| NUTT_GBM   | 44  | 0.413537 | 1.554588 | 0.015571 | 0.049956 | 1 |
| KANG_IMN   | 88  | 0.359543 | 1.551576 | 0.00768  | 0.051159 | 1 |
| DOANE_BR   | 48  | 0.407986 | 1.551433 | 0.022298 | 0.051141 | 1 |

|            |     |          |          |          |          |   |
|------------|-----|----------|----------|----------|----------|---|
| BIOCARTA_  | 22  | 0.490116 | 1.550991 | 0.027586 | 0.051239 | 1 |
| JAATINEN_  | 298 | 0.304535 | 1.550483 | 0.001337 | 0.05138  | 1 |
| DE_YY1_TA  | 89  | 0.354359 | 1.5497   | 0.007874 | 0.051591 | 1 |
| SATO_SILEI | 399 | 0.297003 | 1.546678 | 0        | 0.052709 | 1 |
| MCBRYAN_   | 69  | 0.378926 | 1.545262 | 0.018898 | 0.05317  | 1 |
| ROSS_LEUK  | 74  | 0.373173 | 1.544164 | 0.011254 | 0.053502 | 1 |
| SPIRA_SMC  | 38  | 0.426173 | 1.543768 | 0.034602 | 0.05359  | 1 |
| PARK_TRET  | 18  | 0.516248 | 1.543161 | 0.029825 | 0.053757 | 1 |
| DAZARD_U   | 21  | 0.498241 | 1.541369 | 0.033043 | 0.054411 | 1 |
| MCBRYAN_   | 167 | 0.322033 | 1.541253 | 0        | 0.054382 | 1 |
| KYNG_DNA   | 26  | 0.464387 | 1.540484 | 0.022968 | 0.054614 | 1 |
| SHAFFER_II | 95  | 0.357432 | 1.54018  | 0.009404 | 0.054664 | 1 |
| GAURNIER_  | 54  | 0.39055  | 1.539661 | 0.026016 | 0.05478  | 1 |
| XU_AKT1_1  | 24  | 0.475417 | 1.538437 | 0.043178 | 0.055275 | 1 |
| HUTTMANI   | 261 | 0.307033 | 1.537916 | 0        | 0.055418 | 1 |
| HELLER_HC  | 242 | 0.308657 | 1.537031 | 0.001385 | 0.055732 | 1 |
| FAELT_B_C  | 45  | 0.409551 | 1.536885 | 0.021523 | 0.055709 | 1 |
| GAUSSMAN   | 152 | 0.330353 | 1.5361   | 0.001441 | 0.055983 | 1 |
| BIOCARTA_  | 17  | 0.517999 | 1.53605  | 0.021016 | 0.055908 | 1 |
| WONG_EN    | 18  | 0.520596 | 1.535874 | 0.037866 | 0.055892 | 1 |
| RUGO_UV_   | 26  | 0.464387 | 1.53565  | 0.030875 | 0.055914 | 1 |
| ROPERO_H   | 89  | 0.355253 | 1.535616 | 0.01454  | 0.055843 | 1 |
| LEE_LIVER_ | 58  | 0.388921 | 1.535368 | 0.011345 | 0.055831 | 1 |
| FRASOR_RI  | 29  | 0.45949  | 1.534243 | 0.025253 | 0.05622  | 1 |
| MATSUDA_   | 423 | 0.29337  | 1.533797 | 0        | 0.056278 | 1 |
| PARK_TRET  | 25  | 0.468496 | 1.531622 | 0.032787 | 0.057178 | 1 |
| REACTOME   | 28  | 0.454641 | 1.531508 | 0.02109  | 0.057124 | 1 |
| NING_CHRI  | 59  | 0.381446 | 1.531278 | 0.009539 | 0.057133 | 1 |
| KEGG_FC_C  | 94  | 0.349411 | 1.530602 | 0.004747 | 0.057357 | 1 |
| TONKS_TAI  | 195 | 0.316838 | 1.529751 | 0.002899 | 0.05765  | 1 |
| SMID_BRE/  | 80  | 0.361569 | 1.527967 | 0.009245 | 0.05834  | 1 |
| LEE_LIVER_ | 57  | 0.39033  | 1.527646 | 0.010017 | 0.058404 | 1 |
| BROWNE_H   | 474 | 0.287888 | 1.527447 | 0        | 0.058377 | 1 |
| DAZARD_R   | 81  | 0.365908 | 1.52706  | 0.010972 | 0.058463 | 1 |

|            |     |          |          |          |          |   |
|------------|-----|----------|----------|----------|----------|---|
| ZHAN_V1_I  | 31  | 0.436125 | 1.526248 | 0.023891 | 0.058738 | 1 |
| REACTOME   | 56  | 0.385472 | 1.525214 | 0.016103 | 0.059143 | 1 |
| SAGIV_CD2  | 44  | 0.404166 | 1.52449  | 0.02385  | 0.05939  | 1 |
| HUTTMANI   | 57  | 0.383659 | 1.524488 | 0.022082 | 0.059298 | 1 |
| ZHAN_LATI  | 23  | 0.481977 | 1.524291 | 0.032986 | 0.059288 | 1 |
| ABE_VEGF/  | 19  | 0.49977  | 1.524123 | 0.036728 | 0.059275 | 1 |
| REACTOME   | 57  | 0.380583 | 1.521324 | 0.018957 | 0.060501 | 1 |
| CHIANG_LI' | 142 | 0.334209 | 1.520682 | 0        | 0.060721 | 1 |
| GRADE_CO   | 27  | 0.451563 | 1.519505 | 0.035413 | 0.06115  | 1 |
| TOMLINS_I  | 39  | 0.417117 | 1.516352 | 0.020513 | 0.062609 | 1 |
| YANG_BRE.  | 18  | 0.513787 | 1.515986 | 0.026132 | 0.062689 | 1 |
| BERENJENC  | 24  | 0.476084 | 1.514882 | 0.039519 | 0.06313  | 1 |
| DASU_IL6_  | 56  | 0.382456 | 1.514827 | 0.016    | 0.063049 | 1 |
| WOOD_EB'   | 45  | 0.403584 | 1.514788 | 0.023529 | 0.062968 | 1 |
| TIAN_TNF_  | 21  | 0.4823   | 1.514451 | 0.028381 | 0.063035 | 1 |
| DAZARD_U   | 17  | 0.51113  | 1.514447 | 0.046931 | 0.062939 | 1 |
| BIOCARTA_  | 23  | 0.469411 | 1.514237 | 0.032086 | 0.062961 | 1 |
| LEE_LIVER_ | 58  | 0.376277 | 1.512419 | 0.014377 | 0.063792 | 1 |
| ZHAN_MUI   | 49  | 0.394165 | 1.512223 | 0.025641 | 0.063792 | 1 |
| FOURNIER_  | 19  | 0.499495 | 1.511632 | 0.048986 | 0.063989 | 1 |
| REACTOME   | 47  | 0.396511 | 1.511504 | 0.027539 | 0.063954 | 1 |
| HOFFMANI   | 18  | 0.501629 | 1.510519 | 0.049404 | 0.064357 | 1 |
| VERRECCHI  | 36  | 0.418713 | 1.510513 | 0.025554 | 0.064263 | 1 |
| ROYLANCE_  | 32  | 0.434448 | 1.509482 | 0.035    | 0.064711 | 1 |
| MORI_PRE_  | 65  | 0.370427 | 1.509363 | 0.014827 | 0.064669 | 1 |
| HOFMANN    | 24  | 0.470968 | 1.509103 | 0.033275 | 0.064718 | 1 |
| WU_SILEN   | 44  | 0.399901 | 1.508732 | 0.023729 | 0.064811 | 1 |
| CHO_NR4A   | 23  | 0.471301 | 1.508556 | 0.043919 | 0.064819 | 1 |
| KEGG_OTH   | 16  | 0.516236 | 1.50832  | 0.05     | 0.06483  | 1 |
| ROY_WOU    | 45  | 0.395753 | 1.506142 | 0.025338 | 0.065842 | 1 |
| HENDRICKS  | 38  | 0.410868 | 1.504581 | 0.014851 | 0.06655  | 1 |
| WOOD_EB'   | 100 | 0.3424   | 1.503827 | 0.00936  | 0.066799 | 1 |
| GENTILE_U  | 33  | 0.428466 | 1.50333  | 0.028381 | 0.066998 | 1 |
| ST_WNT_B   | 31  | 0.43     | 1.502705 | 0.033956 | 0.067186 | 1 |

|           |     |          |          |          |          |   |
|-----------|-----|----------|----------|----------|----------|---|
| LIEN_BREA | 33  | 0.442906 | 1.502575 | 0.033841 | 0.067146 | 1 |
| TARTE_PLA | 74  | 0.359793 | 1.502467 | 0.012945 | 0.067111 | 1 |
| GNATENKC  | 33  | 0.429013 | 1.501282 | 0.031524 | 0.06758  | 1 |
| IVANOVA_I | 71  | 0.362495 | 1.500851 | 0.019969 | 0.067691 | 1 |
| KYNG_DNA  | 39  | 0.411563 | 1.499949 | 0.035273 | 0.068067 | 1 |
| CROONQUI  | 15  | 0.529545 | 1.499423 | 0.057793 | 0.068244 | 1 |
| BIOCARTA_ | 19  | 0.495147 | 1.499271 | 0.040925 | 0.068222 | 1 |
| GOLDRATH  | 56  | 0.384446 | 1.498683 | 0.018364 | 0.068441 | 1 |
| KAAB_HEA  | 236 | 0.307067 | 1.497923 | 0.002778 | 0.06877  | 1 |
| BIOCARTA_ | 32  | 0.434265 | 1.497066 | 0.030844 | 0.069175 | 1 |
| TRAYNOR_  | 22  | 0.474223 | 1.496749 | 0.054237 | 0.069225 | 1 |
| BIOCARTA_ | 46  | 0.393454 | 1.496045 | 0.02385  | 0.069476 | 1 |
| SENGUPTA  | 369 | 0.289438 | 1.495606 | 0        | 0.069633 | 1 |
| JIANG_HYP | 215 | 0.306368 | 1.495281 | 0.002813 | 0.069697 | 1 |
| YANG_BRE  | 25  | 0.450798 | 1.495233 | 0.05151  | 0.069616 | 1 |
| GU_PDEF_  | 67  | 0.371141 | 1.494864 | 0.023401 | 0.069677 | 1 |
| HUANG_FC  | 45  | 0.405492 | 1.494835 | 0.028381 | 0.069597 | 1 |
| SESTO_RES | 37  | 0.419417 | 1.494272 | 0.034539 | 0.069823 | 1 |
| WINTER_H  | 45  | 0.401051 | 1.493835 | 0.030151 | 0.069927 | 1 |
| CHIANG_LI | 138 | 0.324559 | 1.492864 | 0.006024 | 0.07034  | 1 |
| KEGG_DRU  | 62  | 0.366835 | 1.491294 | 0.0192   | 0.071085 | 1 |
| RUGO_STR  | 39  | 0.411563 | 1.491076 | 0.0256   | 0.071103 | 1 |
| CHEMNITZ  | 341 | 0.290951 | 1.489906 | 0        | 0.071662 | 1 |
| ACEVEDO_  | 275 | 0.296223 | 1.488443 | 0.002732 | 0.072358 | 1 |
| DACOSTA_  | 28  | 0.436849 | 1.487573 | 0.046745 | 0.072677 | 1 |
| KEGG_ARA  | 54  | 0.381102 | 1.486289 | 0.022544 | 0.073242 | 1 |
| TONKS_TAI | 19  | 0.481174 | 1.48452  | 0.049002 | 0.074087 | 1 |
| BIOCARTA_ | 17  | 0.500819 | 1.483456 | 0.049296 | 0.074577 | 1 |
| KEGG_AXO  | 128 | 0.325073 | 1.482987 | 0.007669 | 0.074727 | 1 |
| ELLWOOD_  | 33  | 0.434142 | 1.482034 | 0.033929 | 0.075177 | 1 |
| GENTILE_U | 48  | 0.381863 | 1.481589 | 0.043974 | 0.075272 | 1 |
| TOMLINS_I | 33  | 0.420043 | 1.481497 | 0.042808 | 0.075214 | 1 |
| XU_GH1_A  | 118 | 0.326755 | 1.479759 | 0.014196 | 0.076074 | 1 |
| LE_EGR2_T | 97  | 0.342891 | 1.478591 | 0.015129 | 0.076684 | 1 |

|            |     |          |          |          |          |   |
|------------|-----|----------|----------|----------|----------|---|
| BERENJENC  | 27  | 0.448767 | 1.478587 | 0.046205 | 0.076578 | 1 |
| GESERICK_  | 20  | 0.471223 | 1.47833  | 0.037906 | 0.076623 | 1 |
| MARSON_F   | 36  | 0.411276 | 1.478322 | 0.033445 | 0.076519 | 1 |
| BRUECKNE   | 110 | 0.328832 | 1.47811  | 0.012384 | 0.076515 | 1 |
| SATO_SILEI | 43  | 0.39501  | 1.477641 | 0.032929 | 0.076659 | 1 |
| OLSSON_E   | 19  | 0.479619 | 1.477443 | 0.052189 | 0.076661 | 1 |
| DOANE_BR   | 69  | 0.358685 | 1.476121 | 0.014446 | 0.077303 | 1 |
| TAVOR_CEI  | 43  | 0.395485 | 1.476011 | 0.028617 | 0.077281 | 1 |
| BOYLAN_M   | 37  | 0.414216 | 1.475962 | 0.040636 | 0.077202 | 1 |
| ST_INTEGR  | 76  | 0.35114  | 1.475598 | 0.018868 | 0.077276 | 1 |
| TAKEDA_T   | 81  | 0.346705 | 1.474699 | 0.012384 | 0.077693 | 1 |
| BIOCARTA_  | 15  | 0.512422 | 1.474077 | 0.060137 | 0.077963 | 1 |
| BIOCARTA_  | 27  | 0.440936 | 1.474037 | 0.041379 | 0.077874 | 1 |
| GINESTIER_ | 103 | 0.331929 | 1.473692 | 0.013575 | 0.077971 | 1 |
| BHATI_G2M  | 126 | 0.324065 | 1.47365  | 0.010279 | 0.077885 | 1 |
| ONDER_CD   | 163 | 0.315508 | 1.472733 | 0.007299 | 0.07823  | 1 |
| VALK_AML   | 26  | 0.438933 | 1.471873 | 0.051155 | 0.078648 | 1 |
| BROWNE_I   | 53  | 0.383676 | 1.471043 | 0.033167 | 0.079043 | 1 |
| GOTTWEIN   | 60  | 0.369889 | 1.470383 | 0.023847 | 0.079328 | 1 |
| TAKADA_G   | 22  | 0.465075 | 1.469547 | 0.044326 | 0.079707 | 1 |
| REACTOME   | 21  | 0.473809 | 1.469262 | 0.058201 | 0.079764 | 1 |
| PAPASPYRI  | 43  | 0.404268 | 1.468723 | 0.035831 | 0.080024 | 1 |
| ZHAN_MUI   | 46  | 0.392021 | 1.468324 | 0.038961 | 0.080144 | 1 |
| VALK_AML   | 23  | 0.463476 | 1.467622 | 0.061856 | 0.080468 | 1 |
| KEGG_ACU   | 55  | 0.37468  | 1.46655  | 0.030695 | 0.081    | 1 |
| BERNARD_   | 53  | 0.374912 | 1.4657   | 0.039216 | 0.081412 | 1 |
| DANG_MY    | 30  | 0.431428 | 1.464663 | 0.044905 | 0.081922 | 1 |
| REACTOME   | 64  | 0.360353 | 1.463504 | 0.0209   | 0.082518 | 1 |
| CHIBA_RES  | 38  | 0.402588 | 1.462347 | 0.033389 | 0.083056 | 1 |
| ZHANG_TA   | 83  | 0.34295  | 1.461994 | 0.015456 | 0.083145 | 1 |
| TURASHVIL  | 67  | 0.360684 | 1.46086  | 0.030894 | 0.083693 | 1 |
| SMITH_TEF  | 127 | 0.318947 | 1.460838 | 0.009317 | 0.08359  | 1 |
| KANG_IMN   | 99  | 0.329909 | 1.46061  | 0.018018 | 0.083613 | 1 |
| SASSON_RI  | 70  | 0.359226 | 1.459868 | 0.028708 | 0.083911 | 1 |

|            |     |          |          |          |          |   |
|------------|-----|----------|----------|----------|----------|---|
| BIOCARTA_  | 16  | 0.495701 | 1.459763 | 0.063492 | 0.083881 | 1 |
| THUM_MIF   | 17  | 0.491179 | 1.457307 | 0.082474 | 0.085187 | 1 |
| RIZ_ERYTHI | 38  | 0.402487 | 1.457064 | 0.044068 | 0.085192 | 1 |
| EBAUER_T/  | 196 | 0.301161 | 1.456057 | 0.002907 | 0.085666 | 1 |
| RAGHAVAC   | 69  | 0.360572 | 1.454889 | 0.03231  | 0.086269 | 1 |
| KARAKAS_1  | 15  | 0.50584  | 1.452838 | 0.067138 | 0.08746  | 1 |
| WU_HBX_1   | 22  | 0.456586 | 1.452602 | 0.057627 | 0.087503 | 1 |
| WANG_CIS   | 140 | 0.314101 | 1.452521 | 0.004601 | 0.087458 | 1 |
| DASU_IL6_  | 16  | 0.503579 | 1.45228  | 0.058076 | 0.087492 | 1 |
| MANN_RE    | 18  | 0.478065 | 1.449904 | 0.071429 | 0.088869 | 1 |
| REACTOME   | 51  | 0.368802 | 1.449787 | 0.035473 | 0.088818 | 1 |
| LEE_LIVER_ | 53  | 0.366119 | 1.449188 | 0.039683 | 0.089083 | 1 |
| DACOSTA_   | 409 | 0.278937 | 1.448262 | 0        | 0.089547 | 1 |
| ZHAN_MUI   | 43  | 0.385708 | 1.448072 | 0.042693 | 0.089577 | 1 |
| ZHAN_MUI   | 42  | 0.392912 | 1.448062 | 0.041051 | 0.089463 | 1 |
| SNIJDERS_  | 31  | 0.41767  | 1.446711 | 0.042904 | 0.090253 | 1 |
| DAZARD_R   | 152 | 0.310677 | 1.446657 | 0.008511 | 0.090163 | 1 |
| REACTOME   | 96  | 0.335251 | 1.446352 | 0.01461  | 0.09026  | 1 |
| KEGG_O_G   | 26  | 0.432329 | 1.446256 | 0.06446  | 0.090204 | 1 |
| ST_P38_M/  | 35  | 0.401374 | 1.445043 | 0.046552 | 0.090885 | 1 |
| BALDWIN_   | 33  | 0.411695 | 1.444848 | 0.053913 | 0.090911 | 1 |
| REACTOME   | 29  | 0.419179 | 1.444492 | 0.06383  | 0.091024 | 1 |
| KIM_MYCN   | 72  | 0.349335 | 1.442562 | 0.03962  | 0.092245 | 1 |
| AMUNDSO    | 147 | 0.308774 | 1.439935 | 0.010309 | 0.093916 | 1 |
| RADMACHI   | 75  | 0.349722 | 1.439391 | 0.024272 | 0.094132 | 1 |
| GUTIERREZ  | 54  | 0.369058 | 1.438881 | 0.033654 | 0.094325 | 1 |
| KEGG_NAT   | 129 | 0.316033 | 1.437805 | 0.013534 | 0.094864 | 1 |
| FONTAINE_  | 59  | 0.364657 | 1.43751  | 0.032949 | 0.094944 | 1 |
| KEGG_ADH   | 73  | 0.350022 | 1.437305 | 0.029921 | 0.094981 | 1 |
| LOPEZ_EPI  | 16  | 0.502715 | 1.437232 | 0.083624 | 0.094902 | 1 |
| FLECHNER_  | 48  | 0.378644 | 1.436578 | 0.038143 | 0.095191 | 1 |
| REACTOME   | 161 | 0.307159 | 1.43631  | 0.016035 | 0.095249 | 1 |
| SMID_BRE/  | 25  | 0.443866 | 1.4358   | 0.064892 | 0.095478 | 1 |
| STEIN_ESTI | 17  | 0.494759 | 1.433558 | 0.069808 | 0.096891 | 1 |

|            |     |          |          |          |          |   |
|------------|-----|----------|----------|----------|----------|---|
| REACTOME   | 268 | 0.284939 | 1.433246 | 0        | 0.096997 | 1 |
| REACTOME   | 81  | 0.340967 | 1.432898 | 0.030488 | 0.097099 | 1 |
| KEGG_LYSC  | 120 | 0.31838  | 1.432698 | 0.021212 | 0.097153 | 1 |
| LIAN_LIPA_ | 51  | 0.361458 | 1.431679 | 0.034146 | 0.097744 | 1 |
| MCMURRA    | 25  | 0.425188 | 1.430415 | 0.065141 | 0.098465 | 1 |
| REACTOME   | 15  | 0.509811 | 1.429826 | 0.084838 | 0.098733 | 1 |
| BIOCARTA_  | 15  | 0.497255 | 1.429778 | 0.074266 | 0.09864  | 1 |
| BARIS_THY  | 52  | 0.36663  | 1.428503 | 0.050489 | 0.099372 | 1 |
| OUYANG_F   | 18  | 0.470529 | 1.427609 | 0.079646 | 0.099856 | 1 |
| REACTOME   | 27  | 0.425627 | 1.427233 | 0.054237 | 0.099991 | 1 |
| KEGG_MTC   | 51  | 0.368083 | 1.427032 | 0.034483 | 0.1      | 1 |
| IIZUKA_LIV | 20  | 0.450993 | 1.426359 | 0.06518  | 0.100345 | 1 |
| FINAK_BRE  | 25  | 0.432091 | 1.426308 | 0.071553 | 0.100262 | 1 |
| SENESE_HC  | 492 | 0.269456 | 1.425082 | 0.001284 | 0.100992 | 1 |
| YAO_HOXA   | 16  | 0.493397 | 1.423686 | 0.082585 | 0.101861 | 1 |
| REACTOME   | 15  | 0.502884 | 1.423566 | 0.091743 | 0.101836 | 1 |
| BOGNI_TRI  | 28  | 0.41379  | 1.422916 | 0.058929 | 0.102158 | 1 |
| CHEOK_RE!  | 22  | 0.455763 | 1.422493 | 0.087931 | 0.102316 | 1 |
| FARMER_B   | 319 | 0.276646 | 1.420638 | 0.004144 | 0.103491 | 1 |
| FLECHNER_  | 85  | 0.327851 | 1.420453 | 0.022117 | 0.103492 | 1 |
| HASLINGER  | 18  | 0.478576 | 1.419692 | 0.058824 | 0.103898 | 1 |
| KEGG_CHR   | 71  | 0.339692 | 1.418715 | 0.03268  | 0.104518 | 1 |
| MCGARVEY   | 42  | 0.379458 | 1.417545 | 0.054517 | 0.105175 | 1 |
| REACTOME   | 23  | 0.441633 | 1.417017 | 0.072727 | 0.105445 | 1 |
| JI_RESPON! | 53  | 0.358266 | 1.416597 | 0.036007 | 0.105601 | 1 |
| YAMASHIT/  | 74  | 0.339127 | 1.41591  | 0.039823 | 0.105995 | 1 |
| HAHTOLA_   | 27  | 0.425937 | 1.41559  | 0.07309  | 0.106069 | 1 |
| BIOCARTA_  | 18  | 0.472103 | 1.413886 | 0.079038 | 0.107246 | 1 |
| GOLUB_ALI  | 17  | 0.47176  | 1.411863 | 0.098616 | 0.108656 | 1 |
| LANDIS_ER  | 128 | 0.309044 | 1.411659 | 0.019345 | 0.108691 | 1 |
| SESTO_RES  | 46  | 0.375663 | 1.411594 | 0.060656 | 0.108603 | 1 |
| LEE_DOUBI  | 18  | 0.470076 | 1.411401 | 0.076661 | 0.108621 | 1 |
| WINTER_H   | 88  | 0.331003 | 1.411374 | 0.026154 | 0.108516 | 1 |
| RIZKI_TUM  | 54  | 0.356593 | 1.411116 | 0.04085  | 0.108553 | 1 |



|            |     |          |          |          |          |   |
|------------|-----|----------|----------|----------|----------|---|
| NAKAJIMA_  | 30  | 0.408257 | 1.40907  | 0.073826 | 0.110014 | 1 |
| BAELDE_DI  | 30  | 0.411267 | 1.408998 | 0.07109  | 0.109929 | 1 |
| WEST_ADR   | 23  | 0.435801 | 1.408789 | 0.064145 | 0.10996  | 1 |
| BOYALT_I   | 17  | 0.466516 | 1.408109 | 0.101968 | 0.110368 | 1 |
| BONOME_I   | 224 | 0.285935 | 1.407971 | 0.007153 | 0.11032  | 1 |
| SCIBETTA_I | 17  | 0.488215 | 1.407316 | 0.074576 | 0.110644 | 1 |
| REACTOME   | 29  | 0.412107 | 1.406793 | 0.060345 | 0.110866 | 1 |
| WANG_LM    | 339 | 0.274471 | 1.405556 | 0.004087 | 0.111689 | 1 |
| KOKKINAKI  | 68  | 0.347289 | 1.404854 | 0.039746 | 0.112104 | 1 |
| BEIER_GLIC | 60  | 0.352949 | 1.403781 | 0.039409 | 0.112807 | 1 |
| SABATES_C  | 275 | 0.279411 | 1.403243 | 0.01087  | 0.11312  | 1 |
| WANG_ESC   | 79  | 0.334105 | 1.403048 | 0.042925 | 0.113136 | 1 |
| REACTOME   | 93  | 0.328859 | 1.403018 | 0.035874 | 0.11303  | 1 |
| OSADA_AS   | 45  | 0.369826 | 1.402994 | 0.060163 | 0.112911 | 1 |
| KEGG_TRYI  | 37  | 0.391757 | 1.402767 | 0.061258 | 0.112958 | 1 |
| KANG_DOX   | 19  | 0.463732 | 1.401957 | 0.09596  | 0.113399 | 1 |
| CHOW_RA    | 29  | 0.416447 | 1.401393 | 0.068421 | 0.113676 | 1 |
| MOROSETT   | 20  | 0.448159 | 1.399962 | 0.094812 | 0.114629 | 1 |
| MELLMAN_   | 19  | 0.458063 | 1.398827 | 0.09375  | 0.115426 | 1 |
| CHIANG_LI  | 20  | 0.455836 | 1.398499 | 0.1      | 0.11555  | 1 |
| BIOCARTA_  | 20  | 0.46268  | 1.398195 | 0.084691 | 0.115647 | 1 |
| VALK_AML   | 27  | 0.415837 | 1.397627 | 0.068143 | 0.115984 | 1 |
| DIRMEIER_  | 47  | 0.364137 | 1.397605 | 0.039088 | 0.115863 | 1 |
| NEWMAN_    | 35  | 0.395557 | 1.396805 | 0.071057 | 0.11638  | 1 |
| KEGG_GLY   | 22  | 0.435036 | 1.396108 | 0.080342 | 0.116811 | 1 |
| IGARASHI_  | 82  | 0.329047 | 1.39554  | 0.033123 | 0.117143 | 1 |
| ST_DIFFER  | 42  | 0.379532 | 1.394212 | 0.073826 | 0.118019 | 1 |
| RIZ_ERYTH  | 39  | 0.379563 | 1.392336 | 0.075    | 0.119484 | 1 |
| POOLA_INV  | 130 | 0.308449 | 1.391799 | 0.023774 | 0.119784 | 1 |
| LEE_LIVER_ | 55  | 0.360487 | 1.391705 | 0.056075 | 0.119717 | 1 |
| ST_GAQ_P   | 26  | 0.419547 | 1.391173 | 0.094118 | 0.119997 | 1 |
| MARTINEZ_  | 42  | 0.376146 | 1.390101 | 0.049658 | 0.120732 | 1 |
| BONOME_I   | 480 | 0.263089 | 1.390063 | 0.001263 | 0.120619 | 1 |
| PASQUALU   | 254 | 0.279057 | 1.389714 | 0.008451 | 0.120765 | 1 |

|            |     |          |          |          |          |   |
|------------|-----|----------|----------|----------|----------|---|
| COWLING_   | 42  | 0.374515 | 1.388807 | 0.065916 | 0.121352 | 1 |
| MURAKAM    | 20  | 0.449279 | 1.388528 | 0.094527 | 0.12145  | 1 |
| UEDA_PERI  | 143 | 0.303331 | 1.386393 | 0.031532 | 0.1231   | 1 |
| AMIT_EGF_  | 42  | 0.365407 | 1.386233 | 0.067114 | 0.123109 | 1 |
| ST_JNK_M/  | 38  | 0.387268 | 1.384324 | 0.077572 | 0.124574 | 1 |
| WAMUNYC    | 176 | 0.290882 | 1.384283 | 0.017493 | 0.124471 | 1 |
| BIOCARTA_  | 23  | 0.426711 | 1.383441 | 0.10052  | 0.125025 | 1 |
| LUI_THYRC  | 45  | 0.36436  | 1.382552 | 0.056027 | 0.125566 | 1 |
| HOSHIDA_I  | 258 | 0.274368 | 1.382514 | 0.013736 | 0.125439 | 1 |
| STEARMAN   | 110 | 0.312511 | 1.382468 | 0.034125 | 0.125325 | 1 |
| BLALOCK_#  | 379 | 0.2676   | 1.380181 | 0.002642 | 0.127116 | 1 |
| WU_HBX_1   | 21  | 0.439005 | 1.380081 | 0.079038 | 0.127043 | 1 |
| KUMAR_TA   | 362 | 0.266642 | 1.380014 | 0.009296 | 0.126963 | 1 |
| EBAUER_M   | 50  | 0.36363  | 1.379779 | 0.070261 | 0.126982 | 1 |
| KENNY_CTI  | 43  | 0.366609 | 1.37961  | 0.076087 | 0.126976 | 1 |
| YAGI_AML_  | 187 | 0.285754 | 1.37904  | 0.022504 | 0.127304 | 1 |
| CHUANG_C   | 28  | 0.41024  | 1.37879  | 0.092383 | 0.127362 | 1 |
| RODRIGUE:  | 478 | 0.259973 | 1.378418 | 0.002528 | 0.12753  | 1 |
| REACTOME   | 180 | 0.285757 | 1.377928 | 0.026239 | 0.127826 | 1 |
| LIAN_LIPA_ | 64  | 0.343971 | 1.377154 | 0.060855 | 0.128349 | 1 |
| HADDAD_E   | 271 | 0.276064 | 1.373289 | 0.005533 | 0.131409 | 1 |
| VANTVEER_  | 31  | 0.397252 | 1.373268 | 0.089041 | 0.131278 | 1 |
| VALK_AML_  | 27  | 0.413439 | 1.373108 | 0.073084 | 0.13126  | 1 |
| REACTOME   | 18  | 0.446891 | 1.373062 | 0.098446 | 0.131155 | 1 |
| REACTOME   | 58  | 0.342189 | 1.372789 | 0.056385 | 0.131257 | 1 |
| SHAFFER_II | 76  | 0.32826  | 1.371906 | 0.0375   | 0.131852 | 1 |
| LEE_LIVER_ | 59  | 0.347023 | 1.371346 | 0.070513 | 0.132193 | 1 |
| BROWNE_I   | 39  | 0.377774 | 1.368443 | 0.077686 | 0.134598 | 1 |
| HELLER_HC  | 384 | 0.264333 | 1.367129 | 0.007843 | 0.135661 | 1 |
| BIOCARTA_  | 23  | 0.419616 | 1.366762 | 0.073883 | 0.135847 | 1 |
| LENAOUR_   | 100 | 0.317117 | 1.366537 | 0.037994 | 0.135898 | 1 |
| KEGG_RETI  | 52  | 0.354499 | 1.365436 | 0.063622 | 0.136737 | 1 |
| OUYANG_F   | 18  | 0.452103 | 1.365302 | 0.112676 | 0.136699 | 1 |
| MULLIGHA   | 229 | 0.278555 | 1.364968 | 0.013643 | 0.136855 | 1 |

|            |     |          |          |          |          |   |
|------------|-----|----------|----------|----------|----------|---|
| WILCOX_PI  | 57  | 0.346898 | 1.364162 | 0.078493 | 0.137437 | 1 |
| REACTOME   | 23  | 0.431764 | 1.363603 | 0.08642  | 0.137794 | 1 |
| KEGG_AUT   | 44  | 0.365229 | 1.363523 | 0.081833 | 0.1377   | 1 |
| MARTINEZ_  | 472 | 0.256803 | 1.362234 | 0.001312 | 0.138654 | 1 |
| KEGG_GNR   | 98  | 0.310266 | 1.361721 | 0.040248 | 0.138982 | 1 |
| RICKMAN_   | 83  | 0.32231  | 1.361196 | 0.060748 | 0.13935  | 1 |
| NOJIMA_SF  | 30  | 0.398886 | 1.359391 | 0.095406 | 0.1409   | 1 |
| SCHWAB_T   | 16  | 0.471311 | 1.35915  | 0.12     | 0.14097  | 1 |
| RODRIGUE:  | 33  | 0.392527 | 1.359145 | 0.098639 | 0.140814 | 1 |
| TONKS_TAI  | 51  | 0.354091 | 1.35668  | 0.065217 | 0.142898 | 1 |
| CAIRO_HEF  | 264 | 0.273449 | 1.356431 | 0.016349 | 0.14294  | 1 |
| BOYLAN_M   | 52  | 0.349108 | 1.35599  | 0.066667 | 0.143163 | 1 |
| SCHWAB_T   | 16  | 0.471311 | 1.354658 | 0.120219 | 0.144214 | 1 |
| BOYALT_I   | 15  | 0.467241 | 1.35415  | 0.13369  | 0.14449  | 1 |
| HOLLMAN_   | 249 | 0.275761 | 1.351945 | 0.018414 | 0.146536 | 1 |
| KEGG_NICC  | 24  | 0.412864 | 1.351839 | 0.104895 | 0.146488 | 1 |
| SCIAN_INV  | 28  | 0.398598 | 1.351669 | 0.089655 | 0.146514 | 1 |
| REACTOME   | 61  | 0.337854 | 1.351558 | 0.057234 | 0.146503 | 1 |
| KEGG_INTE  | 42  | 0.364034 | 1.350531 | 0.076547 | 0.147273 | 1 |
| IVANOVA_I  | 125 | 0.294214 | 1.350186 | 0.031437 | 0.147464 | 1 |
| NAKAMUR,   | 40  | 0.364616 | 1.34897  | 0.070724 | 0.148503 | 1 |
| LEE_EARLY  | 42  | 0.365927 | 1.347848 | 0.090047 | 0.149362 | 1 |
| COATES_M   | 68  | 0.328589 | 1.346995 | 0.053659 | 0.150071 | 1 |
| JAATINEN_  | 213 | 0.273485 | 1.346417 | 0.027285 | 0.150458 | 1 |
| WANG_BAI   | 24  | 0.417295 | 1.345839 | 0.096661 | 0.15089  | 1 |
| REACTOME   | 20  | 0.441277 | 1.345535 | 0.110535 | 0.150997 | 1 |
| LIU_BREAS  | 15  | 0.474012 | 1.342761 | 0.12766  | 0.153625 | 1 |
| KIM_WT1_   | 118 | 0.29715  | 1.34264  | 0.039695 | 0.153584 | 1 |
| REACTOME   | 54  | 0.34726  | 1.342477 | 0.069355 | 0.153596 | 1 |
| ST_GRANU   | 25  | 0.409899 | 1.339913 | 0.115385 | 0.155932 | 1 |
| KEGG_ETHI  | 31  | 0.380441 | 1.339251 | 0.110535 | 0.156438 | 1 |
| GARY_CD5   | 447 | 0.255512 | 1.33894  | 0.003797 | 0.156562 | 1 |
| KEGG_END   | 50  | 0.349515 | 1.338559 | 0.078905 | 0.156744 | 1 |
| SATO_SILEI | 45  | 0.353929 | 1.338149 | 0.076539 | 0.156982 | 1 |

|            |     |          |          |          |          |   |
|------------|-----|----------|----------|----------|----------|---|
| NAKAMUR,   | 40  | 0.363778 | 1.337512 | 0.076539 | 0.157465 | 1 |
| SAMOLS_T,  | 57  | 0.338938 | 1.337086 | 0.07815  | 0.157695 | 1 |
| WANG_SM    | 327 | 0.260585 | 1.336611 | 0.01178  | 0.158009 | 1 |
| ROYLANCE_  | 16  | 0.472971 | 1.33582  | 0.119298 | 0.158577 | 1 |
| CROONQUI   | 81  | 0.318785 | 1.335307 | 0.065421 | 0.158916 | 1 |
| THEILGAAR  | 212 | 0.273938 | 1.335291 | 0.02809  | 0.158759 | 1 |
| REACTOME   | 27  | 0.394624 | 1.334995 | 0.100334 | 0.158868 | 1 |
| TSENG_AD   | 26  | 0.400347 | 1.334839 | 0.103873 | 0.158869 | 1 |
| KEGG_GAL   | 25  | 0.410367 | 1.334549 | 0.115385 | 0.158976 | 1 |
| SMID_BRE/  | 134 | 0.289977 | 1.333824 | 0.045524 | 0.159492 | 1 |
| REACTOME   | 29  | 0.399228 | 1.333392 | 0.095318 | 0.159768 | 1 |
| NAKAYAM/   | 78  | 0.316719 | 1.331596 | 0.059011 | 0.161404 | 1 |
| KEGG_NEU   | 126 | 0.294308 | 1.330106 | 0.04142  | 0.16275  | 1 |
| GRABARCZ   | 52  | 0.34024  | 1.329185 | 0.102479 | 0.163479 | 1 |
| SILIGAN_T/ | 15  | 0.468967 | 1.328034 | 0.150808 | 0.16447  | 1 |
| AMIT_EGF_  | 43  | 0.359406 | 1.327452 | 0.095552 | 0.164871 | 1 |
| BIOCARTA_  | 21  | 0.422764 | 1.327166 | 0.123264 | 0.164984 | 1 |
| OSMAN_BI   | 375 | 0.255476 | 1.327122 | 0.009126 | 0.164852 | 1 |
| REACTOME   | 22  | 0.406922 | 1.324831 | 0.107452 | 0.167058 | 1 |
| KYNG_DNA   | 100 | 0.30215  | 1.324535 | 0.056962 | 0.167204 | 1 |
| BIOCARTA_  | 18  | 0.433769 | 1.323929 | 0.116928 | 0.167672 | 1 |
| KEGG_VAS   | 111 | 0.294009 | 1.320842 | 0.054878 | 0.170947 | 1 |
| SHEPARD_I  | 140 | 0.286598 | 1.32031  | 0.046043 | 0.171332 | 1 |
| IVANOVA_I  | 77  | 0.311384 | 1.319477 | 0.072981 | 0.172018 | 1 |
| ST_ADRENI  | 34  | 0.370847 | 1.319195 | 0.112416 | 0.172139 | 1 |
| ABE_VEGF/  | 20  | 0.422941 | 1.318055 | 0.13036  | 0.173212 | 1 |
| DUNNE_TA   | 44  | 0.358029 | 1.316166 | 0.105785 | 0.175146 | 1 |
| CHNG_MU    | 49  | 0.347045 | 1.314745 | 0.111486 | 0.176482 | 1 |
| COULOUAF   | 115 | 0.292573 | 1.314291 | 0.050691 | 0.176794 | 1 |
| BIOCARTA_  | 21  | 0.420273 | 1.314145 | 0.125217 | 0.176783 | 1 |
| TIEN_INTES | 85  | 0.305868 | 1.313716 | 0.076555 | 0.177095 | 1 |
| HOFMANN    | 17  | 0.449029 | 1.312337 | 0.14032  | 0.178434 | 1 |
| SAKAI_CHR  | 78  | 0.310641 | 1.311469 | 0.076246 | 0.179144 | 1 |
| BIOCARTA_  | 22  | 0.418764 | 1.310218 | 0.140138 | 0.180335 | 1 |

|            |     |          |          |          |          |   |
|------------|-----|----------|----------|----------|----------|---|
| SILIGAN_BK | 36  | 0.369127 | 1.309727 | 0.11147  | 0.18071  | 1 |
| HOFMANN    | 35  | 0.369692 | 1.309353 | 0.121795 | 0.180968 | 1 |
| SCHAVOLT_  | 16  | 0.447941 | 1.308329 | 0.134168 | 0.181931 | 1 |
| REACTOME   | 31  | 0.383061 | 1.307547 | 0.122241 | 0.182663 | 1 |
| ACEVEDO_   | 125 | 0.286715 | 1.307484 | 0.049034 | 0.182546 | 1 |
| ZHAN_MUI   | 37  | 0.36037  | 1.307276 | 0.105442 | 0.182591 | 1 |
| TIEN_INTE  | 24  | 0.404733 | 1.307042 | 0.153448 | 0.18265  | 1 |
| CHEN_HOX   | 214 | 0.266208 | 1.306913 | 0.040057 | 0.182616 | 1 |
| HEIDENBLA  | 21  | 0.425209 | 1.306609 | 0.146259 | 0.182741 | 1 |
| TIEN_INTE  | 157 | 0.2787   | 1.305864 | 0.048571 | 0.183419 | 1 |
| PACHER_T/  | 33  | 0.380425 | 1.305058 | 0.131313 | 0.184182 | 1 |
| BIOCARTA_  | 17  | 0.444591 | 1.304975 | 0.119565 | 0.184088 | 1 |
| PROVENZA   | 133 | 0.285953 | 1.304239 | 0.045455 | 0.184708 | 1 |
| MARKEY_R   | 108 | 0.295422 | 1.303819 | 0.066768 | 0.185034 | 1 |
| REACTOME   | 63  | 0.321608 | 1.303757 | 0.086817 | 0.184913 | 1 |
| NING_CHR   | 73  | 0.312933 | 1.303587 | 0.088853 | 0.184919 | 1 |
| REACTOME   | 106 | 0.293018 | 1.303184 | 0.072289 | 0.185188 | 1 |
| WEBER_MI   | 18  | 0.437675 | 1.303108 | 0.147826 | 0.185093 | 1 |
| WEBER_MI   | 22  | 0.40815  | 1.301962 | 0.12709  | 0.186193 | 1 |
| ZHONG_RE   | 176 | 0.273625 | 1.301243 | 0.047076 | 0.186865 | 1 |
| WELCSH_B   | 167 | 0.275324 | 1.300298 | 0.039381 | 0.187722 | 1 |
| REACTOME   | 25  | 0.400397 | 1.300247 | 0.127469 | 0.187595 | 1 |
| MASRI_RES  | 18  | 0.425163 | 1.299264 | 0.129252 | 0.188481 | 1 |
| BREDEMEY   | 53  | 0.337793 | 1.298785 | 0.09164  | 0.188847 | 1 |
| ROY_WOU    | 22  | 0.414697 | 1.297649 | 0.137868 | 0.190026 | 1 |
| RIZKI_TUM  | 186 | 0.27002  | 1.297611 | 0.038516 | 0.189869 | 1 |
| KEGG_GLY   | 75  | 0.304864 | 1.296766 | 0.086751 | 0.190689 | 1 |
| ALCALAY_A  | 138 | 0.282501 | 1.296589 | 0.051908 | 0.190699 | 1 |
| ST_T_CELL  | 42  | 0.349861 | 1.296496 | 0.121163 | 0.190611 | 1 |
| REACTOME   | 68  | 0.319656 | 1.296411 | 0.092767 | 0.190514 | 1 |
| SENESE_HC  | 235 | 0.262943 | 1.296369 | 0.034384 | 0.190377 | 1 |
| ZHAN_MUI   | 79  | 0.306471 | 1.295961 | 0.09539  | 0.190621 | 1 |
| KEGG_NON   | 52  | 0.333388 | 1.295484 | 0.101329 | 0.190949 | 1 |
| MACLACHL   | 17  | 0.439642 | 1.294264 | 0.148973 | 0.192193 | 1 |

|            |     |          |          |          |          |   |
|------------|-----|----------|----------|----------|----------|---|
| BIOCARTA_  | 36  | 0.366731 | 1.293905 | 0.129693 | 0.192407 | 1 |
| BIOCARTA_  | 15  | 0.441371 | 1.292865 | 0.152015 | 0.193404 | 1 |
| AMUNDSO    | 17  | 0.431356 | 1.292643 | 0.149091 | 0.193447 | 1 |
| HOFFMANI   | 36  | 0.359259 | 1.291415 | 0.133672 | 0.194703 | 1 |
| LINDGREN_  | 114 | 0.290087 | 1.291357 | 0.051128 | 0.194578 | 1 |
| IWANAGA_   | 296 | 0.255609 | 1.28993  | 0.020979 | 0.196109 | 1 |
| REACTOME   | 15  | 0.449433 | 1.289692 | 0.141623 | 0.19619  | 1 |
| GINESTIER_ | 64  | 0.316392 | 1.289565 | 0.099844 | 0.196153 | 1 |
| BIOCARTA_  | 22  | 0.402204 | 1.288906 | 0.137391 | 0.196701 | 1 |
| REACTOME   | 16  | 0.437786 | 1.286208 | 0.158645 | 0.199804 | 1 |
| FAELT_B_C  | 47  | 0.334535 | 1.286023 | 0.115    | 0.199823 | 1 |
| HOOI_ST7_  | 104 | 0.294011 | 1.285478 | 0.069124 | 0.200301 | 1 |
| WANG_CLI   | 164 | 0.271114 | 1.284491 | 0.054572 | 0.201342 | 1 |
| REACTOME   | 25  | 0.389321 | 1.284432 | 0.158163 | 0.201212 | 1 |
| REACTOME   | 126 | 0.284841 | 1.284342 | 0.07571  | 0.201119 | 1 |
| URS_ADIPC  | 30  | 0.374194 | 1.284309 | 0.154839 | 0.20096  | 1 |
| HOSHIDA_I  | 52  | 0.332875 | 1.284302 | 0.1198   | 0.20077  | 1 |
| BIOCARTA_  | 25  | 0.384761 | 1.283811 | 0.136602 | 0.201193 | 1 |
| PARENT_M   | 43  | 0.348961 | 1.283371 | 0.11794  | 0.201565 | 1 |
| ZHAN_MUI   | 44  | 0.344671 | 1.283273 | 0.104132 | 0.201467 | 1 |
| TAVAZOIE_  | 100 | 0.292215 | 1.282244 | 0.078195 | 0.202494 | 1 |
| KEGG_ALLC  | 31  | 0.371032 | 1.282036 | 0.142857 | 0.202537 | 1 |
| SATO_SILEI | 46  | 0.336684 | 1.281882 | 0.136364 | 0.202536 | 1 |
| BROWNE_I   | 98  | 0.293011 | 1.281618 | 0.091047 | 0.202673 | 1 |
| IVANOVA_I  | 95  | 0.298245 | 1.28106  | 0.095238 | 0.203171 | 1 |
| DEURIG_T_  | 346 | 0.250304 | 1.28055  | 0.020548 | 0.203616 | 1 |
| REACTOME   | 222 | 0.261821 | 1.280079 | 0.04578  | 0.204017 | 1 |
| BIOCARTA_  | 22  | 0.397482 | 1.280068 | 0.16129  | 0.203827 | 1 |
| ABRAHAM_   | 18  | 0.425354 | 1.279442 | 0.161512 | 0.20443  | 1 |
| NADERI_BF  | 17  | 0.43491  | 1.278618 | 0.14795  | 0.205245 | 1 |
| RICKMAN_   | 44  | 0.343652 | 1.2784   | 0.115843 | 0.205345 | 1 |
| SWEET_KR,  | 43  | 0.339284 | 1.278355 | 0.133443 | 0.205206 | 1 |
| RODWELL_   | 103 | 0.290933 | 1.278218 | 0.082111 | 0.205169 | 1 |
| KEGG_ANT   | 74  | 0.306542 | 1.278175 | 0.099349 | 0.205013 | 1 |

|            |     |          |          |          |          |   |
|------------|-----|----------|----------|----------|----------|---|
| LIEN_BREA  | 107 | 0.287435 | 1.275159 | 0.076443 | 0.208671 | 1 |
| REACTOME   | 167 | 0.269718 | 1.274189 | 0.062222 | 0.209676 | 1 |
| SMID_BRE/  | 21  | 0.401375 | 1.274025 | 0.15544  | 0.2097   | 1 |
| PASQUALU   | 143 | 0.280302 | 1.27395  | 0.074671 | 0.20957  | 1 |
| KEGG_TIGF  | 131 | 0.280061 | 1.273698 | 0.070149 | 0.209703 | 1 |
| SMID_BRE/  | 38  | 0.346455 | 1.273169 | 0.133013 | 0.21023  | 1 |
| DAZARD_R   | 255 | 0.256426 | 1.273158 | 0.041551 | 0.210036 | 1 |
| VALK_AML   | 31  | 0.366223 | 1.272773 | 0.158756 | 0.210386 | 1 |
| BYSTRYKH_  | 115 | 0.285247 | 1.272665 | 0.077037 | 0.210309 | 1 |
| NIKOLSKY_  | 20  | 0.414659 | 1.272534 | 0.176776 | 0.210248 | 1 |
| BIOCARTA_  | 84  | 0.296491 | 1.27253  | 0.110606 | 0.210047 | 1 |
| LANDIS_BR  | 41  | 0.344872 | 1.272282 | 0.140962 | 0.210139 | 1 |
| BREDEMEY   | 44  | 0.337473 | 1.272159 | 0.133556 | 0.210097 | 1 |
| KAAB_FAIL  | 138 | 0.273535 | 1.271342 | 0.073463 | 0.210924 | 1 |
| VARELA_ZM  | 36  | 0.351558 | 1.271112 | 0.146597 | 0.211005 | 1 |
| KEGG_TGF_  | 84  | 0.300748 | 1.270954 | 0.105344 | 0.211015 | 1 |
| WAMUNYC    | 128 | 0.281621 | 1.270005 | 0.069486 | 0.212015 | 1 |
| WEIGEL_O:  | 30  | 0.382922 | 1.269429 | 0.152941 | 0.212535 | 1 |
| WATANABI   | 86  | 0.300849 | 1.268331 | 0.099057 | 0.213759 | 1 |
| WEIGEL_O:  | 35  | 0.358504 | 1.267382 | 0.127419 | 0.214787 | 1 |
| GENTILE_U  | 28  | 0.378339 | 1.267263 | 0.144538 | 0.214725 | 1 |
| KERLEY_RE  | 39  | 0.349236 | 1.267105 | 0.151771 | 0.214684 | 1 |
| WILLERT_V  | 17  | 0.438729 | 1.266298 | 0.191489 | 0.215502 | 1 |
| VALK_AML   | 29  | 0.372162 | 1.266222 | 0.167488 | 0.215382 | 1 |
| POTTI_CYT  | 32  | 0.36211  | 1.265336 | 0.159734 | 0.216335 | 1 |
| DELYS_THY  | 209 | 0.260193 | 1.265278 | 0.042735 | 0.216224 | 1 |
| KAYO_CALC  | 69  | 0.308619 | 1.264251 | 0.098131 | 0.217402 | 1 |
| JAZAG_TGF  | 63  | 0.315476 | 1.263144 | 0.124161 | 0.218583 | 1 |
| FALVELLA_: | 63  | 0.315535 | 1.263018 | 0.121951 | 0.218527 | 1 |
| REACTOME   | 15  | 0.439153 | 1.262542 | 0.16179  | 0.218978 | 1 |
| BIOCARTA_  | 25  | 0.384035 | 1.262031 | 0.157439 | 0.219461 | 1 |
| CORRE_ML   | 59  | 0.312156 | 1.259878 | 0.118616 | 0.222105 | 1 |
| REACTOME   | 27  | 0.37618  | 1.258096 | 0.165247 | 0.224248 | 1 |
| OSMAN_BI   | 360 | 0.244164 | 1.25791  | 0.028683 | 0.224284 | 1 |

|            |     |          |          |          |          |   |
|------------|-----|----------|----------|----------|----------|---|
| SMID_BRE/  | 84  | 0.29601  | 1.25784  | 0.107477 | 0.224163 | 1 |
| RASHI_RES  | 130 | 0.275254 | 1.257623 | 0.089666 | 0.224217 | 1 |
| WAGNER_/   | 23  | 0.399145 | 1.256513 | 0.156928 | 0.225539 | 1 |
| BIOCARTA_  | 35  | 0.351571 | 1.256471 | 0.1504   | 0.225371 | 1 |
| GENTILE_U  | 17  | 0.425677 | 1.256126 | 0.18887  | 0.225641 | 1 |
| LEE_LIVER_ | 50  | 0.325239 | 1.256124 | 0.136725 | 0.22543  | 1 |
| SEMENZA_   | 33  | 0.360304 | 1.255221 | 0.152824 | 0.226387 | 1 |
| CHANG_PC   | 15  | 0.437118 | 1.255043 | 0.17094  | 0.226408 | 1 |
| SHEPARD_(  | 139 | 0.271138 | 1.254419 | 0.079755 | 0.227073 | 1 |
| NAGASHIM   | 52  | 0.325462 | 1.252244 | 0.129485 | 0.229717 | 1 |
| MURAKAM    | 28  | 0.371146 | 1.252127 | 0.137521 | 0.229666 | 1 |
| MARKS_HC   | 20  | 0.404251 | 1.251522 | 0.181973 | 0.230258 | 1 |
| TURASHVIL  | 59  | 0.317619 | 1.25149  | 0.136585 | 0.230086 | 1 |
| SASAKI_AD  | 136 | 0.271783 | 1.251211 | 0.078056 | 0.230229 | 1 |
| MULLIGHA   | 367 | 0.241963 | 1.251187 | 0.032215 | 0.230042 | 1 |
| BROWNE_†   | 56  | 0.319438 | 1.251052 | 0.131229 | 0.230002 | 1 |
| GALE_APL_  | 17  | 0.423368 | 1.251048 | 0.178634 | 0.229792 | 1 |
| VALK_AML   | 21  | 0.39691  | 1.249937 | 0.169408 | 0.231059 | 1 |
| WALLACE_]  | 75  | 0.301296 | 1.249479 | 0.118196 | 0.231491 | 1 |
| BIOCARTA_  | 26  | 0.373018 | 1.248708 | 0.170284 | 0.232343 | 1 |
| AMUNDSO    | 16  | 0.419179 | 1.248215 | 0.178571 | 0.232812 | 1 |
| ENK_UV_R   | 469 | 0.234915 | 1.247996 | 0.026786 | 0.232879 | 1 |
| WNT_SIGN   | 87  | 0.295468 | 1.247401 | 0.114332 | 0.233483 | 1 |
| MCBRYAN_   | 171 | 0.26336  | 1.246402 | 0.069869 | 0.234686 | 1 |
| WU_HBX_†   | 16  | 0.424874 | 1.245809 | 0.19469  | 0.23528  | 1 |
| MOREAUX_   | 354 | 0.242614 | 1.245735 | 0.040897 | 0.23516  | 1 |
| LI_AMPLIFI | 160 | 0.265448 | 1.245332 | 0.087209 | 0.235481 | 1 |
| STEIN_ESRI | 101 | 0.285085 | 1.24503  | 0.106481 | 0.235671 | 1 |
| WEBER_MI   | 30  | 0.371688 | 1.244661 | 0.158261 | 0.235989 | 1 |
| ASTON_M/   | 152 | 0.270567 | 1.244579 | 0.079595 | 0.235885 | 1 |
| REACTOME   | 85  | 0.292232 | 1.241918 | 0.118902 | 0.23942  | 1 |
| GENTILE_U  | 17  | 0.425677 | 1.240867 | 0.191756 | 0.24068  | 1 |
| RODWELL_   | 118 | 0.275551 | 1.240835 | 0.098485 | 0.240497 | 1 |
| CHIARETTI_ | 65  | 0.305711 | 1.239806 | 0.14003  | 0.24171  | 1 |



|            |     |          |          |          |          |   |
|------------|-----|----------|----------|----------|----------|---|
| TURASHVIL  | 43  | 0.337078 | 1.239729 | 0.143351 | 0.241585 | 1 |
| IIZUKA_LIV | 23  | 0.379879 | 1.238712 | 0.193772 | 0.242784 | 1 |
| COLIN_PILC | 34  | 0.351106 | 1.23841  | 0.158348 | 0.243043 | 1 |
| ROSS_ACU   | 79  | 0.296528 | 1.237755 | 0.136    | 0.243709 | 1 |
| YAO_TEMP   | 74  | 0.296921 | 1.237168 | 0.127925 | 0.244299 | 1 |
| MORI_PLA   | 36  | 0.347797 | 1.236972 | 0.152397 | 0.244373 | 1 |
| BONOME_I   | 30  | 0.356154 | 1.236831 | 0.183391 | 0.244337 | 1 |
| CHIANG_LI  | 151 | 0.264295 | 1.236346 | 0.091317 | 0.244795 | 1 |
| DAZARD_U   | 37  | 0.348019 | 1.235737 | 0.169872 | 0.245454 | 1 |
| REACTOME   | 15  | 0.429967 | 1.234929 | 0.217153 | 0.246309 | 1 |
| KEGG_B_CI  | 75  | 0.298997 | 1.233811 | 0.123867 | 0.247665 | 1 |
| SAKAI_TUN  | 27  | 0.366394 | 1.233538 | 0.178808 | 0.247846 | 1 |
| MARTORIA   | 88  | 0.286924 | 1.233373 | 0.124807 | 0.24786  | 1 |
| STEARMAN   | 54  | 0.318772 | 1.233344 | 0.168285 | 0.24768  | 1 |
| BERENJENC  | 18  | 0.415245 | 1.232699 | 0.196396 | 0.248357 | 1 |
| BROWNE_I   | 211 | 0.251561 | 1.231886 | 0.078014 | 0.249288 | 1 |
| REACTOME   | 93  | 0.280941 | 1.229745 | 0.138249 | 0.252196 | 1 |
| TCGA_GLIC  | 67  | 0.304805 | 1.229572 | 0.146774 | 0.252214 | 1 |
| KEGG_PPA   | 67  | 0.304013 | 1.228969 | 0.147152 | 0.252824 | 1 |
| ZHANG_PR   | 47  | 0.324989 | 1.228123 | 0.161859 | 0.253886 | 1 |
| WEST_ADR   | 20  | 0.394882 | 1.228026 | 0.210526 | 0.253794 | 1 |
| REACTOME   | 48  | 0.31898  | 1.227445 | 0.151858 | 0.254463 | 1 |
| VANTVEER   | 44  | 0.327412 | 1.227271 | 0.169967 | 0.254475 | 1 |
| KEGG_UBIC  | 133 | 0.268125 | 1.226197 | 0.118421 | 0.255787 | 1 |
| NAKAMUR    | 21  | 0.39541  | 1.22489  | 0.210069 | 0.257524 | 1 |
| REACTOME   | 16  | 0.415664 | 1.224869 | 0.204319 | 0.257333 | 1 |
| KEGG_MAF   | 263 | 0.246405 | 1.22463  | 0.07619  | 0.257463 | 1 |
| YOSHIOKA   | 54  | 0.312191 | 1.224198 | 0.145455 | 0.257899 | 1 |
| KEGG_CAL   | 175 | 0.25834  | 1.224042 | 0.082517 | 0.25789  | 1 |
| ACEVEDO    | 265 | 0.243998 | 1.223826 | 0.077029 | 0.257992 | 1 |
| CREIGHTON  | 283 | 0.242436 | 1.223786 | 0.067476 | 0.257835 | 1 |
| HAHTOLA    | 37  | 0.344501 | 1.223439 | 0.183775 | 0.258148 | 1 |
| BIOCARTA   | 24  | 0.379305 | 1.22281  | 0.207705 | 0.25881  | 1 |
| KEGG_NEU   | 262 | 0.246041 | 1.222737 | 0.065129 | 0.258717 | 1 |

|           |     |          |          |          |          |   |
|-----------|-----|----------|----------|----------|----------|---|
| KEGG_LEUI | 115 | 0.271818 | 1.222624 | 0.13099  | 0.258644 | 1 |
| KEGG_PRO  | 85  | 0.288099 | 1.222319 | 0.1264   | 0.258879 | 1 |
| MCCABE_H  | 29  | 0.362722 | 1.221193 | 0.190317 | 0.260356 | 1 |
| VALK_AML  | 25  | 0.370779 | 1.220546 | 0.210351 | 0.261071 | 1 |
| ZIRN_TRET | 18  | 0.412346 | 1.220323 | 0.189853 | 0.261199 | 1 |
| BIOCARTA_ | 16  | 0.419529 | 1.220259 | 0.206349 | 0.261059 | 1 |
| BECKER_TA | 48  | 0.321549 | 1.220067 | 0.16748  | 0.261107 | 1 |
| TURASHVIL | 20  | 0.386283 | 1.219249 | 0.21466  | 0.262045 | 1 |
| GARGALOV  | 33  | 0.341058 | 1.21909  | 0.186869 | 0.262076 | 1 |
| CAMPS_CC  | 54  | 0.31097  | 1.218618 | 0.13245  | 0.262543 | 1 |
| BARRIER_C | 42  | 0.324867 | 1.217474 | 0.163934 | 0.264047 | 1 |
| REACTOME  | 30  | 0.358146 | 1.216872 | 0.217755 | 0.264715 | 1 |
| BREUHAHN  | 15  | 0.425334 | 1.216731 | 0.22813  | 0.264685 | 1 |
| BIOCARTA_ | 15  | 0.429381 | 1.216671 | 0.212174 | 0.264553 | 1 |
| MULLIGHA  | 399 | 0.234267 | 1.215808 | 0.051348 | 0.265649 | 1 |
| LUND_SILE | 16  | 0.415579 | 1.215674 | 0.208621 | 0.265631 | 1 |
| REACTOME  | 22  | 0.396221 | 1.215382 | 0.19573  | 0.265815 | 1 |
| VALK_AML  | 33  | 0.341954 | 1.214716 | 0.192053 | 0.266615 | 1 |
| KEGG_MEL  | 100 | 0.276289 | 1.213762 | 0.122449 | 0.267863 | 1 |
| MOREAUX_  | 69  | 0.299747 | 1.21376  | 0.160256 | 0.267628 | 1 |
| XU_CREBBI | 37  | 0.336672 | 1.213658 | 0.183007 | 0.267533 | 1 |
| BIOCARTA_ | 23  | 0.373805 | 1.213391 | 0.205782 | 0.267706 | 1 |
| LANDIS_ER | 15  | 0.421168 | 1.212778 | 0.214162 | 0.268404 | 1 |
| TONKS_TAI | 15  | 0.42943  | 1.212149 | 0.206093 | 0.269129 | 1 |
| BIOCARTA_ | 21  | 0.384779 | 1.210636 | 0.210145 | 0.271238 | 1 |
| KEGG_P53_ | 67  | 0.297576 | 1.210394 | 0.15949  | 0.27134  | 1 |
| ALONSO_M  | 16  | 0.421201 | 1.210153 | 0.215986 | 0.271463 | 1 |
| KEGG_LINC | 26  | 0.364126 | 1.209998 | 0.191489 | 0.271443 | 1 |
| TURASHVIL | 69  | 0.290976 | 1.20937  | 0.165605 | 0.272178 | 1 |
| CADWELL_  | 55  | 0.309066 | 1.208893 | 0.175896 | 0.272648 | 1 |
| BIOCARTA_ | 18  | 0.405764 | 1.208032 | 0.229642 | 0.27371  | 1 |
| BIOCARTA_ | 17  | 0.406421 | 1.207666 | 0.218472 | 0.274002 | 1 |
| BIOCARTA_ | 32  | 0.339968 | 1.206486 | 0.22164  | 0.275621 | 1 |
| HAMAI_AP  | 327 | 0.235734 | 1.205837 | 0.079195 | 0.276355 | 1 |

|            |     |          |          |          |          |   |
|------------|-----|----------|----------|----------|----------|---|
| MCCABE_H   | 20  | 0.388733 | 1.205605 | 0.20742  | 0.276479 | 1 |
| ALCALA_AF  | 86  | 0.279913 | 1.205004 | 0.141966 | 0.277155 | 1 |
| LOPES_ME   | 22  | 0.383976 | 1.203224 | 0.233857 | 0.279628 | 1 |
| BIOCARTA_  | 16  | 0.410399 | 1.20305  | 0.219799 | 0.279676 | 1 |
| MULLIGHA   | 158 | 0.258343 | 1.202661 | 0.10847  | 0.280062 | 1 |
| SETLUR_PR  | 59  | 0.30712  | 1.201218 | 0.186885 | 0.282093 | 1 |
| HSIAO_HOI  | 374 | 0.232403 | 1.200377 | 0.069987 | 0.283188 | 1 |
| HSIAO_LIVI | 230 | 0.243211 | 1.199386 | 0.105339 | 0.28448  | 1 |
| REACTOME   | 35  | 0.339244 | 1.198563 | 0.196891 | 0.285555 | 1 |
| BIOCARTA_  | 56  | 0.305462 | 1.196797 | 0.190779 | 0.288038 | 1 |
| IVANOVA_I  | 199 | 0.248701 | 1.196301 | 0.117733 | 0.288587 | 1 |
| KEGG_HED   | 56  | 0.297577 | 1.19533  | 0.180272 | 0.289869 | 1 |
| MULLIGHA   | 268 | 0.239291 | 1.19526  | 0.11236  | 0.289708 | 1 |
| MMS_MOL    | 32  | 0.340129 | 1.195193 | 0.198165 | 0.289551 | 1 |
| FONTAINE_  | 62  | 0.29908  | 1.193232 | 0.179775 | 0.292473 | 1 |
| KLEIN_TAR  | 31  | 0.346452 | 1.1902   | 0.219835 | 0.297164 | 1 |
| MARTORIA   | 96  | 0.271181 | 1.189781 | 0.161919 | 0.297577 | 1 |
| CREIGHTON  | 492 | 0.223965 | 1.189704 | 0.060226 | 0.297473 | 1 |
| REACTOME   | 47  | 0.318305 | 1.189397 | 0.191987 | 0.297736 | 1 |
| REACTOME   | 44  | 0.320052 | 1.189308 | 0.2      | 0.297626 | 1 |
| ICHIBA_GR  | 39  | 0.324418 | 1.188441 | 0.217317 | 0.298828 | 1 |
| CLIMENT_E  | 21  | 0.383745 | 1.18825  | 0.242321 | 0.298891 | 1 |
| DAZARD_R   | 93  | 0.273853 | 1.188014 | 0.168254 | 0.299012 | 1 |
| RAMALHO_   | 68  | 0.293111 | 1.186687 | 0.180354 | 0.300892 | 1 |
| SWEET_KR   | 25  | 0.366854 | 1.184856 | 0.22877  | 0.303587 | 1 |
| ZHAN_MUI   | 43  | 0.317495 | 1.184596 | 0.212903 | 0.303726 | 1 |
| GARGALOV   | 27  | 0.355944 | 1.183837 | 0.23127  | 0.304706 | 1 |
| BORCZUK_   | 95  | 0.272003 | 1.182083 | 0.173776 | 0.307329 | 1 |
| WOO_LIVE   | 80  | 0.277814 | 1.181271 | 0.171157 | 0.308393 | 1 |
| WANG_BAI   | 43  | 0.316069 | 1.181191 | 0.204319 | 0.308265 | 1 |
| MORI_LARI  | 44  | 0.318048 | 1.18083  | 0.207237 | 0.308612 | 1 |
| PEPPER_CF  | 20  | 0.389014 | 1.18023  | 0.247878 | 0.309362 | 1 |
| BIOCARTA_  | 15  | 0.413818 | 1.180093 | 0.254516 | 0.309326 | 1 |
| HAHTOLA_   | 95  | 0.269556 | 1.180064 | 0.165152 | 0.309121 | 1 |

|           |     |          |          |          |          |   |
|-----------|-----|----------|----------|----------|----------|---|
| KEGG_ALDI | 41  | 0.321262 | 1.179785 | 0.231419 | 0.309312 | 1 |
| KEGG_TYPI | 36  | 0.324772 | 1.1797   | 0.222756 | 0.309199 | 1 |
| CHARAFE_I | 429 | 0.224277 | 1.177431 | 0.086957 | 0.312598 | 1 |
| REACTOME  | 18  | 0.390747 | 1.176632 | 0.25945  | 0.313671 | 1 |
| DOANE_BR  | 107 | 0.265147 | 1.1765   | 0.155864 | 0.313638 | 1 |
| YANG_BRE  | 18  | 0.386619 | 1.175347 | 0.231579 | 0.315318 | 1 |
| MCCABE_B  | 428 | 0.226422 | 1.175064 | 0.089494 | 0.315553 | 1 |
| MARCHINI  | 19  | 0.38095  | 1.174646 | 0.238261 | 0.315994 | 1 |
| BOYALT_I  | 39  | 0.326434 | 1.173994 | 0.23339  | 0.316844 | 1 |
| REACTOME  | 30  | 0.348318 | 1.173806 | 0.247892 | 0.316922 | 1 |
| BIOCARTA  | 24  | 0.359337 | 1.172543 | 0.236975 | 0.318758 | 1 |
| BOYALT_I  | 61  | 0.294664 | 1.172169 | 0.193603 | 0.319193 | 1 |
| BIOCARTA  | 18  | 0.393101 | 1.171492 | 0.246504 | 0.32007  | 1 |
| CHEN_HOX  | 41  | 0.318373 | 1.171036 | 0.232323 | 0.320617 | 1 |
| WILENSKY  | 24  | 0.362423 | 1.170551 | 0.24055  | 0.321224 | 1 |
| BIDUS_ME  | 147 | 0.25125  | 1.170159 | 0.167155 | 0.321643 | 1 |
| KEGG_ASTI | 25  | 0.349727 | 1.169939 | 0.224779 | 0.321743 | 1 |
| BIOCARTA  | 20  | 0.37708  | 1.168441 | 0.251318 | 0.324062 | 1 |
| SOTIRIOU  | 46  | 0.310101 | 1.166649 | 0.227273 | 0.326812 | 1 |
| KEGG_DRU  | 42  | 0.316496 | 1.166557 | 0.230132 | 0.326701 | 1 |
| WIKMAN_I  | 27  | 0.344819 | 1.166134 | 0.248276 | 0.327137 | 1 |
| RUIZ_TNC  | 137 | 0.252748 | 1.164051 | 0.171254 | 0.330428 | 1 |
| ZHU_CMV   | 41  | 0.3179   | 1.16278  | 0.243902 | 0.332342 | 1 |
| CROONQUI  | 33  | 0.335364 | 1.16244  | 0.257191 | 0.33267  | 1 |
| KEGG_GLYC | 15  | 0.402632 | 1.161217 | 0.252747 | 0.334593 | 1 |
| IWANAGA   | 144 | 0.249839 | 1.160891 | 0.185552 | 0.334888 | 1 |
| KEGG_SPHI | 38  | 0.323147 | 1.160823 | 0.231579 | 0.334726 | 1 |
| VALK_AML  | 35  | 0.321659 | 1.160584 | 0.255    | 0.334887 | 1 |
| KEGG_GLYC | 21  | 0.375822 | 1.159763 | 0.25394  | 0.336057 | 1 |
| HAMAI_AP  | 123 | 0.254083 | 1.159571 | 0.176119 | 0.336124 | 1 |
| GRUETZMA  | 192 | 0.241788 | 1.159056 | 0.158114 | 0.336797 | 1 |
| AKL_HTLV1 | 27  | 0.347585 | 1.159049 | 0.253521 | 0.336534 | 1 |
| POOLA_INV | 273 | 0.230943 | 1.15891  | 0.13764  | 0.336491 | 1 |
| DITTMER_F | 71  | 0.280458 | 1.158867 | 0.216529 | 0.336285 | 1 |

|            |     |          |          |          |          |   |
|------------|-----|----------|----------|----------|----------|---|
| KONDO_PF   | 194 | 0.24048  | 1.158682 | 0.16309  | 0.336311 | 1 |
| MISHRA_C   | 21  | 0.370948 | 1.158132 | 0.273535 | 0.337017 | 1 |
| WU_HBX_1   | 15  | 0.404419 | 1.158042 | 0.261905 | 0.33691  | 1 |
| STEIN_ESRI | 29  | 0.347136 | 1.157256 | 0.256623 | 0.338084 | 1 |
| KEGG_LON   | 67  | 0.281874 | 1.157185 | 0.221509 | 0.337919 | 1 |
| LANDEMAI   | 21  | 0.367442 | 1.156971 | 0.264055 | 0.338043 | 1 |
| OHM_MET    | 26  | 0.350539 | 1.156739 | 0.259631 | 0.338184 | 1 |
| CHIANG_LI  | 61  | 0.290058 | 1.156453 | 0.222756 | 0.338398 | 1 |
| JAZAG_TGF  | 102 | 0.261016 | 1.15587  | 0.202552 | 0.339157 | 1 |
| KEGG_GLYC  | 15  | 0.409174 | 1.155423 | 0.285714 | 0.339699 | 1 |
| REACTOME   | 120 | 0.259281 | 1.155418 | 0.169565 | 0.339436 | 1 |
| LI_LUNG_C  | 41  | 0.311152 | 1.153034 | 0.245315 | 0.343419 | 1 |
| BROWNE_I   | 173 | 0.243661 | 1.152784 | 0.174487 | 0.343588 | 1 |
| ZHAN_MUI   | 41  | 0.310464 | 1.150968 | 0.263339 | 0.346677 | 1 |
| OUYANG_F   | 19  | 0.373767 | 1.150811 | 0.296501 | 0.346674 | 1 |
| KOYAMA_S   | 291 | 0.227477 | 1.149814 | 0.137283 | 0.348219 | 1 |
| DAIRKEE_C  | 25  | 0.341962 | 1.149464 | 0.258865 | 0.348567 | 1 |
| TAYLOR_M   | 62  | 0.284094 | 1.149246 | 0.238562 | 0.348691 | 1 |
| LEE_LIVER_ | 60  | 0.288791 | 1.149078 | 0.236395 | 0.348723 | 1 |
| MORI_SMA   | 60  | 0.283855 | 1.149032 | 0.231125 | 0.348536 | 1 |
| SHIPP_DLB  | 43  | 0.303666 | 1.14889  | 0.239617 | 0.348497 | 1 |
| BROWNE_I   | 44  | 0.30749  | 1.148176 | 0.242928 | 0.349513 | 1 |
| BREDEMEY   | 53  | 0.298438 | 1.144586 | 0.240204 | 0.355682 | 1 |
| ROZANOV_   | 35  | 0.324397 | 1.144444 | 0.262458 | 0.355645 | 1 |
| ST_GA13_F  | 35  | 0.321732 | 1.144154 | 0.259322 | 0.355877 | 1 |
| ST_ERK1_E  | 29  | 0.336144 | 1.14319  | 0.267559 | 0.357422 | 1 |
| LUI_THYRO  | 41  | 0.310177 | 1.142373 | 0.255354 | 0.358588 | 1 |
| KEGG_T_CI  | 106 | 0.258644 | 1.141189 | 0.203733 | 0.360519 | 1 |
| BIOCARTA_  | 38  | 0.311897 | 1.140598 | 0.280919 | 0.361286 | 1 |
| GARGALOV   | 29  | 0.339791 | 1.14003  | 0.271758 | 0.362007 | 1 |
| CHOI_ATL_  | 15  | 0.404286 | 1.13976  | 0.297872 | 0.362244 | 1 |
| MUNSHI_M   | 54  | 0.294435 | 1.138184 | 0.2608   | 0.364889 | 1 |
| DAVICIONI  | 67  | 0.281807 | 1.137744 | 0.259504 | 0.365436 | 1 |
| HELLER_HC  | 261 | 0.228499 | 1.136146 | 0.181189 | 0.368074 | 1 |

|           |     |          |          |          |          |   |
|-----------|-----|----------|----------|----------|----------|---|
| DIRMEIER_ | 23  | 0.352808 | 1.13345  | 0.281619 | 0.372969 | 1 |
| ABRAHAM_  | 23  | 0.360839 | 1.132769 | 0.295    | 0.373944 | 1 |
| KEGG_RIG_ | 70  | 0.278996 | 1.132193 | 0.239683 | 0.374749 | 1 |
| BIOCARTA_ | 24  | 0.354164 | 1.131758 | 0.290941 | 0.375264 | 1 |
| SCHEIDERE | 24  | 0.349271 | 1.131691 | 0.284722 | 0.375112 | 1 |
| DITTMER_F | 108 | 0.253489 | 1.131367 | 0.230159 | 0.375445 | 1 |
| FONTAINE_ | 68  | 0.277011 | 1.13085  | 0.254747 | 0.376136 | 1 |
| REACTOME  | 53  | 0.289576 | 1.12857  | 0.269044 | 0.380151 | 1 |
| FLECHNER_ | 62  | 0.279031 | 1.128452 | 0.256866 | 0.380095 | 1 |
| ALONSO_M  | 22  | 0.349261 | 1.128017 | 0.305115 | 0.380622 | 1 |
| YAGI_AML_ | 334 | 0.219916 | 1.127786 | 0.179521 | 0.380782 | 1 |
| GRESHOCK  | 325 | 0.219802 | 1.127631 | 0.170799 | 0.380752 | 1 |
| BIOCARTA_ | 17  | 0.377776 | 1.127608 | 0.30648  | 0.380508 | 1 |
| FERREIRA_ | 87  | 0.26125  | 1.127413 | 0.252322 | 0.380586 | 1 |
| NIKOLSKY_ | 151 | 0.243147 | 1.127307 | 0.217968 | 0.380523 | 1 |
| BROWNE_   | 143 | 0.245562 | 1.127122 | 0.210123 | 0.380603 | 1 |
| NOUZOVA_  | 58  | 0.286593 | 1.126358 | 0.268371 | 0.381808 | 1 |
| OUILLETTE | 54  | 0.29251  | 1.124604 | 0.27787  | 0.384867 | 1 |
| BIOCARTA_ | 38  | 0.313073 | 1.123982 | 0.281034 | 0.385766 | 1 |
| ZHAN_MUI  | 61  | 0.284645 | 1.123338 | 0.2768   | 0.38671  | 1 |
| NATSUME_  | 68  | 0.274289 | 1.122893 | 0.270764 | 0.387251 | 1 |
| BENPORAT  | 99  | 0.259457 | 1.122695 | 0.239437 | 0.387294 | 1 |
| KANNAN_T  | 16  | 0.384623 | 1.121848 | 0.308797 | 0.388658 | 1 |
| ZHOU_INFI | 355 | 0.216363 | 1.120954 | 0.166013 | 0.390136 | 1 |
| REACTOME  | 149 | 0.241489 | 1.120846 | 0.22017  | 0.390014 | 1 |
| BOYALT_I  | 51  | 0.289367 | 1.120812 | 0.279365 | 0.389774 | 1 |
| KEGG_WN   | 149 | 0.243501 | 1.120616 | 0.22006  | 0.389863 | 1 |
| BILD_MYC_ | 188 | 0.235678 | 1.11839  | 0.223547 | 0.393898 | 1 |
| SU_PLACEN | 24  | 0.344002 | 1.118245 | 0.299833 | 0.393857 | 1 |
| VALK_AML_ | 33  | 0.316311 | 1.117847 | 0.286195 | 0.394278 | 1 |
| GAZDA_DI/ | 444 | 0.214467 | 1.117404 | 0.177097 | 0.394817 | 1 |
| CADWELL_  | 82  | 0.26446  | 1.116064 | 0.274143 | 0.397194 | 1 |
| STREICHER | 40  | 0.306055 | 1.115833 | 0.291246 | 0.397347 | 1 |
| SA_TRKA_F | 15  | 0.388641 | 1.11511  | 0.304196 | 0.398456 | 1 |

|            |     |          |          |          |          |   |
|------------|-----|----------|----------|----------|----------|---|
| MCCLUNG_   | 88  | 0.259906 | 1.114659 | 0.258114 | 0.399016 | 1 |
| WANG_LM    | 326 | 0.217442 | 1.113855 | 0.195739 | 0.400265 | 1 |
| HOFMANN    | 41  | 0.301968 | 1.113611 | 0.293515 | 0.400425 | 1 |
| DACOSTA_   | 75  | 0.270066 | 1.11357  | 0.276899 | 0.400202 | 1 |
| WAMUNYC    | 60  | 0.277423 | 1.113185 | 0.274351 | 0.400653 | 1 |
| FONTAINE_  | 63  | 0.27376  | 1.113007 | 0.259084 | 0.400702 | 1 |
| REACTOME   | 208 | 0.226338 | 1.112959 | 0.220461 | 0.400474 | 1 |
| LU_TUMOF   | 25  | 0.347005 | 1.112456 | 0.321492 | 0.401179 | 1 |
| ZHOU_INFL  | 355 | 0.216363 | 1.111957 | 0.195622 | 0.401835 | 1 |
| WANG_PRC   | 62  | 0.275525 | 1.111105 | 0.284375 | 0.40321  | 1 |
| FINETTI_BF | 18  | 0.370894 | 1.110247 | 0.304647 | 0.40464  | 1 |
| CHIARADOI  | 113 | 0.255118 | 1.109456 | 0.276692 | 0.405859 | 1 |
| ST_MYOCY   | 23  | 0.348407 | 1.109214 | 0.326821 | 0.406019 | 1 |
| REACTOME   | 53  | 0.283927 | 1.108878 | 0.288676 | 0.406357 | 1 |
| WAMUNYC    | 249 | 0.22203  | 1.106112 | 0.220816 | 0.411669 | 1 |
| REACTOME   | 16  | 0.375886 | 1.105865 | 0.33677  | 0.411864 | 1 |
| REACTOME   | 17  | 0.38203  | 1.105793 | 0.315884 | 0.411692 | 1 |
| ALONSO_M   | 30  | 0.323206 | 1.105295 | 0.302721 | 0.412334 | 1 |
| GOLDRATH   | 310 | 0.215219 | 1.105085 | 0.214774 | 0.41244  | 1 |
| ST_B_CELL  | 39  | 0.300578 | 1.101858 | 0.303905 | 0.418633 | 1 |
| CHNG_MU    | 27  | 0.326003 | 1.099592 | 0.33389  | 0.422991 | 1 |
| BROWNE_I   | 222 | 0.22367  | 1.097925 | 0.247566 | 0.426028 | 1 |
| BENPORAT   | 177 | 0.23102  | 1.097722 | 0.260553 | 0.426091 | 1 |
| BIOCARTA_  | 15  | 0.376352 | 1.097695 | 0.341241 | 0.425817 | 1 |
| REACTOME   | 23  | 0.345287 | 1.097626 | 0.308824 | 0.425634 | 1 |
| VALK_AML   | 23  | 0.350651 | 1.096036 | 0.328231 | 0.428524 | 1 |
| OUILLETTE  | 69  | 0.266345 | 1.095884 | 0.30303  | 0.428506 | 1 |
| BIOCARTA_  | 19  | 0.360168 | 1.09581  | 0.322004 | 0.428335 | 1 |
| SHIPP_DLB  | 44  | 0.294152 | 1.095446 | 0.297521 | 0.428749 | 1 |
| CAIRO_LIVI | 204 | 0.22562  | 1.095222 | 0.26383  | 0.428891 | 1 |
| BIOCARTA_  | 44  | 0.289476 | 1.094289 | 0.311424 | 0.430389 | 1 |
| BANDRES_I  | 25  | 0.335045 | 1.09281  | 0.341256 | 0.433121 | 1 |
| KEGG_GLYC  | 26  | 0.324661 | 1.091669 | 0.327332 | 0.435149 | 1 |
| REACTOME   | 24  | 0.334413 | 1.091114 | 0.341584 | 0.436011 | 1 |

|            |     |          |          |          |          |   |
|------------|-----|----------|----------|----------|----------|---|
| GRESHOCK   | 312 | 0.21536  | 1.090751 | 0.227147 | 0.436402 | 1 |
| FIRESTEIN_ | 159 | 0.232754 | 1.090101 | 0.26393  | 0.437416 | 1 |
| VALK_AML   | 32  | 0.309033 | 1.089008 | 0.311367 | 0.439351 | 1 |
| REACTOME   | 157 | 0.230505 | 1.08854  | 0.285088 | 0.440043 | 1 |
| BIOCARTA_  | 22  | 0.341607 | 1.088248 | 0.316327 | 0.440313 | 1 |
| MULLIGHA   | 122 | 0.242188 | 1.088039 | 0.286834 | 0.440407 | 1 |
| KEGG_REG   | 206 | 0.224252 | 1.087361 | 0.287157 | 0.44152  | 1 |
| SCHLESING  | 87  | 0.254187 | 1.087229 | 0.298137 | 0.441468 | 1 |
| PAL_PRMT   | 27  | 0.326525 | 1.086955 | 0.315526 | 0.441725 | 1 |
| KORKOLA_   | 31  | 0.311725 | 1.086501 | 0.332773 | 0.442333 | 1 |
| SANA_RESF  | 79  | 0.258516 | 1.086101 | 0.280255 | 0.442806 | 1 |
| BEGUM_TA   | 49  | 0.283169 | 1.085724 | 0.299669 | 0.443316 | 1 |
| JIANG_HYP  | 57  | 0.273878 | 1.085537 | 0.315372 | 0.443363 | 1 |
| LEE_TARGE  | 76  | 0.263179 | 1.08552  | 0.295752 | 0.443078 | 1 |
| MCBRYAN_   | 118 | 0.241076 | 1.085329 | 0.282246 | 0.443136 | 1 |
| TAKAO_RE   | 71  | 0.262654 | 1.084803 | 0.327014 | 0.443901 | 1 |
| BOYLAN_M   | 28  | 0.317205 | 1.084674 | 0.332215 | 0.443847 | 1 |
| DAVICIONI  | 56  | 0.279231 | 1.08452  | 0.318493 | 0.443835 | 1 |
| SA_PTEN_F  | 16  | 0.371198 | 1.083829 | 0.352622 | 0.444931 | 1 |
| TARTE_PLA  | 38  | 0.300329 | 1.083181 | 0.344768 | 0.44596  | 1 |
| YAGI_AML   | 126 | 0.240481 | 1.082463 | 0.285501 | 0.447142 | 1 |
| DAZARD_U   | 122 | 0.238139 | 1.081986 | 0.298063 | 0.447828 | 1 |
| GENTILE_U  | 31  | 0.315446 | 1.081582 | 0.345299 | 0.448329 | 1 |
| LEE_LIVER  | 59  | 0.270315 | 1.080618 | 0.327044 | 0.449959 | 1 |
| MAHADEV    | 18  | 0.355216 | 1.080387 | 0.349091 | 0.450144 | 1 |
| LANDIS_ER  | 51  | 0.275239 | 1.0803   | 0.323777 | 0.449987 | 1 |
| VANTVEER   | 137 | 0.233603 | 1.080148 | 0.273932 | 0.449989 | 1 |
| LIU_VMYB   | 122 | 0.237517 | 1.07948  | 0.300296 | 0.451101 | 1 |
| KEGG_AMI   | 42  | 0.293224 | 1.079026 | 0.335034 | 0.451682 | 1 |
| LU_TUMOF   | 29  | 0.314155 | 1.077321 | 0.333916 | 0.454909 | 1 |
| MULLIGHA   | 319 | 0.210573 | 1.077018 | 0.280323 | 0.455175 | 1 |
| JAEGER_M   | 43  | 0.289619 | 1.076928 | 0.333333 | 0.455006 | 1 |
| YAO_HOXA   | 70  | 0.260609 | 1.075411 | 0.350413 | 0.458014 | 1 |
| DELLA_RES  | 20  | 0.342863 | 1.074307 | 0.357522 | 0.459995 | 1 |



|            |     |          |          |          |          |   |
|------------|-----|----------|----------|----------|----------|---|
| KEGG_POR   | 32  | 0.310562 | 1.074053 | 0.344715 | 0.460213 | 1 |
| NATSUME_   | 47  | 0.281613 | 1.072496 | 0.342373 | 0.463182 | 1 |
| KEGG_ADIF  | 67  | 0.260952 | 1.071966 | 0.345902 | 0.463943 | 1 |
| STEIN_ESR: | 82  | 0.250994 | 1.071494 | 0.345483 | 0.464645 | 1 |
| CAIRO_LIVI | 152 | 0.230227 | 1.071448 | 0.31339  | 0.464403 | 1 |
| FLECHNER_  | 24  | 0.331949 | 1.07037  | 0.348214 | 0.466464 | 1 |
| MILI_PSEU  | 39  | 0.297818 | 1.069065 | 0.338141 | 0.468812 | 1 |
| HEIDENBLA  | 29  | 0.318379 | 1.067241 | 0.335582 | 0.472446 | 1 |
| BIOCARTA_  | 19  | 0.355158 | 1.066921 | 0.382003 | 0.472815 | 1 |
| YANAGIHAI  | 22  | 0.336177 | 1.06631  | 0.35506  | 0.473735 | 1 |
| BYSTRYKH_  | 160 | 0.226492 | 1.06556  | 0.306902 | 0.475029 | 1 |
| REACTOME   | 17  | 0.360486 | 1.064838 | 0.364437 | 0.476225 | 1 |
| ICHIBA_GR  | 43  | 0.287831 | 1.063963 | 0.359143 | 0.477797 | 1 |
| DOANE_RE   | 173 | 0.225173 | 1.063735 | 0.333333 | 0.477957 | 1 |
| KEGG_REN.  | 68  | 0.264526 | 1.062832 | 0.355372 | 0.479574 | 1 |
| REACTOME   | 15  | 0.36988  | 1.062687 | 0.377193 | 0.479558 | 1 |
| HOFMANN    | 21  | 0.343251 | 1.062191 | 0.367857 | 0.480269 | 1 |
| SU_THYML   | 20  | 0.347642 | 1.061927 | 0.38676  | 0.480496 | 1 |
| CAFFAREL_  | 25  | 0.323513 | 1.060085 | 0.363328 | 0.484202 | 1 |
| LU_TUMOF   | 22  | 0.34114  | 1.059669 | 0.380379 | 0.484782 | 1 |
| REACTOME   | 28  | 0.315702 | 1.059427 | 0.380789 | 0.484961 | 1 |
| ZHAN_MUI   | 50  | 0.276502 | 1.058985 | 0.362205 | 0.485616 | 1 |
| REACTOME   | 59  | 0.264331 | 1.058396 | 0.363192 | 0.486526 | 1 |
| REACTOME   | 25  | 0.325138 | 1.05815  | 0.374113 | 0.486707 | 1 |
| GUTIERREZ  | 34  | 0.3037   | 1.057566 | 0.385382 | 0.487651 | 1 |
| KEGG_ASC   | 17  | 0.360152 | 1.057535 | 0.387097 | 0.48736  | 1 |
| VANHARAM   | 42  | 0.286331 | 1.057011 | 0.366612 | 0.488155 | 1 |
| BASAKI_YB  | 280 | 0.210343 | 1.056362 | 0.313172 | 0.489267 | 1 |
| BIOCARTA_  | 18  | 0.35719  | 1.056198 | 0.40395  | 0.489261 | 1 |
| OUELLET_C  | 113 | 0.238944 | 1.05607  | 0.358521 | 0.489188 | 1 |
| HAHTOLA_   | 111 | 0.23831  | 1.056007 | 0.334884 | 0.488976 | 1 |
| CHEBOTAE'  | 68  | 0.254742 | 1.055386 | 0.348243 | 0.489894 | 1 |
| FARMER_B   | 19  | 0.349866 | 1.055138 | 0.401372 | 0.49009  | 1 |
| REACTOME   | 23  | 0.332231 | 1.054205 | 0.394295 | 0.49174  | 1 |

|            |     |          |          |          |          |   |
|------------|-----|----------|----------|----------|----------|---|
| BIOCARTA_  | 26  | 0.322551 | 1.053738 | 0.382353 | 0.492374 | 1 |
| LEE_META   | 41  | 0.285641 | 1.052652 | 0.383721 | 0.494406 | 1 |
| BIOCARTA_  | 28  | 0.304495 | 1.05182  | 0.367973 | 0.495913 | 1 |
| NAKAMUR    | 45  | 0.275348 | 1.050492 | 0.356452 | 0.498541 | 1 |
| REACTOME   | 277 | 0.21011  | 1.049534 | 0.34069  | 0.500294 | 1 |
| BARRIER_C  | 30  | 0.302631 | 1.049436 | 0.385643 | 0.500136 | 1 |
| FLECHNER_  | 147 | 0.224869 | 1.048035 | 0.342688 | 0.50292  | 1 |
| REACTOME   | 26  | 0.322355 | 1.047797 | 0.360485 | 0.503069 | 1 |
| KEGG_MEL   | 69  | 0.255118 | 1.047573 | 0.385    | 0.50322  | 1 |
| KEGG_COL   | 60  | 0.260705 | 1.046744 | 0.363636 | 0.504691 | 1 |
| WATANABI   | 63  | 0.260842 | 1.046704 | 0.385382 | 0.504423 | 1 |
| KUROKAW    | 17  | 0.347824 | 1.046429 | 0.388601 | 0.504699 | 1 |
| BASSO_CD   | 64  | 0.261538 | 1.045799 | 0.373997 | 0.505764 | 1 |
| CHIANG_LI  | 26  | 0.317033 | 1.045297 | 0.393238 | 0.506552 | 1 |
| FONTAINE_  | 31  | 0.300911 | 1.044848 | 0.402377 | 0.507133 | 1 |
| DOANE_RE   | 231 | 0.21257  | 1.04483  | 0.335277 | 0.506816 | 1 |
| ZHANG_BR   | 132 | 0.229794 | 1.043726 | 0.343195 | 0.508881 | 1 |
| LAMB_CCN   | 15  | 0.361097 | 1.043239 | 0.408772 | 0.509596 | 1 |
| HOQUE_M    | 56  | 0.266263 | 1.042318 | 0.395    | 0.511342 | 1 |
| KORKOLA_   | 40  | 0.280483 | 1.042305 | 0.383471 | 0.511019 | 1 |
| FRASOR_T   | 47  | 0.275707 | 1.041305 | 0.394945 | 0.512928 | 1 |
| KIM_WT1_   | 432 | 0.199111 | 1.041149 | 0.362809 | 0.512909 | 1 |
| JISON_SICK | 164 | 0.221029 | 1.040837 | 0.357143 | 0.513217 | 1 |
| RAMALHO_   | 187 | 0.217313 | 1.040607 | 0.361151 | 0.513371 | 1 |
| PARK_APL_  | 38  | 0.286744 | 1.039683 | 0.405    | 0.515    | 1 |
| BOYLAN_M   | 37  | 0.290855 | 1.037601 | 0.392092 | 0.519311 | 1 |
| STARK_PRE  | 170 | 0.218638 | 1.037443 | 0.358382 | 0.519289 | 1 |
| KEGG_PEN   | 26  | 0.31604  | 1.036949 | 0.40894  | 0.520074 | 1 |
| VANHARAN   | 63  | 0.256373 | 1.036452 | 0.396694 | 0.520826 | 1 |
| LUI_THYRC  | 42  | 0.280108 | 1.035432 | 0.384095 | 0.522726 | 1 |
| ACEVEDO_   | 162 | 0.21984  | 1.034779 | 0.37092  | 0.523836 | 1 |
| GAL_LEUKE  | 234 | 0.209276 | 1.034036 | 0.372155 | 0.525137 | 1 |
| WU_HBX_1   | 17  | 0.347197 | 1.033926 | 0.426471 | 0.525017 | 1 |
| REACTOME   | 27  | 0.306368 | 1.033685 | 0.418033 | 0.525192 | 1 |

|            |     |          |          |          |          |   |
|------------|-----|----------|----------|----------|----------|---|
| LUI_THYRC  | 25  | 0.311929 | 1.03328  | 0.412727 | 0.525698 | 1 |
| HADDAD_T   | 63  | 0.25658  | 1.03309  | 0.399679 | 0.525733 | 1 |
| THUM_SYS   | 206 | 0.211223 | 1.032566 | 0.382436 | 0.526542 | 1 |
| KIM_MYC_   | 65  | 0.256778 | 1.031705 | 0.404605 | 0.528153 | 1 |
| REACTOME   | 62  | 0.25452  | 1.031488 | 0.410494 | 0.5283   | 1 |
| RASHI_RES  | 76  | 0.249189 | 1.03095  | 0.405145 | 0.52912  | 1 |
| PEREZ_TP6  | 320 | 0.202216 | 1.030676 | 0.384717 | 0.529331 | 1 |
| BIOCARTA_  | 20  | 0.335769 | 1.030611 | 0.4      | 0.529116 | 1 |
| SESTO_RES  | 103 | 0.234779 | 1.030484 | 0.402941 | 0.529042 | 1 |
| LEE_RECEN  | 99  | 0.233311 | 1.030002 | 0.381818 | 0.529748 | 1 |
| KEGG_ALPI  | 17  | 0.348518 | 1.02998  | 0.415929 | 0.529445 | 1 |
| KOKKINAKI  | 60  | 0.260564 | 1.029721 | 0.402191 | 0.529659 | 1 |
| KEGG_GLYC  | 48  | 0.269014 | 1.029665 | 0.39531  | 0.529415 | 1 |
| BROWNE_I   | 156 | 0.220188 | 1.028508 | 0.389381 | 0.531724 | 1 |
| LIN_NPAS4  | 62  | 0.256662 | 1.028359 | 0.401274 | 0.53167  | 1 |
| LANDIS_ER  | 20  | 0.329255 | 1.028276 | 0.411867 | 0.531475 | 1 |
| HATADA_N   | 31  | 0.294496 | 1.027868 | 0.420099 | 0.531983 | 1 |
| HINATA_NI  | 17  | 0.345687 | 1.027637 | 0.432574 | 0.532175 | 1 |
| ZHAN_V2_I  | 33  | 0.29438  | 1.027587 | 0.424779 | 0.531933 | 1 |
| GAZDA_DI/  | 23  | 0.3218   | 1.027319 | 0.436396 | 0.532161 | 1 |
| KEGG_FC_I  | 77  | 0.245782 | 1.027288 | 0.410628 | 0.531854 | 1 |
| GRADE_CO   | 73  | 0.248327 | 1.024859 | 0.407524 | 0.536906 | 1 |
| SHAFFER_II | 62  | 0.254657 | 1.022898 | 0.403624 | 0.540997 | 1 |
| SAGIV_CD2  | 23  | 0.318768 | 1.022805 | 0.422003 | 0.540818 | 1 |
| REACTOME   | 49  | 0.270671 | 1.022282 | 0.42691  | 0.541649 | 1 |
| BIOCARTA_  | 15  | 0.357095 | 1.022017 | 0.40177  | 0.541906 | 1 |
| KEGG_PEN   | 19  | 0.333869 | 1.021393 | 0.428571 | 0.542935 | 1 |
| KEGG_TYPI  | 46  | 0.271029 | 1.020371 | 0.421488 | 0.544891 | 1 |
| SU_PANCR   | 51  | 0.261725 | 1.020318 | 0.416268 | 0.544631 | 1 |
| REACTOME   | 216 | 0.208696 | 1.020118 | 0.40085  | 0.544706 | 1 |
| WOTTON_I   | 26  | 0.307885 | 1.01963  | 0.433735 | 0.545444 | 1 |
| CHENG_RE   | 27  | 0.299658 | 1.019612 | 0.410935 | 0.545104 | 1 |
| EBAUER_T/  | 46  | 0.268794 | 1.019546 | 0.411667 | 0.544882 | 1 |
| GAUSSMAN   | 19  | 0.338442 | 1.018926 | 0.416813 | 0.545925 | 1 |

|            |     |          |          |          |          |   |
|------------|-----|----------|----------|----------|----------|---|
| HOFMANN    | 21  | 0.324042 | 1.01852  | 0.409091 | 0.54648  | 1 |
| DING_LUNG  | 20  | 0.324507 | 1.018351 | 0.453752 | 0.546469 | 1 |
| BOGNI_TRE  | 24  | 0.318722 | 1.017197 | 0.427365 | 0.548662 | 1 |
| KEGG_GLU   | 49  | 0.264709 | 1.016645 | 0.430921 | 0.549591 | 1 |
| VARELA_ZN  | 33  | 0.295008 | 1.014831 | 0.44426  | 0.553209 | 1 |
| GARGALOV   | 58  | 0.253693 | 1.014071 | 0.443163 | 0.5546   | 1 |
| XU_CREBBI  | 24  | 0.312049 | 1.013921 | 0.428082 | 0.554579 | 1 |
| KEGG_PRIM  | 34  | 0.286387 | 1.013038 | 0.445161 | 0.55618  | 1 |
| REACTOME   | 18  | 0.334184 | 1.012808 | 0.433798 | 0.556295 | 1 |
| BIOCARTA_  | 22  | 0.316607 | 1.011866 | 0.447602 | 0.558055 | 1 |
| GRABARCZ   | 70  | 0.248266 | 1.011628 | 0.447712 | 0.558233 | 1 |
| ROVERSI_G  | 79  | 0.236871 | 1.011558 | 0.398074 | 0.558012 | 1 |
| SU_SALIVA  | 15  | 0.354312 | 1.011452 | 0.442478 | 0.557889 | 1 |
| SMID_BRE/  | 93  | 0.232662 | 1.011308 | 0.44164  | 0.557859 | 1 |
| KEGG_PYRI  | 40  | 0.272926 | 1.0109   | 0.437186 | 0.558427 | 1 |
| WATANABI   | 26  | 0.305767 | 1.009986 | 0.453767 | 0.560191 | 1 |
| BOYLAN_M   | 37  | 0.278496 | 1.009511 | 0.434122 | 0.560913 | 1 |
| VALK_AML   | 28  | 0.298861 | 1.008744 | 0.434343 | 0.562219 | 1 |
| REACTOME   | 431 | 0.190115 | 1.007941 | 0.427056 | 0.563656 | 1 |
| REACTOME   | 21  | 0.317912 | 1.007665 | 0.448582 | 0.563891 | 1 |
| BIOCARTA_  | 23  | 0.318966 | 1.007406 | 0.430769 | 0.564131 | 1 |
| OUELLET_C  | 67  | 0.246541 | 1.007297 | 0.428571 | 0.564032 | 1 |
| BIOCARTA_  | 41  | 0.269742 | 1.00641  | 0.459459 | 0.565631 | 1 |
| YAGI_AML   | 349 | 0.197026 | 1.0054   | 0.439689 | 0.567621 | 1 |
| VANHARAN   | 35  | 0.279774 | 1.005046 | 0.452769 | 0.568085 | 1 |
| SIG_IL4REC | 27  | 0.308697 | 1.005006 | 0.45975  | 0.567804 | 1 |
| KEGG_VEG   | 73  | 0.241562 | 1.004887 | 0.450082 | 0.567697 | 1 |
| BENPORAT   | 217 | 0.206883 | 1.004391 | 0.45706  | 0.56841  | 1 |
| BENPORAT   | 288 | 0.19896  | 1.003605 | 0.449931 | 0.569842 | 1 |
| KEGG_LON   | 69  | 0.244599 | 1.003508 | 0.4464   | 0.569676 | 1 |
| IWANAGA_   | 107 | 0.225645 | 1.000711 | 0.460961 | 0.575599 | 1 |
| AMIT_SERL  | 19  | 0.324876 | 1.000225 | 0.465157 | 0.576306 | 1 |
| BIOCARTA_  | 23  | 0.303284 | 0.998808 | 0.45098  | 0.579151 | 1 |
| ODONNELL   | 77  | 0.237455 | 0.996879 | 0.444109 | 0.5832   | 1 |

|            |     |          |          |          |          |   |
|------------|-----|----------|----------|----------|----------|---|
| HAHTOLA_   | 24  | 0.307377 | 0.996457 | 0.451014 | 0.583813 | 1 |
| FERNANDE   | 173 | 0.210984 | 0.995946 | 0.500728 | 0.584595 | 1 |
| RIZKI_TUM  | 228 | 0.200968 | 0.995753 | 0.457971 | 0.58466  | 1 |
| REACTOME   | 81  | 0.237386 | 0.995529 | 0.48336  | 0.584794 | 1 |
| KEGG_ABC   | 43  | 0.269979 | 0.995008 | 0.433836 | 0.585634 | 1 |
| ROSS_AML   | 75  | 0.241859 | 0.993796 | 0.459168 | 0.588095 | 1 |
| MORI_SMA   | 60  | 0.250713 | 0.993164 | 0.475793 | 0.589172 | 1 |
| KESHELAV   | 77  | 0.236188 | 0.992408 | 0.488525 | 0.59058  | 1 |
| YAGI_AML   | 121 | 0.223483 | 0.992152 | 0.482496 | 0.590772 | 1 |
| KEGG_CYT   | 54  | 0.25668  | 0.992004 | 0.482003 | 0.590737 | 1 |
| REACTOME   | 166 | 0.207999 | 0.991282 | 0.468148 | 0.591973 | 1 |
| NIKOLSKY_  | 127 | 0.218104 | 0.99049  | 0.47181  | 0.593368 | 1 |
| RAMASWA    | 57  | 0.250423 | 0.989594 | 0.460237 | 0.595036 | 1 |
| VALK_AML   | 27  | 0.297022 | 0.989099 | 0.480475 | 0.595787 | 1 |
| MULLIGHA   | 127 | 0.217663 | 0.988479 | 0.490798 | 0.596819 | 1 |
| HWANG_PI   | 28  | 0.291737 | 0.987661 | 0.464286 | 0.598364 | 1 |
| GARGALOV   | 25  | 0.301556 | 0.987179 | 0.478849 | 0.599075 | 1 |
| NIKOLSKY_  | 70  | 0.240051 | 0.986192 | 0.471407 | 0.600934 | 1 |
| SIG_PIP3_S | 33  | 0.278372 | 0.985703 | 0.458746 | 0.601707 | 1 |
| LIANG_HEM  | 15  | 0.344719 | 0.98414  | 0.486207 | 0.604985 | 1 |
| KEGG_SNA   | 38  | 0.273874 | 0.983966 | 0.499136 | 0.605016 | 1 |
| BIOCARTA_  | 23  | 0.30634  | 0.98254  | 0.464883 | 0.608046 | 1 |
| REACTOME   | 377 | 0.189123 | 0.980397 | 0.512821 | 0.612662 | 1 |
| KORKOLA_   | 15  | 0.351537 | 0.979836 | 0.50613  | 0.613528 | 1 |
| BOYALT_I   | 104 | 0.222177 | 0.979771 | 0.495298 | 0.613282 | 1 |
| BROWNE_I   | 67  | 0.241377 | 0.979292 | 0.477049 | 0.614031 | 1 |
| NUNODA_I   | 27  | 0.293    | 0.978691 | 0.497569 | 0.615051 | 1 |
| REACTOME   | 37  | 0.274947 | 0.97776  | 0.511745 | 0.61677  | 1 |
| ASTIER_INT | 55  | 0.247145 | 0.977608 | 0.492891 | 0.616728 | 1 |
| REACTOME   | 16  | 0.343155 | 0.977294 | 0.478417 | 0.617059 | 1 |
| LINDGREN_  | 369 | 0.190483 | 0.976964 | 0.507246 | 0.61743  | 1 |
| ZUCCHI_M   | 25  | 0.302579 | 0.975922 | 0.508651 | 0.619425 | 1 |
| SWEET_KR   | 20  | 0.321161 | 0.975395 | 0.498227 | 0.620241 | 1 |
| YAMASHIT   | 45  | 0.262773 | 0.975022 | 0.491776 | 0.620726 | 1 |

|            |     |          |          |          |          |   |
|------------|-----|----------|----------|----------|----------|---|
| BIOCARTA_  | 21  | 0.309524 | 0.974804 | 0.493976 | 0.62083  | 1 |
| SHEDDEN_   | 281 | 0.193231 | 0.974372 | 0.546575 | 0.621465 | 1 |
| MOOTHA_    | 31  | 0.281193 | 0.973861 | 0.48552  | 0.622236 | 1 |
| URS_ADIPC  | 59  | 0.248783 | 0.973365 | 0.497592 | 0.623011 | 1 |
| SCIBETTA_I | 77  | 0.232101 | 0.972785 | 0.516746 | 0.623899 | 1 |
| DAVIES_MI  | 20  | 0.317046 | 0.972701 | 0.514681 | 0.623691 | 1 |
| LUI_THYRO  | 40  | 0.263054 | 0.971395 | 0.475    | 0.626341 | 1 |
| WATANABI   | 97  | 0.222104 | 0.971154 | 0.507716 | 0.626499 | 1 |
| DAVICIONI_ | 64  | 0.242875 | 0.970472 | 0.506998 | 0.627612 | 1 |
| ZHAN_MUI   | 29  | 0.2856   | 0.970278 | 0.524735 | 0.627669 | 1 |
| KEGG_END   | 176 | 0.205492 | 0.969785 | 0.534207 | 0.628437 | 1 |
| YU_MYC_T   | 43  | 0.260483 | 0.969744 | 0.491883 | 0.628127 | 1 |
| HAHTOLA_   | 171 | 0.204324 | 0.969572 | 0.5317   | 0.628099 | 1 |
| KEGG_GLYC  | 62  | 0.243829 | 0.969105 | 0.50641  | 0.628753 | 1 |
| APPIERTO_  | 33  | 0.275978 | 0.968744 | 0.50678  | 0.629183 | 1 |
| AMBROSIN   | 107 | 0.21818  | 0.968189 | 0.522936 | 0.630056 | 1 |
| CAVARD_LI  | 26  | 0.291852 | 0.967264 | 0.502564 | 0.631815 | 1 |
| LINDGREN_  | 116 | 0.217377 | 0.96549  | 0.524691 | 0.635536 | 1 |
| XU_GH1_A   | 174 | 0.203059 | 0.96464  | 0.541298 | 0.637071 | 1 |
| GENTILE_U  | 22  | 0.300181 | 0.963286 | 0.517529 | 0.639845 | 1 |
| MILI_PSEU  | 64  | 0.238686 | 0.963053 | 0.51634  | 0.639994 | 1 |
| BIOCARTA_  | 19  | 0.315527 | 0.962726 | 0.517483 | 0.640347 | 1 |
| VERRECCHI  | 20  | 0.30935  | 0.962218 | 0.512479 | 0.641173 | 1 |
| SHIPP_DLB  | 43  | 0.261099 | 0.961963 | 0.542857 | 0.641351 | 1 |
| REACTOME   | 23  | 0.303591 | 0.961141 | 0.512028 | 0.642789 | 1 |
| PEREZ_TP5  | 185 | 0.20101  | 0.961068 | 0.539568 | 0.642549 | 1 |
| RICKMAN_   | 101 | 0.220434 | 0.958976 | 0.533437 | 0.647172 | 1 |
| CHAUHAN_   | 94  | 0.224058 | 0.958962 | 0.544304 | 0.646775 | 1 |
| BERTUCCI_  | 45  | 0.256276 | 0.958499 | 0.509934 | 0.647433 | 1 |
| LEE_TARGE  | 49  | 0.252203 | 0.956579 | 0.537438 | 0.651412 | 1 |
| DACOSTA_   | 46  | 0.250638 | 0.955969 | 0.528926 | 0.652474 | 1 |
| BIOCARTA_  | 36  | 0.261653 | 0.955872 | 0.523973 | 0.652295 | 1 |
| REACTOME   | 76  | 0.231981 | 0.955791 | 0.551988 | 0.652056 | 1 |
| REACTOME   | 330 | 0.185258 | 0.955742 | 0.591588 | 0.651751 | 1 |

|            |     |          |          |          |          |   |
|------------|-----|----------|----------|----------|----------|---|
| LOPES_ME   | 26  | 0.289781 | 0.955695 | 0.529215 | 0.651461 | 1 |
| BOYLAN_M   | 79  | 0.229725 | 0.955528 | 0.542636 | 0.651451 | 1 |
| SENGUPTA   | 268 | 0.189463 | 0.95415  | 0.590848 | 0.654272 | 1 |
| MOHANKU    | 383 | 0.183131 | 0.95284  | 0.617801 | 0.656881 | 1 |
| REACTOME   | 47  | 0.246232 | 0.952763 | 0.525253 | 0.656631 | 1 |
| POMEROY_   | 38  | 0.25804  | 0.952755 | 0.540362 | 0.656232 | 1 |
| KORKOLA_   | 21  | 0.305385 | 0.951469 | 0.520548 | 0.658739 | 1 |
| SHEN_SMA   | 319 | 0.186952 | 0.948804 | 0.615702 | 0.664548 | 1 |
| BYSTRYKH_  | 57  | 0.24017  | 0.948462 | 0.524116 | 0.664925 | 1 |
| GOLDRATH   | 152 | 0.205906 | 0.948237 | 0.591041 | 0.665036 | 1 |
| REACTOME   | 36  | 0.265933 | 0.94608  | 0.570234 | 0.669856 | 1 |
| ACEVEDO_   | 186 | 0.196192 | 0.945767 | 0.596567 | 0.67018  | 1 |
| NIKOLSKY_  | 327 | 0.183583 | 0.945524 | 0.609211 | 0.670291 | 1 |
| BIOCARTA_  | 22  | 0.298014 | 0.94552  | 0.53886  | 0.669874 | 1 |
| WANG_CLI   | 225 | 0.193123 | 0.944699 | 0.609244 | 0.671325 | 1 |
| ST_FAS_SIC | 58  | 0.240269 | 0.943707 | 0.540881 | 0.673142 | 1 |
| WILCOX_PI  | 148 | 0.203482 | 0.942726 | 0.561765 | 0.674998 | 1 |
| MCMURRA    | 64  | 0.235774 | 0.942692 | 0.565287 | 0.674663 | 1 |
| WHITEHUR   | 33  | 0.264907 | 0.941427 | 0.560935 | 0.677191 | 1 |
| SCHUETZ_E  | 83  | 0.220721 | 0.940455 | 0.595541 | 0.679102 | 1 |
| KEGG_BAS   | 55  | 0.240419 | 0.940165 | 0.538206 | 0.679313 | 1 |
| KEGG_INSL  | 134 | 0.205916 | 0.938888 | 0.590164 | 0.68185  | 1 |
| SHIPP_DLB  | 35  | 0.261914 | 0.938493 | 0.55574  | 0.68235  | 1 |
| MORI_PLA   | 19  | 0.310357 | 0.938466 | 0.531306 | 0.681981 | 1 |
| BIOCARTA_  | 27  | 0.278569 | 0.937823 | 0.538983 | 0.683064 | 1 |
| BHATI_G2M  | 115 | 0.20931  | 0.937005 | 0.599398 | 0.684565 | 1 |
| MULLIGHA   | 256 | 0.187823 | 0.936693 | 0.620397 | 0.684832 | 1 |
| BERTUCCI_  | 188 | 0.194631 | 0.936045 | 0.623734 | 0.685922 | 1 |
| BOYLAN_M   | 109 | 0.208654 | 0.935089 | 0.580398 | 0.687744 | 1 |
| UDAYAKUN   | 128 | 0.207032 | 0.933475 | 0.602447 | 0.691031 | 1 |
| KEGG_REN   | 17  | 0.313602 | 0.932577 | 0.535473 | 0.692636 | 1 |
| NGUYEN_N   | 21  | 0.299613 | 0.932005 | 0.539364 | 0.693538 | 1 |
| BIOCARTA_  | 19  | 0.312895 | 0.93112  | 0.563574 | 0.695148 | 1 |
| REACTOME   | 30  | 0.270969 | 0.930423 | 0.544465 | 0.69632  | 1 |

|            |     |          |          |          |          |   |
|------------|-----|----------|----------|----------|----------|---|
| YAO_TEMP   | 44  | 0.249452 | 0.929523 | 0.591803 | 0.698041 | 1 |
| HEIDENBLA  | 31  | 0.270823 | 0.929468 | 0.553922 | 0.697738 | 1 |
| SETLUR_PR  | 20  | 0.300156 | 0.929129 | 0.549822 | 0.698091 | 1 |
| CHANG_CC   | 31  | 0.267411 | 0.927975 | 0.565217 | 0.700285 | 1 |
| RIZ_ERYTHI | 37  | 0.257314 | 0.927916 | 0.587748 | 0.69998  | 1 |
| MAHAJAN_   | 60  | 0.230858 | 0.927679 | 0.601318 | 0.700119 | 1 |
| KENNY_CTI  | 41  | 0.255172 | 0.927418 | 0.574879 | 0.700289 | 1 |
| KEGG_PRO   | 32  | 0.268349 | 0.926889 | 0.548495 | 0.701049 | 1 |
| BIOCARTA_  | 16  | 0.319191 | 0.926545 | 0.554007 | 0.701392 | 1 |
| MARIADAS   | 23  | 0.289469 | 0.925969 | 0.580205 | 0.702357 | 1 |
| WANG_RES   | 22  | 0.292238 | 0.924741 | 0.553633 | 0.704727 | 1 |
| KAAB_HEA   | 251 | 0.185358 | 0.924562 | 0.658904 | 0.704692 | 1 |
| ROSS_AML   | 71  | 0.222329 | 0.923613 | 0.60155  | 0.706463 | 1 |
| OKAWA_NI   | 20  | 0.300959 | 0.922632 | 0.566494 | 0.708195 | 1 |
| ST_G_ALPH  | 34  | 0.26251  | 0.922506 | 0.579392 | 0.70804  | 1 |
| NIKOLSKY_  | 52  | 0.238284 | 0.921509 | 0.602291 | 0.709905 | 1 |
| RIZ_ERYTHI | 25  | 0.279351 | 0.920226 | 0.578595 | 0.712412 | 1 |
| BROWNE_I   | 175 | 0.193581 | 0.919259 | 0.649499 | 0.714228 | 1 |
| KEGG_TYR   | 40  | 0.247988 | 0.917706 | 0.593646 | 0.717478 | 1 |
| SIG_PIP3_S | 62  | 0.228273 | 0.917669 | 0.585526 | 0.717118 | 1 |
| YAUCH_HE   | 128 | 0.201983 | 0.917654 | 0.647059 | 0.716707 | 1 |
| BIOCARTA_  | 15  | 0.31782  | 0.917276 | 0.577193 | 0.717124 | 1 |
| WILLIAMS_  | 21  | 0.295812 | 0.916213 | 0.58348  | 0.719106 | 1 |
| MORI_MAI   | 70  | 0.223217 | 0.916027 | 0.579439 | 0.719058 | 1 |
| MORI_IMM   | 41  | 0.25145  | 0.915771 | 0.594324 | 0.719192 | 1 |
| NIKOLSKY_  | 17  | 0.313579 | 0.914887 | 0.571675 | 0.720813 | 1 |
| REACTOME   | 32  | 0.258806 | 0.914664 | 0.597623 | 0.720848 | 1 |
| REACTOME   | 19  | 0.303063 | 0.914102 | 0.589606 | 0.721715 | 1 |
| DING_LUN   | 26  | 0.273242 | 0.913482 | 0.571895 | 0.722731 | 1 |
| ZHAN_MUI   | 51  | 0.238838 | 0.913459 | 0.608547 | 0.722331 | 1 |
| SEKI_INFLA | 22  | 0.28625  | 0.913444 | 0.612174 | 0.721929 | 1 |
| WANG_REC   | 16  | 0.308878 | 0.912522 | 0.577465 | 0.723567 | 1 |
| LUI_TARGE  | 30  | 0.268883 | 0.912103 | 0.594324 | 0.724084 | 1 |
| KEGG_OLF   | 373 | 0.174663 | 0.910553 | 0.746819 | 0.727172 | 1 |



|           |     |          |          |          |          |   |
|-----------|-----|----------|----------|----------|----------|---|
| REACTOME  | 26  | 0.274246 | 0.910349 | 0.588435 | 0.727191 | 1 |
| ZHAN_MUI  | 44  | 0.241861 | 0.910143 | 0.608547 | 0.727212 | 1 |
| BIOCARTA_ | 23  | 0.283373 | 0.908136 | 0.573171 | 0.731353 | 1 |
| HSC_MATL  | 15  | 0.317501 | 0.90783  | 0.56239  | 0.731631 | 1 |
| HATADA_M  | 354 | 0.175351 | 0.906659 | 0.730871 | 0.73387  | 1 |
| KEGG_PHE  | 16  | 0.312287 | 0.905929 | 0.571429 | 0.735071 | 1 |
| CHARAFE_I | 47  | 0.240678 | 0.905617 | 0.62585  | 0.735364 | 1 |
| SENGUPTA  | 143 | 0.19786  | 0.905265 | 0.678312 | 0.735681 | 1 |
| YAO_TEMP  | 72  | 0.219115 | 0.904591 | 0.661417 | 0.736801 | 1 |
| FARMER_B  | 20  | 0.289828 | 0.903667 | 0.587611 | 0.738429 | 1 |
| REACTOME  | 48  | 0.235642 | 0.901016 | 0.625207 | 0.743959 | 1 |
| KORKOLA_  | 42  | 0.244859 | 0.901006 | 0.623064 | 0.743525 | 1 |
| KEGG_GLIC | 63  | 0.222482 | 0.900136 | 0.64918  | 0.744989 | 1 |
| GARGALOV  | 22  | 0.284741 | 0.898609 | 0.595925 | 0.747855 | 1 |
| MULLIGHA  | 73  | 0.21488  | 0.898506 | 0.667727 | 0.747655 | 1 |
| PYEON_CA  | 28  | 0.262907 | 0.895985 | 0.614122 | 0.752858 | 1 |
| RASHI_RES | 48  | 0.232989 | 0.895672 | 0.650564 | 0.753072 | 1 |
| VECCHI_GA | 126 | 0.195802 | 0.894244 | 0.706949 | 0.755821 | 1 |
| REACTOME  | 42  | 0.241564 | 0.892187 | 0.661667 | 0.759895 | 1 |
| REACTOME  | 18  | 0.298449 | 0.892036 | 0.608084 | 0.759781 | 1 |
| SU_KIDNEY | 15  | 0.311735 | 0.891496 | 0.60274  | 0.760499 | 1 |
| PETRETTO_ | 23  | 0.279877 | 0.890639 | 0.623489 | 0.761937 | 1 |
| BIOCARTA_ | 22  | 0.28318  | 0.887333 | 0.616695 | 0.768768 | 1 |
| REACTOME  | 54  | 0.226688 | 0.886207 | 0.655556 | 0.770767 | 1 |
| KEGG_SELE | 26  | 0.26578  | 0.886092 | 0.629964 | 0.770534 | 1 |
| REACTOME  | 214 | 0.18337  | 0.885703 | 0.759887 | 0.770915 | 1 |
| KEGG_PERI | 77  | 0.212637 | 0.885384 | 0.69278  | 0.771115 | 1 |
| BONCI_TAF | 78  | 0.208633 | 0.885076 | 0.675969 | 0.771309 | 1 |
| REACTOME  | 102 | 0.202723 | 0.885012 | 0.693939 | 0.77098  | 1 |
| BIOCARTA_ | 18  | 0.294879 | 0.884288 | 0.625    | 0.772099 | 1 |
| CHANDRAN  | 77  | 0.210027 | 0.883999 | 0.672078 | 0.772291 | 1 |
| RIZKI_TUM | 63  | 0.220026 | 0.883359 | 0.683706 | 0.773147 | 1 |
| RICKMAN_  | 33  | 0.252154 | 0.882755 | 0.649215 | 0.77398  | 1 |
| BIOCARTA_ | 17  | 0.297609 | 0.882175 | 0.615385 | 0.774774 | 1 |

|            |     |          |          |          |          |   |
|------------|-----|----------|----------|----------|----------|---|
| REACTOME   | 34  | 0.249124 | 0.881494 | 0.629005 | 0.775823 | 1 |
| KEGG_EPIT  | 68  | 0.214779 | 0.880907 | 0.681967 | 0.776579 | 1 |
| SIG_CD40P  | 33  | 0.250821 | 0.88077  | 0.642017 | 0.776409 | 1 |
| KEGG_PAN   | 16  | 0.296157 | 0.880594 | 0.613757 | 0.776371 | 1 |
| JAZAG_TGF  | 106 | 0.200204 | 0.878251 | 0.713405 | 0.78106  | 1 |
| BIOCARTA_  | 17  | 0.291775 | 0.878091 | 0.632689 | 0.78094  | 1 |
| REACTOME   | 121 | 0.194395 | 0.878061 | 0.730475 | 0.780544 | 1 |
| REACTOME   | 24  | 0.274062 | 0.877337 | 0.650338 | 0.781677 | 1 |
| REACTOME   | 34  | 0.252744 | 0.876925 | 0.663317 | 0.782109 | 1 |
| BIOCARTA_  | 18  | 0.287788 | 0.876657 | 0.637607 | 0.782219 | 1 |
| KEGG_VAS   | 43  | 0.238443 | 0.876497 | 0.641997 | 0.782092 | 1 |
| DAVICIONI_ | 315 | 0.172498 | 0.876438 | 0.801351 | 0.781759 | 1 |
| RIZ_ERYTH  | 29  | 0.254075 | 0.875564 | 0.679466 | 0.783173 | 1 |
| MURAKAM    | 18  | 0.29488  | 0.875092 | 0.648881 | 0.783722 | 1 |
| BARRIER_C  | 33  | 0.25104  | 0.874918 | 0.652921 | 0.783652 | 1 |
| NAKAJIMA_  | 21  | 0.275755 | 0.874906 | 0.649485 | 0.783216 | 1 |
| MARTINEZ_  | 58  | 0.21837  | 0.874797 | 0.705387 | 0.782979 | 1 |
| JI_RESPON: | 46  | 0.23178  | 0.872541 | 0.678457 | 0.787197 | 1 |
| BIOCARTA_  | 18  | 0.287499 | 0.871036 | 0.629693 | 0.789902 | 1 |
| WEI_MIR3:  | 145 | 0.188748 | 0.870999 | 0.737075 | 0.789513 | 1 |
| MILI_PSEU  | 445 | 0.166169 | 0.870262 | 0.86514  | 0.79059  | 1 |
| KEGG_PATI  | 55  | 0.218239 | 0.868799 | 0.693548 | 0.793187 | 1 |
| KEGG_CHE   | 185 | 0.179382 | 0.866976 | 0.796243 | 0.796532 | 1 |
| SA_B_CELL  | 24  | 0.262522 | 0.866002 | 0.674783 | 0.798059 | 1 |
| REACTOME   | 49  | 0.227305 | 0.865852 | 0.69802  | 0.797921 | 1 |
| BIOCARTA_  | 37  | 0.242196 | 0.864834 | 0.662771 | 0.799549 | 1 |
| KEGG_GAP   | 89  | 0.199935 | 0.863347 | 0.738999 | 0.802185 | 1 |
| LOPEZ_MB   | 16  | 0.293659 | 0.862786 | 0.651203 | 0.802834 | 1 |
| ROSS_AML   | 75  | 0.208831 | 0.86214  | 0.739771 | 0.80366  | 1 |
| ST_WNT_C   | 19  | 0.278911 | 0.861627 | 0.660929 | 0.804237 | 1 |
| NELSON_RI  | 16  | 0.296267 | 0.860921 | 0.65913  | 0.805208 | 1 |
| BIOCARTA_  | 24  | 0.262325 | 0.859777 | 0.665517 | 0.807036 | 1 |
| BIOCARTA_  | 22  | 0.268911 | 0.85937  | 0.6875   | 0.807365 | 1 |
| WANG_BAI   | 25  | 0.263271 | 0.858613 | 0.669611 | 0.808351 | 1 |

|            |     |          |          |          |          |   |
|------------|-----|----------|----------|----------|----------|---|
| NIKOLSKY_  | 30  | 0.251141 | 0.857097 | 0.678511 | 0.8109   | 1 |
| YEGNASUB   | 121 | 0.189756 | 0.856653 | 0.766214 | 0.811326 | 1 |
| KEGG_AMY   | 53  | 0.222077 | 0.856189 | 0.710863 | 0.811803 | 1 |
| LEE_DIFFEF | 126 | 0.188489 | 0.855509 | 0.783133 | 0.812732 | 1 |
| REACTOME   | 26  | 0.260863 | 0.854825 | 0.653846 | 0.813611 | 1 |
| HU_ANGIO   | 15  | 0.301787 | 0.852592 | 0.681739 | 0.817619 | 1 |
| REACTOME   | 36  | 0.236785 | 0.852132 | 0.708126 | 0.818062 | 1 |
| BREDEMEY   | 35  | 0.239167 | 0.851209 | 0.714527 | 0.81939  | 1 |
| ABE_INNEF  | 23  | 0.266733 | 0.850122 | 0.678992 | 0.821119 | 1 |
| MARSON_F   | 53  | 0.216108 | 0.849546 | 0.724026 | 0.821767 | 1 |
| ALONSO_M   | 152 | 0.17889  | 0.848002 | 0.826607 | 0.82428  | 1 |
| REACTOME   | 130 | 0.18605  | 0.847858 | 0.802413 | 0.824075 | 1 |
| CHIANG_LI  | 27  | 0.256433 | 0.847503 | 0.709059 | 0.824325 | 1 |
| KEGG_PRIC  | 34  | 0.241127 | 0.846673 | 0.703704 | 0.825428 | 1 |
| NIKOLSKY_  | 143 | 0.182814 | 0.846443 | 0.806597 | 0.825412 | 1 |
| CHEOK_RE   | 23  | 0.26264  | 0.846036 | 0.689165 | 0.825688 | 1 |
| DACOSTA_   | 54  | 0.216674 | 0.844897 | 0.757732 | 0.827379 | 1 |
| BOYALT_I   | 38  | 0.236632 | 0.842092 | 0.705061 | 0.832243 | 1 |
| LIU_NASOF  | 59  | 0.20877  | 0.841388 | 0.764331 | 0.833071 | 1 |
| REACTOME   | 28  | 0.254812 | 0.84066  | 0.706306 | 0.833969 | 1 |
| KEGG_MAT   | 24  | 0.261616 | 0.839683 | 0.724382 | 0.835295 | 1 |
| DORSAM_F   | 30  | 0.242348 | 0.839255 | 0.729494 | 0.835574 | 1 |
| STANELLE_  | 17  | 0.276103 | 0.838711 | 0.671304 | 0.83612  | 1 |
| HESS_TARC  | 56  | 0.211694 | 0.838437 | 0.721582 | 0.836155 | 1 |
| CHUNG_BL   | 126 | 0.185814 | 0.83812  | 0.808801 | 0.836242 | 1 |
| BROWNE_I   | 107 | 0.189845 | 0.836565 | 0.807692 | 0.838662 | 1 |
| BIOCARTA_  | 29  | 0.244402 | 0.835941 | 0.712069 | 0.839334 | 1 |
| ROSS_AML   | 68  | 0.205565 | 0.833198 | 0.783654 | 0.844069 | 1 |
| NIKOLSKY_  | 36  | 0.229655 | 0.832137 | 0.725424 | 0.845502 | 1 |
| MOLENAAF   | 60  | 0.210671 | 0.831751 | 0.755521 | 0.845724 | 1 |
| IWANAGA_   | 149 | 0.181094 | 0.831408 | 0.82853  | 0.845866 | 1 |
| WANG_REC   | 15  | 0.29577  | 0.831367 | 0.694581 | 0.845458 | 1 |
| REACTOME   | 22  | 0.260415 | 0.831345 | 0.711185 | 0.845006 | 1 |
| REACTOME   | 24  | 0.252206 | 0.830534 | 0.723906 | 0.846033 | 1 |

|            |     |          |          |          |          |   |
|------------|-----|----------|----------|----------|----------|---|
| GRADE_CO   | 40  | 0.226932 | 0.829392 | 0.763934 | 0.847672 | 1 |
| REACTOME   | 85  | 0.192718 | 0.827974 | 0.809816 | 0.849696 | 1 |
| ZHAN_MUI   | 45  | 0.218865 | 0.825621 | 0.764007 | 0.85341  | 1 |
| GAUSSMAN   | 18  | 0.279162 | 0.824325 | 0.708475 | 0.85519  | 1 |
| REACTOME   | 132 | 0.180126 | 0.823643 | 0.845833 | 0.855891 | 1 |
| CREIGHTON  | 34  | 0.233301 | 0.82156  | 0.729915 | 0.859059 | 1 |
| DUNNE_TA   | 19  | 0.268438 | 0.82127  | 0.724739 | 0.859075 | 1 |
| KEGG_GLYC  | 26  | 0.251498 | 0.820348 | 0.753873 | 0.860137 | 1 |
| REACTOME   | 20  | 0.26179  | 0.820252 | 0.732323 | 0.859814 | 1 |
| MOREIRA_   | 18  | 0.271999 | 0.818112 | 0.698606 | 0.863005 | 1 |
| BIOCARTA_  | 23  | 0.257829 | 0.817576 | 0.730375 | 0.863425 | 1 |
| SCHLOSSER  | 127 | 0.181725 | 0.816114 | 0.851064 | 0.86539  | 1 |
| DACOSTA_   | 16  | 0.283965 | 0.815787 | 0.705882 | 0.865401 | 1 |
| KLEIN_PRIN | 50  | 0.213023 | 0.81464  | 0.769475 | 0.866938 | 1 |
| BROWNE_I   | 142 | 0.175095 | 0.812478 | 0.857355 | 0.870051 | 1 |
| REACTOME   | 16  | 0.278803 | 0.809665 | 0.723776 | 0.87418  | 1 |
| CROONQUI   | 31  | 0.232589 | 0.809425 | 0.760908 | 0.874069 | 1 |
| CHESLER_B  | 29  | 0.236538 | 0.809037 | 0.754934 | 0.874208 | 1 |
| BOYALT_I   | 50  | 0.207596 | 0.808172 | 0.791667 | 0.875133 | 1 |
| XU_GH1_E   | 99  | 0.185036 | 0.807498 | 0.831269 | 0.875715 | 1 |
| XU_HGF_T   | 75  | 0.195619 | 0.80694  | 0.83033  | 0.87616  | 1 |
| REACTOME   | 28  | 0.239551 | 0.806001 | 0.760399 | 0.87716  | 1 |
| KONDO_PF   | 94  | 0.186917 | 0.804228 | 0.834862 | 0.879586 | 1 |
| REACTOME   | 31  | 0.230987 | 0.803337 | 0.767055 | 0.880524 | 1 |
| KONDO_CC   | 26  | 0.242403 | 0.803195 | 0.766169 | 0.880252 | 1 |
| BIOCARTA_  | 38  | 0.219239 | 0.801291 | 0.781553 | 0.882815 | 1 |
| REACTOME   | 31  | 0.235489 | 0.801206 | 0.772174 | 0.882471 | 1 |
| DAIRKEE_T  | 89  | 0.18796  | 0.800308 | 0.862745 | 0.883378 | 1 |
| CUI_GLUCC  | 47  | 0.20828  | 0.798478 | 0.776451 | 0.885761 | 1 |
| WIKMAN_I   | 17  | 0.269099 | 0.797647 | 0.750883 | 0.886551 | 1 |
| RUGO_RES   | 44  | 0.211112 | 0.797274 | 0.788525 | 0.886635 | 1 |
| SIG_REGUL  | 34  | 0.227843 | 0.79724  | 0.791736 | 0.88619  | 1 |
| BIOCARTA_  | 15  | 0.279694 | 0.797111 | 0.736185 | 0.885868 | 1 |
| REACTOME   | 61  | 0.197334 | 0.796979 | 0.836703 | 0.885567 | 1 |

|            |     |          |          |          |          |   |
|------------|-----|----------|----------|----------|----------|---|
| REACTOME   | 17  | 0.265314 | 0.795436 | 0.755672 | 0.88742  | 1 |
| SESTO_RES  | 67  | 0.194748 | 0.793517 | 0.849057 | 0.88984  | 1 |
| BIOCARTA_  | 18  | 0.261783 | 0.791311 | 0.756993 | 0.892679 | 1 |
| REACTOME   | 82  | 0.1876   | 0.791248 | 0.865204 | 0.892259 | 1 |
| REACTOME   | 21  | 0.254574 | 0.79079  | 0.752066 | 0.892415 | 1 |
| BIOCARTA_  | 17  | 0.266699 | 0.787385 | 0.757366 | 0.896943 | 1 |
| KYNG_DNA   | 44  | 0.211112 | 0.786657 | 0.803987 | 0.897492 | 1 |
| KEGG_N_G   | 45  | 0.206035 | 0.786101 | 0.83871  | 0.897762 | 1 |
| KEGG_GLYC  | 30  | 0.230962 | 0.785333 | 0.801406 | 0.898372 | 1 |
| OUELLET_C  | 33  | 0.225468 | 0.784605 | 0.821124 | 0.898864 | 1 |
| BIOCARTA_  | 15  | 0.280842 | 0.781473 | 0.745975 | 0.902891 | 1 |
| LEE_LIVER_ | 121 | 0.173108 | 0.779437 | 0.886263 | 0.905366 | 1 |
| KEGG_VIBF  | 54  | 0.199083 | 0.778802 | 0.835237 | 0.905756 | 1 |
| JIANG_TIP3 | 21  | 0.245088 | 0.777935 | 0.798987 | 0.90646  | 1 |
| MCCLUNG_   | 51  | 0.198253 | 0.777532 | 0.841845 | 0.906454 | 1 |
| REACTOME   | 60  | 0.190326 | 0.777187 | 0.853354 | 0.906426 | 1 |
| SUZUKI_AN  | 15  | 0.272776 | 0.775176 | 0.788091 | 0.908629 | 1 |
| KORKOLA_   | 23  | 0.242461 | 0.774987 | 0.801695 | 0.908381 | 1 |
| REACTOME   | 23  | 0.24615  | 0.774355 | 0.806612 | 0.908666 | 1 |
| BIOCARTA_  | 16  | 0.262148 | 0.77345  | 0.781513 | 0.909384 | 1 |
| KEGG_STEF  | 44  | 0.20489  | 0.772247 | 0.850848 | 0.910495 | 1 |
| HOFFMANI   | 29  | 0.229669 | 0.770767 | 0.810903 | 0.911913 | 1 |
| REACTOME   | 43  | 0.21111  | 0.770604 | 0.828479 | 0.911627 | 1 |
| YANG_BRE   | 35  | 0.2145   | 0.768799 | 0.839744 | 0.91353  | 1 |
| REACTOME   | 16  | 0.265109 | 0.768567 | 0.797578 | 0.91332  | 1 |
| SARRIO_EP  | 15  | 0.266611 | 0.767019 | 0.79558  | 0.914841 | 1 |
| HOFFMANI   | 21  | 0.246673 | 0.765522 | 0.813726 | 0.916198 | 1 |
| PENG_LEUC  | 22  | 0.241784 | 0.765403 | 0.804207 | 0.915863 | 1 |
| BIOCARTA_  | 22  | 0.240605 | 0.763533 | 0.815254 | 0.917671 | 1 |
| JAZAERI_BI | 37  | 0.213103 | 0.762508 | 0.824324 | 0.918472 | 1 |
| KEGG_DOR   | 24  | 0.234961 | 0.759289 | 0.808171 | 0.921883 | 1 |
| CAMPS_CC   | 75  | 0.181252 | 0.758412 | 0.904908 | 0.922396 | 1 |
| KEGG_STEF  | 17  | 0.259104 | 0.75804  | 0.79046  | 0.922329 | 1 |
| KEGG_CYST  | 33  | 0.212625 | 0.757222 | 0.824561 | 0.922813 | 1 |

|            |     |          |          |          |          |   |
|------------|-----|----------|----------|----------|----------|---|
| CHESLER_B  | 32  | 0.220137 | 0.755694 | 0.8438   | 0.9241   | 1 |
| WATANABI   | 18  | 0.254701 | 0.755528 | 0.822719 | 0.923776 | 1 |
| NICK_RESP  | 27  | 0.222035 | 0.754972 | 0.84669  | 0.923913 | 1 |
| LIU_TARGE  | 16  | 0.260193 | 0.753876 | 0.832727 | 0.924669 | 1 |
| REACTOME   | 18  | 0.2478   | 0.753627 | 0.812606 | 0.924482 | 1 |
| SU_LIVER   | 55  | 0.193537 | 0.752703 | 0.909236 | 0.925032 | 1 |
| REACTOME   | 17  | 0.261222 | 0.752454 | 0.808712 | 0.924795 | 1 |
| YAUCH_HE   | 211 | 0.15467  | 0.751682 | 0.975504 | 0.925134 | 1 |
| BIOCARTA_  | 31  | 0.215081 | 0.74988  | 0.846535 | 0.926678 | 1 |
| LIU_LIVER_ | 24  | 0.23031  | 0.746376 | 0.827471 | 0.930153 | 1 |
| HOEGERKO   | 22  | 0.233676 | 0.745498 | 0.849916 | 0.930604 | 1 |
| ZHOU_INFL  | 259 | 0.148751 | 0.744441 | 0.98762  | 0.931206 | 1 |
| XU_HGF_SI  | 17  | 0.254959 | 0.743371 | 0.802721 | 0.931836 | 1 |
| DASU_IL6_  | 28  | 0.221042 | 0.738106 | 0.851792 | 0.936878 | 1 |
| MAYBURD_   | 27  | 0.225522 | 0.736678 | 0.842756 | 0.937824 | 1 |
| REACTOME   | 28  | 0.221625 | 0.732727 | 0.858824 | 0.94124  | 1 |
| GALE_APL_  | 54  | 0.190097 | 0.731928 | 0.9125   | 0.941487 | 1 |
| FIRESTEIN_ | 28  | 0.21669  | 0.731477 | 0.854484 | 0.941387 | 1 |
| REACTOME   | 16  | 0.245421 | 0.724575 | 0.833043 | 0.947441 | 1 |
| REACTOME   | 37  | 0.200308 | 0.724335 | 0.879661 | 0.947148 | 1 |
| NIELSEN_G  | 20  | 0.233592 | 0.724324 | 0.860034 | 0.946639 | 1 |
| BIOCARTA_  | 17  | 0.242324 | 0.716845 | 0.862712 | 0.953062 | 1 |
| DAVICIONI_ | 20  | 0.228166 | 0.715522 | 0.878049 | 0.953739 | 1 |
| REACTOME   | 17  | 0.241739 | 0.715482 | 0.859862 | 0.953256 | 1 |
| REACTOME   | 16  | 0.24521  | 0.714007 | 0.852893 | 0.954    | 1 |
| BOQUEST_   | 31  | 0.205822 | 0.710623 | 0.898164 | 0.956337 | 1 |
| KEGG_NOT   | 47  | 0.187637 | 0.709802 | 0.92163  | 0.956497 | 1 |
| REACTOME   | 21  | 0.226116 | 0.708403 | 0.884342 | 0.957154 | 1 |
| RICKMAN_   | 53  | 0.183733 | 0.707885 | 0.919872 | 0.957043 | 1 |
| BIOCARTA_  | 34  | 0.198861 | 0.705748 | 0.913323 | 0.958259 | 1 |
| WINNEPEN   | 43  | 0.188866 | 0.705201 | 0.918605 | 0.958196 | 1 |
| KUNINGER_  | 19  | 0.235056 | 0.705168 | 0.855462 | 0.957705 | 1 |
| REACTOME   | 22  | 0.220288 | 0.70454  | 0.894249 | 0.957679 | 1 |
| BARRIER_C  | 18  | 0.236341 | 0.70295  | 0.867347 | 0.958459 | 1 |

|            |     |          |          |          |          |   |
|------------|-----|----------|----------|----------|----------|---|
| BHATTACH   | 75  | 0.169326 | 0.701419 | 0.96672  | 0.959143 | 1 |
| HOSHIDA_I  | 115 | 0.156016 | 0.696936 | 0.982759 | 0.961987 | 1 |
| REACTOME   | 19  | 0.227636 | 0.691216 | 0.872449 | 0.965654 | 1 |
| KUNINGER   | 41  | 0.188434 | 0.690877 | 0.909385 | 0.965366 | 1 |
| WU_ALZHE   | 15  | 0.241827 | 0.689878 | 0.875    | 0.965583 | 1 |
| CONRAD_S   | 37  | 0.190592 | 0.682213 | 0.942149 | 0.970244 | 1 |
| RODRIGUE'  | 15  | 0.239636 | 0.680597 | 0.899099 | 0.97083  | 1 |
| ROVERSI_G  | 49  | 0.176372 | 0.6794   | 0.944715 | 0.971099 | 1 |
| POMEROY_   | 35  | 0.191821 | 0.677164 | 0.923858 | 0.972002 | 1 |
| BIOCARTA_  | 36  | 0.188984 | 0.675445 | 0.93823  | 0.972523 | 1 |
| BOYLAN_M   | 29  | 0.197289 | 0.675014 | 0.907618 | 0.972271 | 1 |
| KEGG_BIOS  | 22  | 0.215932 | 0.672129 | 0.902174 | 0.973466 | 1 |
| WEBER_MI   | 15  | 0.234155 | 0.671796 | 0.896739 | 0.973129 | 1 |
| MATTIOLI_  | 16  | 0.228533 | 0.667049 | 0.897033 | 0.975283 | 1 |
| REACTOME   | 84  | 0.157009 | 0.666652 | 0.979688 | 0.97497  | 1 |
| REACTOME   | 170 | 0.141181 | 0.666432 | 0.997126 | 0.97456  | 1 |
| COLLIS_PRI | 17  | 0.225651 | 0.665067 | 0.914634 | 0.974816 | 1 |
| NIKOLSKY_  | 16  | 0.224437 | 0.664963 | 0.905429 | 0.974351 | 1 |
| HEDENFALI  | 16  | 0.228069 | 0.662833 | 0.921005 | 0.975006 | 1 |
| EHLERS_AN  | 35  | 0.190299 | 0.662735 | 0.948187 | 0.974536 | 1 |
| KANG_FLU   | 22  | 0.209011 | 0.66188  | 0.925087 | 0.974476 | 1 |
| NIKOLSKY_  | 44  | 0.177409 | 0.657484 | 0.955665 | 0.976275 | 1 |
| BIOCARTA_  | 23  | 0.204613 | 0.646756 | 0.939444 | 0.980972 | 1 |
| AIYAR_COE  | 27  | 0.192033 | 0.644962 | 0.94087  | 0.981256 | 1 |
| BIOCARTA_  | 32  | 0.186545 | 0.644578 | 0.95922  | 0.980904 | 1 |
| CUI_TCF21  | 36  | 0.181009 | 0.643858 | 0.956007 | 0.980695 | 1 |
| ST_INTERLI | 26  | 0.194438 | 0.641547 | 0.942708 | 0.981154 | 1 |
| REACTOME   | 15  | 0.224105 | 0.641211 | 0.913124 | 0.980789 | 1 |
| SCHLOSSER  | 46  | 0.169445 | 0.640537 | 0.974068 | 0.980529 | 1 |
| NIKOLSKY_  | 55  | 0.163666 | 0.638371 | 0.980614 | 0.980935 | 1 |
| BIOCARTA_  | 18  | 0.211876 | 0.635791 | 0.918773 | 0.981494 | 1 |
| AUNG_GAS   | 37  | 0.179137 | 0.635471 | 0.97265  | 0.981091 | 1 |
| SCHLOSSER  | 28  | 0.188868 | 0.633404 | 0.958188 | 0.981426 | 1 |
| SIG_BCR_S  | 46  | 0.168959 | 0.632989 | 0.971524 | 0.981058 | 1 |

|            |    |          |          |          |          |   |
|------------|----|----------|----------|----------|----------|---|
| DAVICIONI_ | 15 | 0.219914 | 0.632252 | 0.929947 | 0.980854 | 1 |
| SIG_CHEM   | 43 | 0.169353 | 0.627362 | 0.964646 | 0.982246 | 1 |
| REACTOME   | 20 | 0.203772 | 0.623982 | 0.93437  | 0.982906 | 1 |
| KEGG_NITF  | 21 | 0.198808 | 0.622256 | 0.945614 | 0.98297  | 1 |
| POMEROY_   | 47 | 0.162847 | 0.622142 | 0.976431 | 0.98248  | 1 |
| REACTOME   | 29 | 0.181844 | 0.615869 | 0.966159 | 0.984031 | 1 |
| POMEROY_   | 47 | 0.162847 | 0.615226 | 0.978723 | 0.983724 | 1 |
| WONG_EN    | 41 | 0.162067 | 0.600378 | 0.981908 | 0.987659 | 1 |
| REACTOME   | 53 | 0.151686 | 0.59971  | 0.991987 | 0.98732  | 1 |
| REACTOME   | 24 | 0.184518 | 0.598915 | 0.959184 | 0.987026 | 1 |
| HAHTOLA_   | 15 | 0.209308 | 0.597234 | 0.936953 | 0.986933 | 1 |
| BIOCARTA_  | 28 | 0.176352 | 0.58893  | 0.97084  | 0.988505 | 1 |
| BOHN_PRII  | 36 | 0.162049 | 0.572205 | 0.990083 | 0.991595 | 1 |
| REACTOME   | 20 | 0.18218  | 0.558414 | 0.970395 | 0.993474 | 1 |
| KEGG_PRIM  | 16 | 0.187479 | 0.543114 | 0.97582  | 0.99514  | 1 |
| BERTUCCI_  | 23 | 0.16034  | 0.523614 | 0.99308  | 0.996772 | 1 |
| YOKOE_CA   | 18 | 0.163494 | 0.485425 | 0.994728 | 0.998887 | 1 |
| REACTOME   | 21 | 0.144722 | 0.451797 | 0.994941 | 0.999572 | 1 |
| REACTOME   | 41 | 0.119423 | 0.440497 | 1        | 0.999303 | 1 |
